# Supplementary material for: Integrative proteo-genomic profiling uncovers key biomarkers of lapatinib resistance in HER2-positive breast cancer
Source: Br J Cancer. 2025 Sep 13;133(10):1471–82. doi: 10.1038/s41416-025-03174-3 (PMC12603111; doi:10.1038/s41416-025-03174-3)
Supplement: Supplementary file 4 — Supplementary Tables [file 41416_2025_3174_MOESM4_ESM.xlsx]

## Sheet: UP - OPEN
This tab contains data where the RNA expression and ATAC-seq peak values are positive e.g., gene expression = accessible chromatin
geneId	gene_name	RNAseq_log2FC	RNAseq_padj	chr	peak_start	peak_end	ATACseq_log2FC	ATAC_padj	peak_annotation	Sig & Fold for RNA & ATAC	Combined Ranking		Row Labels	Max. of Combined Ranking
ENSG00000006747	SCIN	5.94628	0	chr7	12588144	12589820	7.52	7.38e-125	Promoter (<=1kb)	TRUE	13.4663		SCIN	13.4663
ENSG00000006747	SCIN	5.94628	0	chr7	12594347	12596758	4.27	5.5e-54	Promoter (<=1kb)	TRUE	10.2163		CPNE8	9.61461
ENSG00000139117	CPNE8	5.15461	5.28778e-27	chr12	38904763	38905891	4.46	1.35e-45	Promoter (<=1kb)	TRUE	9.61461		SLC16A1	9.30891
ENSG00000155380	SLC16A1	6.07891	2.3362e-30	chr1	112955592	112956861	3.23	1.33e-33	Promoter (<=1kb)	TRUE	9.30891		TAC3	8.25417
ENSG00000006747	SCIN	5.94628	0	chr7	12569902	12571333	2.61	4.45e-27	Promoter (<=1kb)	TRUE	8.55628		MAGEB2	8.07124
ENSG00000166863	TAC3	5.86417	1.96881e-48	chr12	57018289	57019167	2.39	2.74e-18	Promoter (1-2kb)	TRUE	8.25417		TRIP13	8.03124
ENSG00000099399	MAGEB2	5.26124	1.78333e-15	chrX	30215372	30215789	2.81	1.42e-12	Promoter (<=1kb)	TRUE	8.07124		IGF2BP3	8.023
ENSG00000071539	TRIP13	1.78124	6.03994e-11	chr5	912250	912938	6.25	1.81e-49	Promoter (1-2kb)	TRUE	8.03124		ANKRD18B	7.86831
ENSG00000136231	IGF2BP3	3.843	8.90156e-27	chr7	23470366	23471391	4.18	1.43e-65	Promoter (<=1kb)	TRUE	8.023		AL009178.2	7.22592
ENSG00000139117	CPNE8	5.15461	5.28778e-27	chr12	38906033	38907020	2.77	4.2e-25	Promoter (<=1kb)	TRUE	7.92461		MBNL3	7.04713
ENSG00000230453	ANKRD18B	6.18831	3.41912e-20	chr9	33523571	33524258	1.68	0.000335	Promoter (<=1kb)	TRUE	7.86831		LINC01515	6.78088
ENSG00000230453	ANKRD18B	6.18831	3.41912e-20	chr9	33548913	33549487	1.19	0.00259	Promoter (<=1kb)	TRUE	7.37831		BMP3	6.63855
ENSG00000136231	IGF2BP3	3.843	8.90156e-27	chr7	23465211	23465929	3.41	1.31e-31	Promoter (1-2kb)	TRUE	7.253		STON1	6.5427
ENSG00000269155	AL009178.2	6.28592	3.82953e-11	chr6	167793514	167793750	0.94	0.0124	Promoter (1-2kb)	TRUE	7.22592		AL512599.1	6.31377
ENSG00000076770	MBNL3	3.68713	3.14073e-13	chrX	132488937	132490016	3.36	2.66e-32	Promoter (<=1kb)	TRUE	7.04713		KRT78	6.30505
ENSG00000228065	LINC01515	3.60088	1.18504e-09	chr10	65570159	65570787	3.18	6.87e-14	Promoter (<=1kb)	TRUE	6.78088		TPM1	6.15753
ENSG00000152785	BMP3	4.41855	1.69896e-28	chr4	81030567	81031058	2.22	1.47e-06	Promoter (<=1kb)	TRUE	6.63855		BASP1	5.74769
ENSG00000243244	STON1	4.0127	8.4963e-20	chr2	48530739	48531722	2.53	5.02e-07	Promoter (<=1kb)	TRUE	6.5427		MT1G	5.54334
ENSG00000226745	AL512599.1	4.21377	1.47028e-18	chr1	40132986	40133493	2.1	0.000112	Promoter (<=1kb)	TRUE	6.31377		HERC6	5.42996
ENSG00000170423	KRT78	4.37505	3.5823e-14	chr12	52848882	52849318	1.93	1.63e-11	Promoter (<=1kb)	TRUE	6.30505		LCP1	5.36843
ENSG00000140416	TPM1	1.88753	6.6726e-29	chr15	63042440	63042932	4.27	1.44e-27	Promoter (<=1kb)	TRUE	6.15753		ZNF829	5.33981
ENSG00000176788	BASP1	4.82769	2.94377e-24	chr5	17216187	17216607	0.92	0.0159	Promoter (<=1kb)	TRUE	5.74769		FIGN	5.31529
ENSG00000243244	STON1	4.0127	8.4963e-20	chr2	48584465	48584947	1.71	2.38e-06	Promoter (2-3kb)	TRUE	5.7227		TBPL1	5.2015
ENSG00000125144	MT1G	3.35334	8.40594e-05	chr16	56667782	56668310	2.19	8.08e-08	Promoter (<=1kb)	TRUE	5.54334		FGFR3	5.164
ENSG00000170423	KRT78	4.37505	3.5823e-14	chr12	52847428	52848018	1.16	2.16e-05	Promoter (<=1kb)	TRUE	5.53505		HPGD	5.16315
ENSG00000138642	HERC6	2.28996	5.09677e-07	chr4	88442690	88443064	3.14	5.61e-13	Promoter (2-3kb)	TRUE	5.42996		CALD1	4.95493
ENSG00000136167	LCP1	2.59843	1.06641e-21	chr13	46181920	46182705	2.77	1.85e-14	Promoter (<=1kb)	TRUE	5.36843		ID4	4.87623
ENSG00000185869	ZNF829	2.24981	3.82805e-08	chr19	36915852	36916658	3.09	1.81e-25	Promoter (<=1kb)	TRUE	5.33981		JAG1	4.87438
ENSG00000182263	FIGN	4.19529	4.6499e-39	chr2	163735915	163736743	1.12	0.00011	Promoter (<=1kb)	TRUE	5.31529		ADGRL2	4.82663
ENSG00000028839	TBPL1	1.3315	2.76302e-06	chr6	133985379	133986174	3.87	5.82e-23	Promoter (1-2kb)	TRUE	5.2015		MCF2L	4.82517
ENSG00000068078	FGFR3	3.474	1.54307e-18	chr4	1805849	1806347	1.69	6.75e-06	Promoter (1-2kb)	TRUE	5.164		ERVW-1	4.77309
ENSG00000164120	HPGD	2.96315	2.41697e-14	chr4	174522069	174523240	2.2	6.23e-12	Promoter (<=1kb)	TRUE	5.16315		MORN3	4.74977
ENSG00000122786	CALD1	2.26493	1.46198e-62	chr7	134919070	134920265	2.69	5.07e-15	Promoter (<=1kb)	TRUE	4.95493		CDH5	4.73797
ENSG00000172201	ID4	3.06623	5.72348e-14	chr6	19837108	19838044	1.81	5.15e-08	Promoter (<=1kb)	TRUE	4.87623		AFF3	4.68008
ENSG00000101384	JAG1	2.26438	8.87287e-12	chr20	10654583	10654900	2.61	2.21e-06	Promoter (1-2kb)	TRUE	4.87438		RCN1	4.65163
ENSG00000136231	IGF2BP3	3.843	8.90156e-27	chr7	23401486	23402269	1.03	0.000648	Promoter (<=1kb)	TRUE	4.873		FRAS1	4.64008
ENSG00000117114	ADGRL2	2.46663	1.5739e-06	chr1	81699278	81699859	2.36	3.07e-13	Promoter (<=1kb)	TRUE	4.82663		STAMBPL1	4.63084
ENSG00000126217	MCF2L	2.16517	4.46049e-32	chr13	113003814	113004254	2.66	2.6e-06	Promoter (1-2kb)	TRUE	4.82517		ACSL4	4.61871
ENSG00000242950	ERVW-1	4.03309	8.10926e-38	chr7	92477990	92478354	0.74	0.0298	Promoter (<=1kb)	TRUE	4.77309		XAF1	4.58989
ENSG00000139714	MORN3	4.00977	2.45583e-63	chr12	121672328	121673504	0.74	0.0295	Promoter (<=1kb)	TRUE	4.74977		B4GALT6	4.4901
ENSG00000179776	CDH5	1.01797	1.02421e-05	chr16	66375600	66376055	3.72	7.72e-25	Promoter (<=1kb)	TRUE	4.73797		LINC01133	4.4675
ENSG00000144218	AFF3	2.84008	1.14566e-05	chr2	99580600	99581065	1.84	2.01e-07	Promoter (2-3kb)	TRUE	4.68008		TRPV3	4.44544
ENSG00000049449	RCN1	2.90163	9.73325e-36	chr11	32091364	32091636	1.75	8.79e-05	Promoter (<=1kb)	TRUE	4.65163		MIR548XHG	4.44193
ENSG00000138759	FRAS1	3.84008	2.32255e-09	chr4	78058603	78059845	0.8	0.0448	Promoter (<=1kb)	TRUE	4.64008		AARD	4.43545
ENSG00000136231	IGF2BP3	3.843	8.90156e-27	chr7	23347420	23348154	0.79	0.0146	Promoter (<=1kb)	TRUE	4.633		DHX58	4.40026
ENSG00000138134	STAMBPL1	2.65084	6.62081e-05	chr10	88880115	88881039	1.98	2.96e-10	Promoter (<=1kb)	TRUE	4.63084		SOX6	4.39781
ENSG00000068366	ACSL4	2.92871	2.41591e-08	chrX	109733140	109733664	1.69	4.86e-07	Promoter (<=1kb)	TRUE	4.61871		NPNT	4.3609
ENSG00000132530	XAF1	3.26989	3.87073e-11	chr17	6755799	6756293	1.32	0.00722	Promoter (<=1kb)	TRUE	4.58989		AL513165.1	4.33527
ENSG00000118276	B4GALT6	1.8801	4.94729e-05	chr18	31658844	31659674	2.61	3.46e-10	Promoter (<=1kb)	TRUE	4.4901		TGFBR3	4.28686
ENSG00000224259	LINC01133	3.0675	1.35074e-21	chr1	159960713	159961258	1.4	2.46e-07	Promoter (<=1kb)	TRUE	4.4675		MCAM	4.15827
ENSG00000167723	TRPV3	1.38544	0.00201817	chr17	3528982	3529201	3.06	1.91e-10	Promoter (<=1kb)	TRUE	4.44544		TRIM29	4.15087
ENSG00000224141	MIR548XHG	1.83193	4.52345e-05	chr21	18759765	18760534	2.61	2.4e-15	Promoter (<=1kb)	TRUE	4.44193		MELK	4.11618
ENSG00000205002	AARD	3.23545	5.78134e-40	chr8	116937795	116938849	1.2	1.97e-05	Promoter (<=1kb)	TRUE	4.43545		WIPF1	4.10697
ENSG00000108771	DHX58	2.71026	1.4495e-34	chr17	42111964	42113021	1.69	1.41e-13	Promoter (<=1kb)	TRUE	4.40026		PPP1R14C	4.09548
ENSG00000110693	SOX6	2.28781	9.59447e-10	chr11	16604948	16605323	2.11	8.06e-07	Promoter (<=1kb)	TRUE	4.39781		CREB5	4.09543
ENSG00000168743	NPNT	1.8509	1.55715e-05	chr4	105909805	105910372	2.51	1.08e-09	Promoter (1-2kb)	TRUE	4.3609		ITGAM	4.00926
ENSG00000234160	AL513165.1	2.89527	8.39595e-12	chr9	37511087	37511430	1.44	2.35e-07	Promoter (1-2kb)	TRUE	4.33527		TNFSF15	3.97734
ENSG00000069702	TGFBR3	2.28686	5.80303e-10	chr1	91906205	91906580	2	0.000144	Promoter (<=1kb)	TRUE	4.28686		ALCAM	3.96197
ENSG00000068078	FGFR3	3.474	1.54307e-18	chr4	1793188	1793641	0.76	0.0335	Promoter (<=1kb)	TRUE	4.234		NEDD4L	3.95911
ENSG00000076706	MCAM	3.46827	4.03453e-66	chr11	119310655	119311323	0.69	0.0203	Promoter (<=1kb)	TRUE	4.15827		EML1	3.87582
ENSG00000137699	TRIM29	2.38087	9.3762e-27	chr11	120121201	120122399	1.77	3.39e-09	Promoter (<=1kb)	TRUE	4.15087		CPED1	3.82432
ENSG00000165304	MELK	2.71618	2.45864e-60	chr9	36572525	36573562	1.4	1.07e-07	Promoter (<=1kb)	TRUE	4.11618		XAGE2	3.81793
ENSG00000115935	WIPF1	3.05697	2.03312e-63	chr2	174584875	174587104	1.05	0.000495	Promoter (<=1kb)	TRUE	4.10697		GNE	3.80897
ENSG00000198729	PPP1R14C	1.05548	1.88076e-08	chr6	150140861	150141426	3.04	9.72e-18	Promoter (1-2kb)	TRUE	4.09548		NRP1	3.72455
ENSG00000146592	CREB5	2.89543	1.09991e-24	chr7	28611532	28612348	1.2	0.0321	Promoter (2-3kb)	TRUE	4.09543		CSF2RB	3.69328
ENSG00000049449	RCN1	2.90163	9.73325e-36	chr11	32087753	32088587	1.17	0.000779	Promoter (2-3kb)	TRUE	4.07163		LIMS2	3.64044
ENSG00000169896	ITGAM	2.25926	6.09185e-05	chr16	31269354	31269879	1.75	1.39e-09	Promoter (2-3kb)	TRUE	4.00926		GRB14	3.63805
ENSG00000181634	TNFSF15	2.53734	6.68524e-11	chr9	114805727	114806673	1.44	2.81e-09	Promoter (<=1kb)	TRUE	3.97734		TLR3	3.63564
ENSG00000137699	TRIM29	2.38087	9.3762e-27	chr11	120142072	120142392	1.59	1.16e-07	Promoter (2-3kb)	TRUE	3.97087		OAS3	3.62546
ENSG00000170017	ALCAM	1.98197	0.00157199	chr3	105366211	105366999	1.98	1.75e-14	Promoter (<=1kb)	TRUE	3.96197		ANXA1	3.60161
ENSG00000049759	NEDD4L	1.71911	9.9136e-15	chr18	58254585	58255289	2.24	5.39e-13	Promoter (<=1kb)	TRUE	3.95911		CAV1	3.59256
ENSG00000118276	B4GALT6	1.8801	4.94729e-05	chr18	31657954	31658797	2.03	1.65e-06	Promoter (<=1kb)	TRUE	3.9101		HPN	3.58628
ENSG00000066629	EML1	2.73582	3.74454e-17	chr14	99793136	99793624	1.14	0.00022	Promoter (<=1kb)	TRUE	3.87582		BMP7	3.53782
ENSG00000106034	CPED1	2.45432	5.87895e-07	chr7	121060225	121060800	1.37	1.56e-07	Promoter (1-2kb)	TRUE	3.82432		RNF38	3.51497
ENSG00000155622	XAGE2	2.21793	4.32287e-11	chrX	52368408	52369238	1.6	6.77e-08	Promoter (<=1kb)	TRUE	3.81793		MCM2	3.50618
ENSG00000159921	GNE	2.22897	7.10011e-21	chr9	36273292	36274234	1.58	1.9e-07	Promoter (2-3kb)	TRUE	3.80897		CPA4	3.49
ENSG00000099250	NRP1	2.15455	4.6e-35	chr10	33264291	33264653	1.57	9.64e-06	Promoter (<=1kb)	TRUE	3.72455		MID1	3.48292
ENSG00000100368	CSF2RB	2.54328	9.13781e-12	chr22	36910360	36910805	1.15	0.000219	Promoter (2-3kb)	TRUE	3.69328		SLC49A3	3.4742
ENSG00000126217	MCF2L	2.16517	4.46049e-32	chr13	112984599	112985232	1.52	2.26e-06	Promoter (<=1kb)	TRUE	3.68517		TOMM5	3.47128
ENSG00000072163	LIMS2	1.91044	0.00501856	chr2	127637663	127638786	1.73	1.74e-08	Promoter (1-2kb)	TRUE	3.64044		TNFAIP3	3.46315
ENSG00000115290	GRB14	2.39805	8.11865e-07	chr2	164620955	164621605	1.24	0.000191	Promoter (<=1kb)	TRUE	3.63805		VGF	3.43416
ENSG00000164342	TLR3	2.26564	0.00230562	chr4	186079101	186079531	1.37	0.000517	Promoter (2-3kb)	TRUE	3.63564		TRAM1L1	3.38705
ENSG00000111331	OAS3	2.84546	8.99517e-29	chr12	112937920	112938695	0.78	0.00312	Promoter (<=1kb)	TRUE	3.62546		CST6	3.37206
ENSG00000135046	ANXA1	2.75161	2.91255e-08	chr9	73151675	73151926	0.85	0.022	Promoter (<=1kb)	TRUE	3.60161		AC078962.1	3.37106
ENSG00000105974	CAV1	2.53256	5.15251e-31	chr7	116524588	116525223	1.06	0.000375	Promoter (<=1kb)	TRUE	3.59256		PRKD3	3.36792
ENSG00000137699	TRIM29	2.38087	9.3762e-27	chr11	120137900	120138702	1.21	0.0443	Promoter (<=1kb)	TRUE	3.59087		AL592114.1	3.36568
ENSG00000105707	HPN	2.04628	0.000671151	chr19	35040851	35041732	1.54	6.26e-08	Promoter (<=1kb)	TRUE	3.58628		TNFRSF14	3.34142
ENSG00000101384	JAG1	2.26438	8.87287e-12	chr20	10659610	10661108	1.29	2.18e-05	Promoter (1-2kb)	TRUE	3.55438		LRRIQ1	3.3232
ENSG00000101144	BMP7	2.90782	1.6233e-06	chr20	57170149	57170752	0.63	0.0132	Promoter (2-3kb)	TRUE	3.53782		DLC1	3.29429
ENSG00000137075	RNF38	1.93497	1.7422e-17	chr9	36487057	36488317	1.58	1.69e-08	Promoter (<=1kb)	TRUE	3.51497		2001-03-01	3.27255
ENSG00000073111	MCM2	2.07618	5.37336e-22	chr3	127606955	127607255	1.43	1.35e-05	Promoter (2-3kb)	TRUE	3.50618		LAMB1	3.24007
ENSG00000128510	CPA4	1.86	1.59817e-07	chr7	130292918	130293774	1.63	6.1e-08	Promoter (<=1kb)	TRUE	3.49		FBLN1	3.24003
ENSG00000101871	MID1	1.86292	2.73848e-35	chrX	10578868	10579758	1.62	1.11e-08	Promoter (1-2kb)	TRUE	3.48292		HIST1H2BE	3.22543
ENSG00000169026	SLC49A3	2.2842	2.09316e-31	chr4	687125	689060	1.19	2e-05	Promoter (<=1kb)	TRUE	3.4742		CNKSR3	3.21456
ENSG00000175768	TOMM5	2.04128	3.18522e-32	chr9	37591993	37592905	1.43	3.32e-07	Promoter (<=1kb)	TRUE	3.47128		BCAP29	3.19368
ENSG00000137699	TRIM29	2.38087	9.3762e-27	chr11	120124989	120125421	1.09	0.000208	Promoter (<=1kb)	TRUE	3.47087		RASSF2	3.19131
ENSG00000100368	CSF2RB	2.54328	9.13781e-12	chr22	36921971	36922726	0.92	0.0136	Promoter (<=1kb)	TRUE	3.46328		PCDH7	3.1753
ENSG00000118503	TNFAIP3	2.29315	2.6168e-16	chr6	137873345	137874593	1.17	4.09e-06	Promoter (1-2kb)	TRUE	3.46315		SGMS2	3.17123
ENSG00000128564	VGF	2.08416	1.94445e-20	chr7	101162204	101163099	1.35	2.66e-05	Promoter (2-3kb)	TRUE	3.43416		HEG1	3.17004
ENSG00000137075	RNF38	1.93497	1.7422e-17	chr9	36400265	36401360	1.48	3.82e-07	Promoter (<=1kb)	TRUE	3.41497		GRHPR	3.14143
ENSG00000174599	TRAM1L1	2.29705	7.78273e-08	chr4	117084988	117085715	1.09	0.000371	Promoter (<=1kb)	TRUE	3.38705		POLR1E	3.13349
ENSG00000175315	CST6	2.77206	1.26215e-06	chr11	66012907	66013389	0.6	0.0403	Promoter (1-2kb)	TRUE	3.37206		ZNF568	3.13208
ENSG00000225195	AC078962.1	2.61106	5.71386e-07	chr12	64625251	64626025	0.76	0.00361	Promoter (2-3kb)	TRUE	3.37106		ZBTB5	3.12992
ENSG00000115825	PRKD3	1.80792	1.2414e-16	chr2	37324664	37325533	1.56	3.18e-06	Promoter (<=1kb)	TRUE	3.36792		GALNT17	3.10097
ENSG00000219133	AL592114.1	2.70568	8.72135e-10	chr1	204349526	204350390	0.66	0.0153	Promoter (2-3kb)	TRUE	3.36568		BACH1	3.08751
ENSG00000136167	LCP1	2.59843	1.06641e-21	chr13	46168328	46169049	0.76	0.0189	Promoter (<=1kb)	TRUE	3.35843		AC026894.1	3.0843
ENSG00000157873	TNFRSF14	1.92142	0.000162569	chr1	2556022	2556852	1.42	1.62e-06	Promoter (<=1kb)	TRUE	3.34142		ZYG11A	3.08069
ENSG00000159921	GNE	2.22897	7.10011e-21	chr9	36247989	36248453	1.11	0.00402	Promoter (<=1kb)	TRUE	3.33897		DDX60	3.06761
ENSG00000028839	TBPL1	1.3315	2.76302e-06	chr6	133978197	133980440	2	2.46e-13	Promoter (2-3kb)	TRUE	3.3315		INAVA	3.06493
ENSG00000133640	LRRIQ1	2.3532	3.51291e-05	chr12	85036049	85036965	0.97	0.000621	Promoter (<=1kb)	TRUE	3.3232		PTPN14	3.06481
ENSG00000110693	SOX6	2.28781	9.59447e-10	chr11	16605628	16606479	1.02	0.000672	Promoter (<=1kb)	TRUE	3.30781		KYNU	3.06037
ENSG00000164741	DLC1	2.36429	9.97893e-06	chr8	13101136	13101781	0.93	0.0435	Promoter (<=1kb)	TRUE	3.29429		ZCCHC7	3.05354
ENSG00000186205	2001-03-01	2.16255	0.00962102	chr1	220786548	220787571	1.11	0.00256	Promoter (<=1kb)	TRUE	3.27255		AC241585.2	3.04273
ENSG00000164342	TLR3	2.26564	0.00230562	chr4	186068075	186069192	0.98	0.00286	Promoter (<=1kb)	TRUE	3.24564		PRMT6	3.02909
ENSG00000091136	LAMB1	2.03007	3.59738e-74	chr7	108003990	108004986	1.21	0.0467	Promoter (<=1kb)	TRUE	3.24007		GLI3	3.01182
ENSG00000077942	FBLN1	1.09003	9.0729e-14	chr22	45521246	45521542	2.15	1.52e-12	Promoter (2-3kb)	TRUE	3.24003		A2ML1	3.00892
ENSG00000181634	TNFSF15	2.53734	6.68524e-11	chr9	114804358	114804822	0.7	0.0134	Promoter (1-2kb)	TRUE	3.23734		FNIP2	3.0015
ENSG00000274290	HIST1H2BE	1.12543	9.4542e-06	chr6	26170039	26170469	2.1	2.26e-10	Promoter (1-2kb)	TRUE	3.22543		BTC	2.97218
ENSG00000153721	CNKSR3	1.00456	0.0050388	chr6	154508648	154508986	2.21	2.56e-11	Promoter (1-2kb)	TRUE	3.21456		RASSF3	2.9623
ENSG00000075790	BCAP29	1.37368	2.30646e-18	chr7	107595364	107595626	1.82	0.000129	Promoter (<=1kb)	TRUE	3.19368		AL139246.5	2.96006
ENSG00000101265	RASSF2	1.01131	0.0282909	chr20	4817217	4817601	2.18	1.26e-07	Promoter (2-3kb)	TRUE	3.19131		KHK	2.92853
ENSG00000169851	PCDH7	1.4753	4.20216e-06	chr4	30719506	30720856	1.7	5.66e-09	Promoter (<=1kb)	TRUE	3.1753		CRIM1	2.88643
ENSG00000164023	SGMS2	1.09123	0.000214306	chr4	107889949	107890580	2.08	1.85e-10	Promoter (2-3kb)	TRUE	3.17123		DEPDC5	2.8304
ENSG00000173706	HEG1	1.32004	6.57884e-09	chr3	124976445	124976849	1.85	5.78e-06	Promoter (2-3kb)	TRUE	3.17004		PRIMPOL	2.82042
ENSG00000075790	BCAP29	1.37368	2.30646e-18	chr7	107584622	107585160	1.79	1.76e-10	Promoter (<=1kb)	TRUE	3.16368		MOB3B	2.81351
ENSG00000137106	GRHPR	1.57143	2.6915e-35	chr9	37422222	37422932	1.57	1.64e-08	Promoter (<=1kb)	TRUE	3.14143		ALDH16A1	2.80428
ENSG00000122786	CALD1	2.26493	1.46198e-62	chr7	134891129	134891940	0.87	0.00457	Promoter (<=1kb)	TRUE	3.13493		OSBP2	2.79148
ENSG00000137054	POLR1E	2.13349	6.39223e-40	chr9	37485453	37486183	1	0.000997	Promoter (<=1kb)	TRUE	3.13349		HOTAIR	2.79115
ENSG00000198453	ZNF568	2.12208	2.42775e-06	chr19	36972977	36973570	1.01	0.00186	Promoter (<=1kb)	TRUE	3.13208		MIR99AHG	2.77548
ENSG00000168795	ZBTB5	1.74992	8.65152e-17	chr9	37464714	37466495	1.38	5.92e-08	Promoter (<=1kb)	TRUE	3.12992		FAM169A	2.76858
ENSG00000185274	GALNT17	1.17097	4.00288e-12	chr7	71303626	71304192	1.93	0.000255	Promoter (2-3kb)	TRUE	3.10097		IQGAP3	2.75809
ENSG00000156273	BACH1	1.84751	1.48916e-16	chr21	29196194	29196812	1.24	3.8e-06	Promoter (2-3kb)	TRUE	3.08751		UCHL1	2.75163
ENSG00000255159	AC026894.1	2.2143	0.00133482	chr11	8787102	8787673	0.87	0.0169	Promoter (1-2kb)	TRUE	3.0843		EIF4ENIF1	2.73836
ENSG00000175768	TOMM5	2.04128	3.18522e-32	chr9	37594430	37594957	1.04	0.000606	Promoter (1-2kb)	TRUE	3.08128		GPNMB	2.72422
ENSG00000203995	ZYG11A	2.35069	5.00177e-10	chr1	52842519	52843395	0.73	0.0159	Promoter (<=1kb)	TRUE	3.08069		AC102953.2	2.7223
ENSG00000137628	DDX60	1.93761	2.66812e-05	chr4	168318351	168318914	1.13	0.000218	Promoter (<=1kb)	TRUE	3.06761		SAGE1	2.71436
ENSG00000163362	INAVA	1.65493	4.22158e-11	chr1	200896360	200897023	1.41	4.97e-06	Promoter (1-2kb)	TRUE	3.06493		CHODL	2.71254
ENSG00000152104	PTPN14	1.57481	2.16693e-39	chr1	214377717	214378653	1.49	1.32e-07	Promoter (1-2kb)	TRUE	3.06481		KIF3C	2.70733
ENSG00000115919	KYNU	1.68037	1.87007e-11	chr2	142914833	142915697	1.38	0.000489	Promoter (2-3kb)	TRUE	3.06037		KLHL5	2.69946
ENSG00000147905	ZCCHC7	1.61354	8.95236e-29	chr9	37120016	37121033	1.44	2.07e-08	Promoter (<=1kb)	TRUE	3.05354		WRAP53	2.66145
ENSG00000272419	AC241585.2	1.92273	5.53903e-07	chr1	145215839	145216191	1.12	0.0071	Promoter (<=1kb)	TRUE	3.04273		SLCO4A1	2.65876
ENSG00000198890	PRMT6	1.88909	5.9268e-09	chr1	107056460	107058491	1.14	3.86e-05	Promoter (<=1kb)	TRUE	3.02909		PGM5	2.64848
ENSG00000122786	CALD1	2.26493	1.46198e-62	chr7	134779314	134779898	0.76	0.00726	Promoter (<=1kb)	TRUE	3.02493		PARP8	2.64568
ENSG00000106571	GLI3	1.64182	2.45214e-11	chr7	42237190	42237849	1.37	8.23e-08	Promoter (<=1kb)	TRUE	3.01182		PLIN2	2.63678
ENSG00000166535	A2ML1	1.54892	4.4007e-13	chr12	8822253	8822614	1.46	4.51e-07	Promoter (<=1kb)	TRUE	3.00892		NEURL3	2.62286
ENSG00000052795	FNIP2	2.1415	1.2241e-09	chr4	158805619	158806071	0.86	0.0127	Promoter (<=1kb)	TRUE	3.0015		HINT2	2.61644
ENSG00000174808	BTC	2.09218	0.000429092	chr4	74796683	74796995	0.88	0.0115	Promoter (1-2kb)	TRUE	2.97218		ANXA2	2.60913
ENSG00000153179	RASSF3	2.1323	1.17169e-14	chr12	64610137	64610744	0.83	0.00462	Promoter (<=1kb)	TRUE	2.9623		FAM83G	2.5645
ENSG00000272449	AL139246.5	2.34006	2.31135e-08	chr1	2547977	2549006	0.62	0.0287	Promoter (1-2kb)	TRUE	2.96006		BFSP1	2.55987
ENSG00000138030	KHK	2.03853	6.41483e-06	chr2	27096193	27096680	0.89	0.00847	Promoter (1-2kb)	TRUE	2.92853		STXBP6	2.5575
ENSG00000150938	CRIM1	1.32643	1.18465e-12	chr2	36355688	36355941	1.56	7.3e-07	Promoter (<=1kb)	TRUE	2.88643		AP003555.2	2.52775
ENSG00000174808	BTC	2.09218	0.000429092	chr4	74793953	74795068	0.78	0.0109	Promoter (<=1kb)	TRUE	2.87218		MAT1A	2.5186
ENSG00000101384	JAG1	2.26438	8.87287e-12	chr20	10673585	10674933	0.59	0.0423	Promoter (<=1kb)	TRUE	2.85438		SLC35E2	2.51274
ENSG00000100150	DEPDC5	1.0304	2.17076e-07	chr22	31870619	31871533	1.8	8.27e-10	Promoter (2-3kb)	TRUE	2.8304		FAM13A	2.50208
ENSG00000164306	PRIMPOL	1.95042	2.98724e-18	chr4	184688371	184689158	0.87	0.00968	Promoter (2-3kb)	TRUE	2.82042		CMC2	2.49264
ENSG00000120162	MOB3B	1.17351	9.47136e-10	chr9	27528201	27529919	1.64	3.25e-09	Promoter (<=1kb)	TRUE	2.81351		POMT2	2.49066
ENSG00000161618	ALDH16A1	1.32428	2.48752e-15	chr19	49468138	49469405	1.48	2.44e-08	Promoter (<=1kb)	TRUE	2.80428		TOPORS	2.48181
ENSG00000184792	OSBP2	1.79148	3.01799e-05	chr22	30881992	30882707	1	0.00699	Promoter (<=1kb)	TRUE	2.79148		IRF7	2.47213
ENSG00000228630	HOTAIR	1.40115	2.5555e-06	chr12	53976598	53976958	1.39	1.1e-05	Promoter (1-2kb)	TRUE	2.79115		CTSV	2.46258
ENSG00000215386	MIR99AHG	1.99548	1.06416e-11	chr21	16419169	16420574	0.78	0.0179	Promoter (<=1kb)	TRUE	2.77548		TRIM47	2.46217
ENSG00000198780	FAM169A	1.08858	0.00133607	chr5	74867034	74868094	1.68	0.0122	Promoter (<=1kb)	TRUE	2.76858		FANCG	2.45945
ENSG00000183856	IQGAP3	1.08809	4.27132e-10	chr1	156571350	156571843	1.67	1.71e-09	Promoter (<=1kb)	TRUE	2.75809		TCHH	2.45611
ENSG00000154277	UCHL1	1.65163	0.00928821	chr4	41258423	41259085	1.1	0.00447	Promoter (1-2kb)	TRUE	2.75163		LDOC1	2.44208
ENSG00000073111	MCM2	2.07618	5.37336e-22	chr3	127598098	127598643	0.67	0.0337	Promoter (<=1kb)	TRUE	2.74618		CPS1	2.43304
ENSG00000184708	EIF4ENIF1	1.60836	3.5473e-22	chr22	31489385	31490739	1.13	0.000124	Promoter (<=1kb)	TRUE	2.73836		PRRG4	2.42919
ENSG00000136235	GPNMB	1.88422	3.46524e-36	chr7	23232827	23233255	0.84	0.0246	Promoter (2-3kb)	TRUE	2.72422		MX1	2.42528
ENSG00000273230	AC102953.2	1.5823	8.0571e-10	chr7	1466784	1467091	1.14	2.37e-05	Promoter (<=1kb)	TRUE	2.7223		NLK	2.40498
ENSG00000215386	MIR99AHG	1.99548	1.06416e-11	chr21	16587029	16588718	0.72	0.0103	Promoter (<=1kb)	TRUE	2.71548		TAPBPL	2.37945
ENSG00000181433	SAGE1	1.75436	1.00867e-09	chrX	135893174	135893753	0.96	0.00363	Promoter (2-3kb)	TRUE	2.71436		FAAH	2.37642
ENSG00000154645	CHODL	1.48254	5.2816e-07	chr21	17900729	17901181	1.23	0.0192	Promoter (<=1kb)	TRUE	2.71254		MIR9-3HG	2.37031
ENSG00000084731	KIF3C	1.35733	0.0172487	chr2	25977430	25978165	1.35	3.7e-07	Promoter (2-3kb)	TRUE	2.70733		FURIN	2.36489
ENSG00000106571	GLI3	1.64182	2.45214e-11	chr7	42234441	42235060	1.06	0.00417	Promoter (1-2kb)	TRUE	2.70182		HOXC4	2.33946
ENSG00000109790	KLHL5	1.58946	0.00779837	chr4	39043944	39045193	1.11	6.78e-05	Promoter (<=1kb)	TRUE	2.69946		LRRCC1	2.33589
ENSG00000184708	EIF4ENIF1	1.60836	3.5473e-22	chr22	31496061	31497067	1.07	2.92e-05	Promoter (<=1kb)	TRUE	2.67836		RRS1	2.3235
ENSG00000141499	WRAP53	1.14145	2.76002e-05	chr17	7703311	7703930	1.52	1.45e-06	Promoter (<=1kb)	TRUE	2.66145		CHMP2B	2.31555
ENSG00000101187	SLCO4A1	1.77876	1.84546e-15	chr20	62641930	62642971	0.88	0.00699	Promoter (<=1kb)	TRUE	2.65876		NDRG4	2.31015
ENSG00000154330	PGM5	1.76848	1.18638e-07	chr9	68493940	68494667	0.88	0.00512	Promoter (2-3kb)	TRUE	2.64848		INPP5D	2.30154
ENSG00000151883	PARP8	1.03568	5.21573e-09	chr5	50665637	50666053	1.61	0.000252	Promoter (<=1kb)	TRUE	2.64568		SYNPO2	2.29257
ENSG00000147872	PLIN2	1.65678	5.3802e-07	chr9	19127397	19127767	0.98	0.004	Promoter (<=1kb)	TRUE	2.63678		TRMT44	2.28221
ENSG00000163121	NEURL3	1.79286	0.000753945	chr2	96505291	96506009	0.83	0.0112	Promoter (<=1kb)	TRUE	2.62286		TGFB2	2.28147
ENSG00000137133	HINT2	1.85644	4.15662e-20	chr9	35814643	35815817	0.76	0.00956	Promoter (<=1kb)	TRUE	2.61644		CLTA	2.25159
ENSG00000182718	ANXA2	1.52913	3.37696e-16	chr15	60397588	60398607	1.08	0.0012	Promoter (<=1kb)	TRUE	2.60913		EIF2AK2	2.24287
ENSG00000101871	MID1	1.86292	2.73848e-35	chrX	10617162	10618608	0.71	0.0135	Promoter (1-2kb)	TRUE	2.57292		UTRN	2.21544
ENSG00000188522	FAM83G	1.1645	1.15141e-06	chr17	19004480	19005138	1.4	1.62e-05	Promoter (<=1kb)	TRUE	2.5645		CAAP1	2.20748
ENSG00000125864	BFSP1	1.51987	0.00179073	chr20	17556981	17558973	1.04	5.86e-05	Promoter (<=1kb)	TRUE	2.55987		KHDC4	2.20661
ENSG00000168952	STXBP6	1.1675	0.0105893	chr14	25049713	25050374	1.39	9.04e-05	Promoter (<=1kb)	TRUE	2.5575		THADA	2.18259
ENSG00000254605	AP003555.2	1.81775	4.47179e-05	chr11	70020252	70021115	0.71	0.024	Promoter (<=1kb)	TRUE	2.52775		RBBP8	2.16525
ENSG00000151224	MAT1A	1.9286	1.87777e-06	chr10	80289279	80290236	0.59	0.0267	Promoter (<=1kb)	TRUE	2.5186		KIAA0319	2.15577
ENSG00000215790	SLC35E2	1.03274	0.0438035	chr1	1741030	1741765	1.48	2.32e-06	Promoter (1-2kb)	TRUE	2.51274		AC026740.1	2.12195
ENSG00000138640	FAM13A	1.60208	7.00606e-10	chr4	88823067	88823846	0.9	0.0031	Promoter (<=1kb)	TRUE	2.50208		POMGNT1	2.11855
ENSG00000103121	CMC2	1.05264	8.30159e-10	chr16	80994604	80994973	1.44	1e-06	Promoter (2-3kb)	TRUE	2.49264		CDKN2A	2.11756
ENSG00000009830	POMT2	1.28066	2.42691e-13	chr14	77306880	77307910	1.21	0.000454	Promoter (<=1kb)	TRUE	2.49066		GNB4	2.10581
ENSG00000197579	TOPORS	1.73181	1.72428e-24	chr9	32550671	32552850	0.75	0.0249	Promoter (<=1kb)	TRUE	2.48181		SAMD4A	2.09122
ENSG00000185507	IRF7	1.64213	1.55232e-13	chr11	615567	616150	0.83	0.00338	Promoter (<=1kb)	TRUE	2.47213		AC007849.1	2.08674
ENSG00000136943	CTSV	1.17258	6.42195e-05	chr9	97042017	97042522	1.29	9.72e-06	Promoter (2-3kb)	TRUE	2.46258		GSAP	2.08561
ENSG00000132481	TRIM47	1.77217	3.14031e-22	chr17	75877182	75878937	0.69	0.0221	Promoter (<=1kb)	TRUE	2.46217		FAM189B	2.0751
ENSG00000138640	FAM13A	1.60208	7.00606e-10	chr4	89056848	89057652	0.86	0.00442	Promoter (<=1kb)	TRUE	2.46208		IGSF5	2.06274
ENSG00000221829	FANCG	1.86945	8.88361e-30	chr9	35079505	35080464	0.59	0.05	Promoter (<=1kb)	FALSE	2.45945		LINC01814	2.05882
ENSG00000159450	TCHH	1.58611	8.6464e-06	chr1	152110416	152111313	0.87	0.0105	Promoter (2-3kb)	TRUE	2.45611		SLC16A4	2.0485
ENSG00000049759	NEDD4L	1.71911	9.9136e-15	chr18	58087847	58089020	0.73	0.0126	Promoter (1-2kb)	TRUE	2.44911		MYORG	2.04785
ENSG00000182195	LDOC1	1.52208	1.26591e-09	chrX	141176713	141177518	0.92	0.00762	Promoter (<=1kb)	TRUE	2.44208		LINC01234	2.03736
ENSG00000021826	CPS1	1.18304	0.0119644	chr2	210558883	210559687	1.25	0.0281	Promoter (2-3kb)	TRUE	2.43304		RUFY3	2.01568
ENSG00000135378	PRRG4	1.76919	4.6218e-30	chr11	32829262	32830612	0.66	0.0284	Promoter (<=1kb)	TRUE	2.42919		TUSC1	2.00037
ENSG00000157601	MX1	1.74528	1.84545e-08	chr21	41420150	41420845	0.68	0.0363	Promoter (<=1kb)	TRUE	2.42528		SPECC1	1.99652
ENSG00000087095	NLK	1.01498	3.33225e-06	chr17	28188622	28188963	1.39	0.000959	Promoter (1-2kb)	TRUE	2.40498		CARD10	1.95287
ENSG00000139192	TAPBPL	1.03945	0.00584312	chr12	6451422	6452434	1.34	1.34e-07	Promoter (<=1kb)	TRUE	2.37945		JRK	1.91835
ENSG00000117480	FAAH	1.41642	9.04533e-15	chr1	46394195	46394710	0.96	0.0015	Promoter (<=1kb)	TRUE	2.37642		TMEM52B	1.89653
ENSG00000255571	MIR9-3HG	1.28031	0.00603788	chr15	89385256	89386087	1.09	0.000315	Promoter (<=1kb)	TRUE	2.37031		MLLT3	1.89139
ENSG00000140564	FURIN	1.56489	1.10365e-12	chr15	90867961	90868853	0.8	0.0244	Promoter (<=1kb)	TRUE	2.36489		ENDOU	1.89138
ENSG00000153721	CNKSR3	1.00456	0.0050388	chr6	154510372	154510838	1.35	0.000454	Promoter (<=1kb)	TRUE	2.35456		EFNA1	1.88035
ENSG00000198353	HOXC4	1.40946	1.57781e-06	chr12	54036954	54037271	0.93	0.00764	Promoter (<=1kb)	TRUE	2.33946		SLC52A3	1.87496
ENSG00000133739	LRRCC1	1.46589	9.34156e-06	chr8	85106698	85107703	0.87	0.00646	Promoter (<=1kb)	TRUE	2.33589		KMO	1.86929
ENSG00000077942	FBLN1	1.09003	9.0729e-14	chr22	45516644	45517393	1.24	9.45e-05	Promoter (<=1kb)	TRUE	2.33003		C4orf19	1.86868
ENSG00000077942	FBLN1	1.09003	9.0729e-14	chr22	45534481	45535694	1.24	0.000681	Promoter (<=1kb)	TRUE	2.33003		SMPD1	1.86194
ENSG00000163362	INAVA	1.65493	4.22158e-11	chr1	200907607	200909086	0.67	0.0152	Promoter (<=1kb)	TRUE	2.32493		NFX1	1.8584
ENSG00000179041	RRS1	1.5035	4.71005e-19	chr8	66428535	66429816	0.82	0.00671	Promoter (<=1kb)	TRUE	2.3235		DCLK2	1.85376
ENSG00000083937	CHMP2B	1.12555	1.38229e-08	chr3	87226690	87227941	1.19	2.01e-05	Promoter (<=1kb)	TRUE	2.31555		CFAP97	1.8391
ENSG00000103034	NDRG4	1.66015	5.41823e-07	chr16	58494948	58495743	0.65	0.0159	Promoter (<=1kb)	TRUE	2.31015		FAM221B	1.83617
ENSG00000049759	NEDD4L	1.71911	9.9136e-15	chr18	58091146	58091654	0.59	0.0482	Promoter (<=1kb)	TRUE	2.30911		FADS1	1.83365
ENSG00000168918	INPP5D	1.57154	8.23867e-05	chr2	233121926	233122540	0.73	0.0294	Promoter (<=1kb)	TRUE	2.30154		TACC3	1.8172
ENSG00000172403	SYNPO2	1.19257	0.0383712	chr4	118850442	118851305	1.1	0.00152	Promoter (<=1kb)	TRUE	2.29257		PLSCR1	1.80638
ENSG00000155275	TRMT44	1.39221	5.30198e-08	chr4	8451173	8452206	0.89	0.00407	Promoter (2-3kb)	TRUE	2.28221		HPF1	1.79629
ENSG00000092969	TGFB2	1.22147	0.0202083	chr1	218347488	218348479	1.06	0.00244	Promoter (<=1kb)	TRUE	2.28147		CDC42EP3	1.79407
ENSG00000122705	CLTA	1.46159	1.67077e-23	chr9	36190089	36191219	0.79	0.00581	Promoter (<=1kb)	TRUE	2.25159		LZTR1	1.77321
ENSG00000055332	EIF2AK2	1.56287	1.25938e-23	chr2	37156204	37157215	0.68	0.0137	Promoter (<=1kb)	TRUE	2.24287		NR4A2	1.75374
ENSG00000077942	FBLN1	1.09003	9.0729e-14	chr22	45499704	45501029	1.15	5.32e-05	Promoter (1-2kb)	TRUE	2.24003		ING2	1.75316
ENSG00000152818	UTRN	1.11544	0.00021848	chr6	144286871	144287447	1.1	0.0036	Promoter (1-2kb)	TRUE	2.21544		ATP10D	1.75143
ENSG00000120159	CAAP1	1.17748	1.04315e-08	chr9	26892108	26892979	1.03	0.000869	Promoter (<=1kb)	TRUE	2.20748		TYRO3	1.69228
ENSG00000132680	KHDC4	1.03661	1.17937e-12	chr1	155923109	155923789	1.17	6.22e-06	Promoter (1-2kb)	TRUE	2.20661		AC145146.1	1.68605
ENSG00000152104	PTPN14	1.57481	2.16693e-39	chr1	214551210	214552773	0.63	0.0462	Promoter (<=1kb)	TRUE	2.20481		DIEXF	1.65154
ENSG00000115970	THADA	1.20259	4.82679e-15	chr2	43462930	43463877	0.98	0.00152	Promoter (<=1kb)	TRUE	2.18259		NOP14-AS1	1.63359
ENSG00000101773	RBBP8	1.20525	2.23703e-10	chr18	22797967	22798993	0.96	0.0419	Promoter (<=1kb)	TRUE	2.16525		UBE2K	1.629
ENSG00000137261	KIAA0319	1.52577	0.0264669	chr6	24645792	24647208	0.63	0.031	Promoter (<=1kb)	TRUE	2.15577		Grand Total	13.4663
ENSG00000198729	PPP1R14C	1.05548	1.88076e-08	chr6	150145994	150146706	1.1	0.000842	Promoter (2-3kb)	TRUE	2.15548
ENSG00000271781	AC026740.1	1.29195	3.86019e-07	chr5	672371	673055	0.83	0.00495	Promoter (2-3kb)	TRUE	2.12195
ENSG00000085998	POMGNT1	1.29855	1.85028e-14	chr1	46187537	46189085	0.82	0.00904	Promoter (<=1kb)	TRUE	2.11855
ENSG00000147889	CDKN2A	1.10756	6.56597e-14	chr9	21994101	21995941	1.01	0.000434	Promoter (<=1kb)	TRUE	2.11756
ENSG00000114450	GNB4	1.13581	3.77458e-06	chr3	179451178	179452428	0.97	0.00128	Promoter (<=1kb)	TRUE	2.10581
ENSG00000020577	SAMD4A	1.43122	4.98086e-10	chr14	54652104	54652674	0.66	0.0383	Promoter (<=1kb)	TRUE	2.09122
ENSG00000242795	AC007849.1	1.19674	0.00352506	chr3	169623932	169625116	0.89	0.00573	Promoter (<=1kb)	TRUE	2.08674
ENSG00000186088	GSAP	1.19561	0.0049034	chr7	77416015	77416785	0.89	0.00391	Promoter (<=1kb)	TRUE	2.08561
ENSG00000160767	FAM189B	1.2151	4.32975e-16	chr1	155255283	155256154	0.86	0.00205	Promoter (<=1kb)	TRUE	2.0751
ENSG00000173706	HEG1	1.32004	6.57884e-09	chr3	125055996	125056439	0.75	0.0425	Promoter (<=1kb)	TRUE	2.07004
ENSG00000183067	IGSF5	1.40274	0.0299002	chr21	39791223	39791702	0.66	0.0357	Promoter (<=1kb)	TRUE	2.06274
ENSG00000236008	LINC01814	1.27882	0.0292497	chr2	8573292	8574852	0.78	0.0231	Promoter (<=1kb)	TRUE	2.05882
ENSG00000168679	SLC16A4	1.4185	2.95285e-12	chr1	110390214	110391363	0.63	0.0246	Promoter (<=1kb)	TRUE	2.0485
ENSG00000164976	MYORG	1.35785	3.82079e-09	chr9	34376528	34377313	0.69	0.0199	Promoter (<=1kb)	TRUE	2.04785
ENSG00000249550	LINC01234	1.25736	6.62453e-06	chr12	113773308	113774091	0.78	0.0036	Promoter (<=1kb)	TRUE	2.03736
ENSG00000018189	RUFY3	1.21568	1.52866e-14	chr4	70704060	70705998	0.8	0.00637	Promoter (<=1kb)	TRUE	2.01568
ENSG00000198680	TUSC1	1.28037	8.96467e-06	chr9	25677386	25678807	0.72	0.0177	Promoter (<=1kb)	TRUE	2.00037
ENSG00000128487	SPECC1	1.05652	7.66624e-12	chr17	20206204	20206840	0.94	0.00679	Promoter (<=1kb)	TRUE	1.99652
ENSG00000085998	POMGNT1	1.29855	1.85028e-14	chr1	46197846	46198918	0.69	0.0178	Promoter (<=1kb)	TRUE	1.98855
ENSG00000236008	LINC01814	1.27882	0.0292497	chr2	8583405	8584333	0.69	0.0213	Promoter (<=1kb)	TRUE	1.96882
ENSG00000100065	CARD10	1.00287	3.83642e-05	chr22	37492323	37493087	0.95	0.00234	Promoter (1-2kb)	TRUE	1.95287
ENSG00000234616	JRK	1.11835	1.40426e-14	chr8	142681409	142682080	0.8	0.0186	Promoter (<=1kb)	TRUE	1.91835
ENSG00000165685	TMEM52B	1.23653	9.8652e-13	chr12	10175390	10176531	0.66	0.0457	Promoter (2-3kb)	TRUE	1.89653
ENSG00000171843	MLLT3	1.14139	1.92057e-05	chr9	20621831	20623186	0.75	0.00887	Promoter (<=1kb)	TRUE	1.89139
ENSG00000111405	ENDOU	1.12138	0.000101741	chr12	47725363	47726146	0.77	0.0194	Promoter (<=1kb)	TRUE	1.89138
ENSG00000171843	MLLT3	1.14139	1.92057e-05	chr9	20624494	20624994	0.74	0.0357	Promoter (1-2kb)	TRUE	1.88139
ENSG00000169242	EFNA1	1.17035	2.5993e-15	chr1	155124285	155125015	0.71	0.0181	Promoter (2-3kb)	TRUE	1.88035
ENSG00000101276	SLC52A3	1.01496	0.000788767	chr20	775615	776349	0.86	0.00601	Promoter (<=1kb)	TRUE	1.87496
ENSG00000117009	KMO	1.14929	0.000201143	chr1	241531364	241532183	0.72	0.0263	Promoter (<=1kb)	TRUE	1.86929
ENSG00000154274	C4orf19	1.19868	3.79264e-05	chr4	37583718	37584661	0.67	0.0274	Promoter (<=1kb)	TRUE	1.86868
ENSG00000166311	SMPD1	1.20194	0.000443694	chr11	6389797	6390659	0.66	0.0235	Promoter (<=1kb)	TRUE	1.86194
ENSG00000086102	NFX1	1.2584	9.089e-23	chr9	33290044	33291122	0.6	0.037	Promoter (<=1kb)	TRUE	1.8584
ENSG00000170390	DCLK2	1.12376	3.23009e-12	chr4	150078172	150078840	0.73	0.0268	Promoter (<=1kb)	TRUE	1.85376
ENSG00000164323	CFAP97	1.0891	6.46429e-08	chr4	185209152	185209631	0.75	0.0272	Promoter (<=1kb)	TRUE	1.8391
ENSG00000204930	FAM221B	1.06617	0.0105796	chr9	35826118	35826620	0.77	0.0205	Promoter (1-2kb)	TRUE	1.83617
ENSG00000170390	DCLK2	1.12376	3.23009e-12	chr4	150080264	150081339	0.71	0.034	Promoter (1-2kb)	TRUE	1.83376
ENSG00000149485	FADS1	1.06365	0.0135589	chr11	61814741	61815860	0.77	0.02	Promoter (<=1kb)	TRUE	1.83365
ENSG00000013810	TACC3	1.1272	6.67074e-10	chr4	1726298	1727912	0.69	0.0426	Promoter (<=1kb)	TRUE	1.8172
ENSG00000188313	PLSCR1	1.02638	0.00596174	chr3	146544231	146544982	0.78	0.0038	Promoter (<=1kb)	TRUE	1.80638
ENSG00000056050	HPF1	1.16629	0.000239195	chr4	169757468	169758252	0.63	0.0489	Promoter (<=1kb)	TRUE	1.79629
ENSG00000163171	CDC42EP3	1.11407	1.33988e-15	chr2	37643820	37644842	0.68	0.0248	Promoter (2-3kb)	TRUE	1.79407
ENSG00000099949	LZTR1	1.08321	3.38209e-16	chr22	20981881	20982560	0.69	0.0128	Promoter (<=1kb)	TRUE	1.77321
ENSG00000153234	NR4A2	1.01374	2.86125e-08	chr2	156341559	156342863	0.74	0.00944	Promoter (<=1kb)	TRUE	1.75374
ENSG00000168556	ING2	1.12316	0.00236107	chr4	183505889	183506431	0.63	0.0304	Promoter (<=1kb)	TRUE	1.75316
ENSG00000145246	ATP10D	1.06143	0.041694	chr4	47485113	47485661	0.69	0.0385	Promoter (<=1kb)	TRUE	1.75143
ENSG00000092445	TYRO3	1.05228	2.10027e-10	chr15	41557699	41559276	0.64	0.0422	Promoter (<=1kb)	TRUE	1.69228
ENSG00000249295	AC145146.1	1.06605	0.0405207	chr5	69499828	69500591	0.62	0.034	Promoter (1-2kb)	TRUE	1.68605
ENSG00000117597	DIEXF	1.06154	3.41844e-08	chr1	209827353	209828635	0.59	0.0415	Promoter (<=1kb)	TRUE	1.65154
ENSG00000249673	NOP14-AS1	1.04359	0.0305723	chr4	2936926	2937715	0.59	0.0455	Promoter (<=1kb)	TRUE	1.63359
ENSG00000078140	UBE2K	1.049	1.41954e-08	chr4	39697592	39698752	0.58	0.0469	Promoter (<=1kb)	TRUE	1.629

## Sheet: UP - CLOSED
This tab contains data where the RNA expression values are positive and ATAC-seq peak values are negative e.g., gene expression = inaccessible chromatin
geneId	gene_name	RNAseq_log2FC	RNAseq_padj	chr	peak_start	peak_end	ATACseq_log2FC	ATAC_padj	peak_annotation	Sig & Fold for RNA & ATAC	Combined Ranking		Row Labels	Sum of Combined Ranking
ENSG00000212901	KRTAP3-1	6.83284	6.48828e-07	chr17	41020408	41020783	-0.92	0.00324	Promoter (1-2kb)	TRUE	5.91284		KRTAP3-1	5.91284
ENSG00000272068	AL365181.2	4.13066	4.9793e-54	chr1	156639665	156640331	-0.94	0.000736	Promoter (<=1kb)	TRUE	3.19066		AL365181.2	3.19066
ENSG00000125144	MT1G	3.35334	8.40594e-05	chr16	56665144	56665591	-1.32	0.00153	Promoter (2-3kb)	TRUE	2.03334		MT1G	2.03334
ENSG00000146592	CREB5	2.89543	1.09991e-24	chr7	28487960	28488565	-1.16	0.00163	Promoter (2-3kb)	TRUE	1.73543		CREB5	1.73543
ENSG00000267530	LINC01836	2.46746	0.001298	chr19	782274	783330	-0.81	0.0187	Promoter (<=1kb)	TRUE	1.65746		LINC01836	1.65746
ENSG00000274427	AC145423.2	2.34944	6.0977e-05	chr12	123516269	123516484	-0.71	0.0189	Promoter (<=1kb)	TRUE	1.63944		AC145423.2	1.63944
ENSG00000149043	SYT8	2.33119	5.6859e-29	chr11	1826770	1827440	-0.91	0.00576	Promoter (<=1kb)	TRUE	1.42119		SYT8	1.42119
ENSG00000132470	ITGB4	2.3796	6.30056e-33	chr17	75755563	75756247	-1.01	0.00466	Promoter (<=1kb)	TRUE	1.3696		ITGB4	1.3696
ENSG00000092758	COL9A3	1.94862	8.27105e-10	chr20	62819344	62820068	-0.64	0.0206	Promoter (1-2kb)	TRUE	1.30862		COL9A3	1.30862
ENSG00000281406	BLACAT1	2.38785	0.00121787	chr1	205440300	205441498	-1.16	3.45e-05	Promoter (2-3kb)	TRUE	1.22785		BLACAT1	1.22785
ENSG00000124126	PREX1	2.41077	9.98878e-32	chr20	48824738	48825390	-1.22	0.000115	Promoter (2-3kb)	TRUE	1.19077		PREX1	1.19077
ENSG00000101439	CST3	1.64972	5.86302e-16	chr20	23635230	23635894	-0.68	0.0329	Promoter (2-3kb)	TRUE	0.969723		CST3	0.969723
ENSG00000234616	JRK	1.11835	1.40426e-14	chr8	142662119	142662790	-2.07	3.62e-10	Promoter (<=1kb)	TRUE	0.95165		JRK	0.95165
ENSG00000215386	MIR99AHG	1.99548	1.06416e-11	chr21	16069943	16070624	-1.07	0.00616	Promoter (<=1kb)	TRUE	0.925476		MIR99AHG	0.925476
ENSG00000138185	ENTPD1	1.95508	5.25441e-17	chr10	95841886	95842347	-1.07	0.0323	Promoter (2-3kb)	TRUE	0.885078		ENTPD1	0.885078
ENSG00000069702	TGFBR3	2.28686	5.80303e-10	chr1	91864335	91864744	-1.41	0.00567	Promoter (2-3kb)	TRUE	0.876856		TGFBR3	0.876856
ENSG00000103197	TSC2	1.04606	8.0523e-16	chr16	2082163	2082516	-1.82	3.46e-07	Promoter (<=1kb)	TRUE	0.773943		TSC2	0.773943
ENSG00000159387	IRX6	1.70565	1.50146e-08	chr16	55328043	55328851	-2.36	6.14e-13	Promoter (2-3kb)	TRUE	0.654348		IRX6	0.654348
ENSG00000223396	RPS10P7	1.57568	2.41594e-17	chr1	201517698	201518319	-1	0.000833	Promoter (<=1kb)	TRUE	0.575683		RPS10P7	0.575683
ENSG00000267383	AC011447.3	1.16457	0.000391104	chr19	20237537	20238636	-0.62	0.0168	Promoter (<=1kb)	TRUE	0.544567		AC011447.3	0.544567
ENSG00000205436	EXOC3L4	1.32549	3.5051e-05	chr14	103100030	103101043	-0.8	0.022	Promoter (<=1kb)	TRUE	0.525486		EXOC3L4	0.525486
ENSG00000101773	RBBP8	1.20525	2.23703e-10	chr18	22913606	22914175	-0.7	0.0194	Promoter (<=1kb)	TRUE	0.505248		RBBP8	0.505248
ENSG00000160957	RECQL4	1.46383	4.69433e-13	chr8	144514996	144515358	-0.96	0.00747	Promoter (<=1kb)	TRUE	0.503832		RECQL4	0.503832
ENSG00000240280	TCAM1P	1.19801	0.0376498	chr17	63856886	63857426	-0.73	0.0436	Promoter (<=1kb)	TRUE	0.468011		TCAM1P	0.468011
ENSG00000127129	EDN2	1.90413	8.85318e-09	chr1	41482540	41483729	-1.45	2.7e-05	Promoter (<=1kb)	TRUE	0.454132		EDN2	0.454132
ENSG00000094804	CDC6	1.26541	6.37958e-16	chr17	40303119	40303580	-0.85	0.00854	Promoter (2-3kb)	TRUE	0.415405		CDC6	0.415405
ENSG00000009830	POMT2	1.28066	2.42691e-13	chr14	77301006	77301319	-0.87	0.014	Promoter (<=1kb)	TRUE	0.410657		POMT2	0.410657
ENSG00000151224	MAT1A	1.9286	1.87777e-06	chr10	80272813	80273038	-1.53	0.00068	Promoter (2-3kb)	TRUE	0.398596		MAT1A	0.398596
ENSG00000104738	MCM4	1.14425	1.14896e-13	chr8	47959929	47961655	-0.75	0.0149	Promoter (<=1kb)	TRUE	0.394254		MCM4	0.394254
ENSG00000280007	AC008079.2	1.00191	0.00095787	chr22	18133396	18134007	-1.38	0.00173	Promoter (2-3kb)	TRUE	0.378089		AC008079.2	0.378089
ENSG00000153404	PLEKHG4B	1.423	1.56675e-08	chr5	169398	169905	-1.05	0.00162	Promoter (<=1kb)	TRUE	0.372995		PLEKHG4B	0.372995
ENSG00000123933	MXD4	1.08394	6.33565e-06	chr4	2255449	2256244	-1.44	2.25e-05	Promoter (<=1kb)	TRUE	0.356063		MXD4	0.356063
ENSG00000188064	WNT7B	1.15248	8.9712e-17	chr22	45974496	45974853	-0.83	0.00862	Promoter (1-2kb)	TRUE	0.32248		WNT7B	0.32248
ENSG00000165724	ZMYND19	1.07945	7.51729e-18	chr9	137592555	137593415	-1.4	4.66e-06	Promoter (2-3kb)	TRUE	0.320553		ZMYND19	0.320553
ENSG00000279110	AL022323.4	1.44178	9.29335e-13	chr22	25064912	25065428	-1.75	8.63e-08	Promoter (<=1kb)	TRUE	0.308216		AL022323.4	0.308216
ENSG00000177311	ZBTB38	1.1515	4.95618e-11	chr3	141425988	141426893	-0.86	0.00503	Promoter (<=1kb)	TRUE	0.291496		ZBTB38	0.291496
ENSG00000183067	IGSF5	1.40274	0.0299002	chr21	39750586	39751232	-1.12	0.00101	Promoter (<=1kb)	TRUE	0.282736		IGSF5	0.282736
ENSG00000163171	CDC42EP3	1.11407	1.33988e-15	chr2	37689100	37690005	-0.84	0.00442	Promoter (<=1kb)	TRUE	0.274066		CDC42EP3	0.274066
ENSG00000276653	RN7SL856P	1.63387	0.0243142	chr2	25059151	25059553	-1.36	0.000382	Promoter (1-2kb)	TRUE	0.273872		RN7SL856P	0.273872
ENSG00000173727	AP000769.1	1.06301	9.74831e-17	chr11	65454030	65455665	-0.83	0.00429	Promoter (<=1kb)	TRUE	0.233009		AP000769.1	0.233009
ENSG00000004866	ST7	1.26867	1.59267e-12	chr7	117097979	117098418	-1.43	6.66e-05	Promoter (1-2kb)	TRUE	0.161329		ST7	0.161329
ENSG00000176896	TCEANC	1.02058	0.00808034	chrX	13658730	13659346	-0.86	0.0147	Promoter (<=1kb)	TRUE	0.160582		TCEANC	0.160582
ENSG00000028528	SNX1	1.11741	6.89809e-11	chr15	64133711	64134738	-1.25	7.38e-05	Promoter (<=1kb)	TRUE	0.132592		SNX1	0.132592
ENSG00000091436	MAP3K20	1.60726	9.3762e-27	chr2	173159827	173160025	-1.73	8.75e-06	Promoter (<=1kb)	TRUE	0.122737		MAP3K20	0.122737
ENSG00000198353	HOXC4	1.40946	1.57781e-06	chr12	54038565	54039149	-1.53	0.0248	Promoter (<=1kb)	TRUE	0.120536		HOXC4	0.120536
ENSG00000128973	CLN6	1.16275	2.22938e-12	chr15	68257102	68257529	-1.25	3.19e-05	Promoter (<=1kb)	TRUE	0.0872542		CLN6	0.0872542
ENSG00000180806	HOXC9	1.21581	4.84623e-15	chr12	53999531	54000504	-1.3	0.000528	Promoter (<=1kb)	TRUE	0.0841853		HOXC9	0.0841853
ENSG00000117480	FAAH	1.41642	9.04533e-15	chr1	46396290	46396956	-1.34	6.74e-05	Promoter (1-2kb)	TRUE	0.076424		FAAH	0.076424
ENSG00000104691	UBXN8	1.04052	4.05922e-06	chr8	30735720	30736219	-0.98	0.0318	Promoter (2-3kb)	TRUE	0.060524		UBXN8	0.060524
													Grand Total	38.3399

## Sheet: DOWN - OPEN
This tab contains data where the RNA expression values are negative and ATAC-seq peak values are positive e.g., low gene expression = accessible chromatin
geneId	gene_name	RNAseq_log2FC	RNAseq_padj	chr	peak_start	peak_end	ATACseq_log2FC	ATAC_padj	peak_annotation	Sig & Fold for RNA & ATAC	Combined Ranking		Row Labels	Max. of Combined Ranking
ENSG00000144119	C1QL2	-6.8403	9.22035e-07	chr2	119155707	119156453	1.83	6.18e-07	Promoter (2-3kb)	TRUE	8.6703		C1QL2	8.6703
ENSG00000123191	ATP7B	-2.36836	6.04128e-07	chr13	51934583	51934947	3.14	1.36e-11	Promoter (<=1kb)	TRUE	5.50836		ATP7B	5.50836
ENSG00000121753	ADGRB2	-1.58108	0.00225947	chr1	31739143	31739563	3.42	3.8e-10	Promoter (<=1kb)	TRUE	5.00108		ADGRB2	5.00108
ENSG00000176463	SLCO3A1	-3.53766	3.28527e-25	chr15	92158112	92158819	1	0.00164	Promoter (2-3kb)	TRUE	4.53766		SLCO3A1	4.53766
ENSG00000092621	PHGDH	-3.32418	2.92717e-43	chr1	119660151	119660686	1.17	0.00656	Promoter (<=1kb)	TRUE	4.49418		PHGDH	4.49418
ENSG00000175832	ETV4	-3.45715	4.49377e-40	chr17	43578703	43579802	0.78	0.0128	Promoter (<=1kb)	TRUE	4.23715		ETV4	4.23715
ENSG00000021762	OSBPL5	-2.36209	3.47013e-61	chr11	3095908	3096137	1.78	3.2e-06	Promoter (1-2kb)	TRUE	4.14209		OSBPL5	4.14209
ENSG00000167971	CASKIN1	-3.11082	1.00591e-16	chr16	2194395	2195097	0.75	0.0401	Promoter (1-2kb)	TRUE	3.86082		CASKIN1	3.86082
ENSG00000158321	AUTS2	-2.89522	1.67187e-88	chr7	70787782	70788841	0.94	0.000461	Promoter (<=1kb)	TRUE	3.83522		AUTS2	3.83522
ENSG00000197444	OGDHL	-2.8491	1.08176e-22	chr10	49740710	49741661	0.95	0.00623	Promoter (1-2kb)	TRUE	3.7991		OGDHL	3.7991
ENSG00000182600	SNORC	-1.31941	0.0109032	chr2	232856486	232856888	2.39	6.24e-11	Promoter (<=1kb)	TRUE	3.70941		SNORC	3.70941
ENSG00000166503	HDGFL3	-1.98716	3.9551e-11	chr15	83156126	83156623	1.72	0.000343	Promoter (1-2kb)	TRUE	3.70716		HDGFL3	3.70716
ENSG00000124788	ATXN1	-1.15545	4.05307e-08	chr6	16747316	16747546	2.54	1.54e-07	Promoter (2-3kb)	TRUE	3.69545		ATXN1	3.69545
ENSG00000070601	FRMPD1	-2.53121	2.91188e-13	chr9	37650715	37651380	1.16	0.000324	Promoter (<=1kb)	TRUE	3.69121		FRMPD1	3.69121
ENSG00000021762	OSBPL5	-2.36209	3.47013e-61	chr11	3100864	3101246	1.24	0.0052	Promoter (1-2kb)	TRUE	3.60209		ARHGEF40	3.57437
ENSG00000165801	ARHGEF40	-1.66437	7.23696e-05	chr14	21087393	21087914	1.91	2.6e-09	Promoter (<=1kb)	TRUE	3.57437		DENND5B	3.46521
ENSG00000170456	DENND5B	-1.60521	0.000107016	chr12	31494541	31494797	1.86	3.05e-08	Promoter (1-2kb)	TRUE	3.46521		PIGR	3.45222
ENSG00000162896	PIGR	-2.19222	0.00147638	chr1	206941911	206942319	1.26	0.00113	Promoter (2-3kb)	TRUE	3.45222		KIAA1324	3.3536
ENSG00000116299	KIAA1324	-2.5636	7.88102e-14	chr1	109201008	109201508	0.79	0.0294	Promoter (<=1kb)	TRUE	3.3536		INPP5J	3.33325
ENSG00000185133	INPP5J	-1.24325	1.91174e-10	chr22	31127316	31127838	2.09	6.68e-14	Promoter (<=1kb)	TRUE	3.33325		ZSWIM4	3.32325
ENSG00000132003	ZSWIM4	-1.02325	1.15703e-08	chr19	13817441	13818504	2.3	2.28e-16	Promoter (<=1kb)	TRUE	3.32325		GGT1	3.24281
ENSG00000100031	GGT1	-1.58281	1.00591e-16	chr22	24629120	24629505	1.66	5.98e-05	Promoter (1-2kb)	TRUE	3.24281		PLIN5	3.16463
ENSG00000214456	PLIN5	-2.41463	0.00383233	chr19	4534951	4535524	0.75	0.0283	Promoter (<=1kb)	TRUE	3.16463		ASAP3	3.16378
ENSG00000088280	ASAP3	-2.47378	3.83218e-36	chr1	23436610	23436978	0.69	0.0409	Promoter (<=1kb)	TRUE	3.16378		APBB2	3.12587
ENSG00000163697	APBB2	-1.09587	2.46668e-06	chr4	40931150	40931916	2.03	6.69e-07	Promoter (2-3kb)	TRUE	3.12587		CATSPERB	3.11809
ENSG00000133962	CATSPERB	-2.41809	5.52287e-09	chr14	91732350	91733288	0.7	0.0499	Promoter (<=1kb)	TRUE	3.11809		FA2H	3.10942
ENSG00000103089	FA2H	-1.24942	0.000484404	chr16	74725892	74726436	1.86	3.08e-07	Promoter (<=1kb)	TRUE	3.10942		TMEM120B	3.08083
ENSG00000188735	TMEM120B	-1.78083	2.30125e-25	chr12	121709501	121709992	1.3	0.000113	Promoter (2-3kb)	TRUE	3.08083		ALDH1A3	3.03719
ENSG00000184254	ALDH1A3	-1.09719	2.63907e-09	chr15	100877633	100877980	1.94	5.3e-10	Promoter (<=1kb)	TRUE	3.03719		MYO15B	3.00476
ENSG00000266714	MYO15B	-2.09476	4.45567e-28	chr17	75600823	75601712	0.91	0.0016	Promoter (<=1kb)	TRUE	3.00476		TANC1	2.91557
ENSG00000115183	TANC1	-1.07557	8.78723e-07	chr2	159137574	159138094	1.84	0.00244	Promoter (1-2kb)	TRUE	2.91557		PLPPR2	2.82416
ENSG00000105520	PLPPR2	-1.09416	0.000725411	chr19	11361494	11361991	1.73	1.03e-05	Promoter (<=1kb)	TRUE	2.82416		PLEKHG1	2.78391
ENSG00000120278	PLEKHG1	-1.91391	9.25914e-10	chr6	150685967	150686191	0.87	0.0285	Promoter (<=1kb)	TRUE	2.78391		BDH1	2.76168
ENSG00000103089	FA2H	-1.24942	0.000484404	chr16	74743547	74744224	1.52	4.91e-06	Promoter (2-3kb)	TRUE	2.76942		SUSD2	2.74425
ENSG00000161267	BDH1	-1.66168	0.00271082	chr3	197516573	197517035	1.1	0.00103	Promoter (<=1kb)	TRUE	2.76168		TMC5	2.70705
ENSG00000099994	SUSD2	-1.90425	3.89064e-38	chr22	24183509	24183801	0.84	0.00555	Promoter (<=1kb)	TRUE	2.74425		GYS1	2.66452
ENSG00000103534	TMC5	-1.74705	0.00640331	chr16	19483865	19484452	0.96	0.01	Promoter (2-3kb)	TRUE	2.70705		MLPH	2.59582
ENSG00000104812	GYS1	-1.02452	2.93487e-10	chr19	48976111	48976617	1.64	5.59e-07	Promoter (1-2kb)	TRUE	2.66452		NT5C2	2.55157
ENSG00000115648	MLPH	-1.50582	2.01145e-17	chr2	237541373	237541688	1.09	0.0227	Promoter (<=1kb)	TRUE	2.59582		TMEM123	2.51131
ENSG00000076685	NT5C2	-1.53157	4.58223e-10	chr10	103183986	103184769	1.02	0.000482	Promoter (2-3kb)	TRUE	2.55157		KSR1	2.50897
ENSG00000152558	TMEM123	-1.06131	7.79483e-11	chr11	102469005	102469536	1.45	1.03e-06	Promoter (<=1kb)	TRUE	2.51131		ZNF217	2.48353
ENSG00000141068	KSR1	-1.65897	1.38748e-10	chr17	27473655	27474122	0.85	0.0368	Promoter (1-2kb)	TRUE	2.50897		RCAN1	2.40498
ENSG00000171940	ZNF217	-1.13353	6.98436e-15	chr20	53609835	53610364	1.35	2.47e-06	Promoter (<=1kb)	TRUE	2.48353		UPB1	2.38728
ENSG00000103089	FA2H	-1.24942	0.000484404	chr16	74740965	74741236	1.18	0.000151	Promoter (<=1kb)	TRUE	2.42942		PROM1	2.38521
ENSG00000159200	RCAN1	-1.50498	5.58867e-18	chr21	34561952	34562301	0.9	0.0124	Promoter (1-2kb)	TRUE	2.40498		DAPK2	2.37704
ENSG00000100024	UPB1	-1.68728	1.94324e-05	chr22	24520999	24522182	0.7	0.0335	Promoter (<=1kb)	TRUE	2.38728		PIK3R1	2.3138
ENSG00000007062	PROM1	-1.28521	0.0018132	chr4	16078202	16079346	1.1	0.000512	Promoter (1-2kb)	TRUE	2.38521		MYO5B	2.22128
ENSG00000035664	DAPK2	-1.47704	0.000550497	chr15	64071485	64072189	0.9	0.00429	Promoter (<=1kb)	TRUE	2.37704		2009-09-01	2.21441
ENSG00000145675	PIK3R1	-1.1938	0.00774794	chr5	68295555	68296343	1.12	6.09e-05	Promoter (2-3kb)	TRUE	2.3138		BMP1	2.18379
ENSG00000124788	ATXN1	-1.15545	4.05307e-08	chr6	16751343	16751624	1.15	0.00272	Promoter (1-2kb)	TRUE	2.30545		CNGA1	2.16287
ENSG00000167306	MYO5B	-1.34128	1.01767e-12	chr18	49849493	49850097	0.88	0.00335	Promoter (<=1kb)	TRUE	2.22128		C2CD2	2.09956
ENSG00000184640	2009-09-01	-1.01441	9.82082e-12	chr17	77325049	77325590	1.2	0.000164	Promoter (1-2kb)	TRUE	2.21441		ARHGEF10L	2.08995
ENSG00000168487	BMP1	-1.12379	2.944e-06	chr8	22176358	22176841	1.06	0.0122	Promoter (2-3kb)	TRUE	2.18379		RARA	2.08397
ENSG00000198515	CNGA1	-1.18287	0.0459442	chr4	47972481	47973055	0.98	0.0182	Promoter (1-2kb)	TRUE	2.16287		GTF2IRD1	2.08016
ENSG00000145675	PIK3R1	-1.1938	0.00774794	chr5	68277381	68277736	0.92	0.00999	Promoter (2-3kb)	TRUE	2.1138		SORL1	2.05386
ENSG00000157617	C2CD2	-1.01956	1.27735e-11	chr21	41954130	41954452	1.08	0.000199	Promoter (<=1kb)	TRUE	2.09956		HSPA12A	1.99228
ENSG00000074964	ARHGEF10L	-1.11995	8.31091e-07	chr1	17538056	17538971	0.97	0.00326	Promoter (<=1kb)	TRUE	2.08995		BIN1	1.9503
ENSG00000131759	RARA	-1.16397	8.76854e-19	chr17	40345486	40345991	0.92	0.00634	Promoter (<=1kb)	TRUE	2.08397		MAP3K5	1.93709
ENSG00000006704	GTF2IRD1	-1.12016	2.27142e-11	chr7	74545203	74545471	0.96	0.0135	Promoter (<=1kb)	TRUE	2.08016		WDR31	1.8814
ENSG00000137642	SORL1	-1.04386	9.84362e-15	chr11	121614673	121615178	1.01	0.0131	Promoter (<=1kb)	TRUE	2.05386		ABCA4	1.87631
ENSG00000104812	GYS1	-1.02452	2.93487e-10	chr19	48983638	48983903	1	0.00496	Promoter (1-2kb)	TRUE	2.02452		SLC44A4	1.76182
ENSG00000165868	HSPA12A	-1.24228	1.95348e-08	chr10	116849337	116849849	0.75	0.0432	Promoter (<=1kb)	TRUE	1.99228		SLC25A37	1.7439
ENSG00000136717	BIN1	-1.2203	6.29861e-09	chr2	127064723	127065236	0.73	0.00977	Promoter (<=1kb)	TRUE	1.9503		Grand Total	8.6703
ENSG00000197442	MAP3K5	-1.07709	0.000166296	chr6	136582799	136583740	0.86	0.00277	Promoter (<=1kb)	TRUE	1.93709
ENSG00000148225	WDR31	-1.0414	0.030034	chr9	113341752	113342204	0.84	0.0126	Promoter (1-2kb)	TRUE	1.8814
ENSG00000198691	ABCA4	-1.14631	0.00193369	chr1	94117181	94118753	0.73	0.02	Promoter (2-3kb)	TRUE	1.87631
ENSG00000163697	APBB2	-1.09587	2.46668e-06	chr4	41216335	41216952	0.77	0.00426	Promoter (<=1kb)	TRUE	1.86587
ENSG00000204385	SLC44A4	-1.08182	0.0367797	chr6	31874387	31875573	0.68	0.0386	Promoter (2-3kb)	TRUE	1.76182
ENSG00000147454	SLC25A37	-1.1539	1.65703e-08	chr8	23566671	23567727	0.59	0.04	Promoter (<=1kb)	TRUE	1.7439

## Sheet: DOWN - CLOSED
This tab contains data where the RNA expression and ATAC-seq peak values are negative e.g., low gene expression = inaccessible chromatin
geneId	gene_name	RNAseq_log2FC	RNAseq_padj	chr	peak_start	peak_end	ATACseq_log2FC	ATAC_padj	peak_annotation	Sig & Fold for RNA & ATAC	Combined Ranking		Row Labels	Max. of Combined Ranking
ENSG00000183888	SRARP	-7.41356	2.89518e-08	chr1	16004053	16004294	-5.09	1.61e-11	Promoter (<=1kb)	TRUE	12.5036		SRARP	12.5036
ENSG00000173175	ADCY5	-6.96873	1.07183e-64	chr3	123406709	123406968	-3.48	2.37e-17	Promoter (2-3kb)	TRUE	10.4487		ADCY5	10.4487
ENSG00000173175	ADCY5	-6.96873	1.07183e-64	chr3	123451078	123451474	-2.68	1.49e-11	Promoter (1-2kb)	TRUE	9.64873		LINC01287	9.38466
ENSG00000234722	LINC01287	-7.15466	4.21097e-15	chr7	153413466	153414444	-2.23	0.000532	Promoter (<=1kb)	TRUE	9.38466		VLDLR	9.35099
ENSG00000147852	VLDLR	-5.87099	2.06871e-15	chr9	2621401	2622012	-3.48	2.36e-13	Promoter (<=1kb)	TRUE	9.35099		THRSP	9.19007
ENSG00000151365	THRSP	-6.19007	5.61155e-09	chr11	78063487	78063902	-3	4.01e-06	Promoter (<=1kb)	TRUE	9.19007		RPL7P19	9.08416
ENSG00000241458	RPL7P19	-4.06416	5.26823e-51	chr5	138469755	138471775	-5.02	1.33e-24	Promoter (1-2kb)	TRUE	9.08416		AL512622.1	8.58033
ENSG00000235010	AL512622.1	-7.47033	2.31135e-08	chr10	132185684	132185940	-1.11	0.00104	Promoter (<=1kb)	TRUE	8.58033		PLEKHH1	8.45429
ENSG00000054690	PLEKHH1	-5.09429	2.97823e-182	chr14	67566179	67567968	-3.36	4.87e-27	Promoter (1-2kb)	TRUE	8.45429		SMIM33	7.96889
ENSG00000283288	SMIM33	-4.70889	1.88836e-44	chr5	139468529	139469094	-3.26	1.59e-16	Promoter (1-2kb)	TRUE	7.96889		TBATA	7.91845
ENSG00000166220	TBATA	-5.85845	0.000180069	chr10	70774813	70775893	-2.06	4.1e-13	Promoter (2-3kb)	TRUE	7.91845		SLPI	7.91066
ENSG00000124107	SLPI	-5.22066	1.38612e-20	chr20	45253888	45255122	-2.69	1.12e-23	Promoter (<=1kb)	TRUE	7.91066		TMEM229B	7.82335
ENSG00000198133	TMEM229B	-5.67335	2.00949e-27	chr14	67513720	67515168	-2.15	1.26e-14	Promoter (<=1kb)	TRUE	7.82335		COL18A1	7.69698
ENSG00000151365	THRSP	-6.19007	5.61155e-09	chr11	78061149	78062352	-1.6	0.00608	Promoter (1-2kb)	TRUE	7.79007		CSF3R	7.4749
ENSG00000182871	COL18A1	-3.32698	5.79197e-44	chr21	45455095	45455843	-4.37	5.95e-15	Promoter (<=1kb)	TRUE	7.69698		MZB1	7.27476
ENSG00000119535	CSF3R	-6.1849	3.59738e-74	chr1	36485697	36487474	-1.29	4.1e-06	Promoter (2-3kb)	TRUE	7.4749		ITPR1	7.26294
ENSG00000170476	MZB1	-5.11476	1.62741e-29	chr5	139388084	139388913	-2.16	1.19e-11	Promoter (<=1kb)	TRUE	7.27476		AC243960.3	7.25381
ENSG00000150995	ITPR1	-4.45294	6.24295e-13	chr3	4786246	4786979	-2.81	1.11e-19	Promoter (2-3kb)	TRUE	7.26294		CHST11	7.08048
ENSG00000268355	AC243960.3	-5.36381	1.14858e-05	chr19	41530812	41532056	-1.89	2.12e-13	Promoter (<=1kb)	TRUE	7.25381		RRAS2	6.95624
ENSG00000171310	CHST11	-2.98048	4.09012e-17	chr12	104458964	104459548	-4.1	1.27e-11	Promoter (1-2kb)	TRUE	7.08048		CALB2	6.90018
ENSG00000133818	RRAS2	-4.64624	1.85256e-24	chr11	14358045	14359299	-2.31	3.25e-13	Promoter (<=1kb)	TRUE	6.95624		BHLHE40	6.58932
ENSG00000172137	CALB2	-5.90018	5.65722e-07	chr16	71386611	71387409	-1	0.00117	Promoter (1-2kb)	TRUE	6.90018		AR	6.53873
ENSG00000172137	CALB2	-5.90018	5.65722e-07	chr16	71358380	71358919	-0.95	0.0115	Promoter (<=1kb)	TRUE	6.85018		SERPINA1	6.48347
ENSG00000054690	PLEKHH1	-5.09429	2.97823e-182	chr14	67533014	67533433	-1.63	6.73e-05	Promoter (<=1kb)	TRUE	6.72429		EPB41L3	6.43734
ENSG00000134107	BHLHE40	-3.72932	1.74118e-59	chr3	4978215	4979725	-2.86	2.9e-28	Promoter (<=1kb)	TRUE	6.58932		ST6GAL1	6.38307
ENSG00000169083	AR	-5.61873	1.65795e-70	chrX	67545739	67546935	-0.92	0.0095	Promoter (<=1kb)	TRUE	6.53873		DTX4	6.37222
ENSG00000197249	SERPINA1	-3.75347	4.20225e-09	chr14	94390300	94391083	-2.73	4.54e-29	Promoter (<=1kb)	TRUE	6.48347		TMEM42	6.34843
ENSG00000082397	EPB41L3	-4.58734	0.000398532	chr18	5629942	5630832	-1.85	6.16e-08	Promoter (<=1kb)	TRUE	6.43734		PPP1R1B	6.34482
ENSG00000073849	ST6GAL1	-2.91307	1.26378e-22	chr3	186974887	186975237	-3.47	1.82e-27	Promoter (<=1kb)	TRUE	6.38307		LBP	6.3132
ENSG00000110042	DTX4	-4.84222	3.28231e-66	chr11	59173966	59175120	-1.53	1.03e-07	Promoter (1-2kb)	TRUE	6.37222		AKR1B10	6.27774
ENSG00000169964	TMEM42	-2.36843	4.25982e-05	chr3	44861616	44862345	-3.98	1.93e-22	Promoter (<=1kb)	TRUE	6.34843		AC016396.1	6.25911
ENSG00000131771	PPP1R1B	-3.81482	4.61902e-68	chr17	39628664	39630121	-2.53	7.37e-15	Promoter (<=1kb)	TRUE	6.34482		SLCO2A1	6.24218
ENSG00000129988	LBP	-4.2932	0.000828257	chr20	38343741	38344606	-2.02	1.27e-11	Promoter (1-2kb)	TRUE	6.3132		KLHDC7A	6.228
ENSG00000198074	AKR1B10	-4.48774	9.54794e-07	chr7	134527333	134528177	-1.79	1.57e-08	Promoter (<=1kb)	TRUE	6.27774		FGFR1	6.19051
ENSG00000228527	AC016396.1	-4.82911	9.05163e-12	chr10	58305582	58306271	-1.43	1.58e-05	Promoter (1-2kb)	TRUE	6.25911		ACOT4	6.18232
ENSG00000174640	SLCO2A1	-4.06218	2.23927e-09	chr3	133948955	133949691	-2.18	3.43e-11	Promoter (<=1kb)	TRUE	6.24218		GABBR2	6.1006
ENSG00000179023	KLHDC7A	-2.998	0.00126949	chr1	18480292	18481083	-3.23	2.38e-23	Promoter (<=1kb)	TRUE	6.228		ARMCX5	6.08076
ENSG00000077782	FGFR1	-3.73051	6.98229e-11	chr8	38431035	38431501	-2.46	8.67e-13	Promoter (<=1kb)	TRUE	6.19051		CCDC149	6.07714
ENSG00000177465	ACOT4	-3.40232	9.09389e-11	chr14	73592070	73592490	-2.78	3.66e-08	Promoter (<=1kb)	TRUE	6.18232		FAR2	6.07284
ENSG00000136928	GABBR2	-2.1006	0.00107549	chr9	98610373	98611035	-4	1.35e-12	Promoter (2-3kb)	TRUE	6.1006		SPRED1	6.06595
ENSG00000077782	FGFR1	-3.73051	6.98229e-11	chr8	38429138	38429756	-2.37	4.23e-08	Promoter (<=1kb)	TRUE	6.10051		PLGRKT	6.04916
ENSG00000125962	ARMCX5	-3.48076	4.32541e-10	chrX	102599116	102600132	-2.6	3.17e-15	Promoter (<=1kb)	TRUE	6.08076		ARAP3	6.00394
ENSG00000181982	CCDC149	-4.30714	5.24996e-18	chr4	24912485	24913224	-1.77	2.21e-06	Promoter (<=1kb)	TRUE	6.07714		GLDC	5.99119
ENSG00000064763	FAR2	-4.05284	1.40369e-47	chr12	29149947	29150246	-2.02	1.64e-06	Promoter (<=1kb)	TRUE	6.07284		C4BPB	5.95695
ENSG00000166068	SPRED1	-4.35595	4.11927e-15	chr15	38251294	38252817	-1.71	9.19e-11	Promoter (<=1kb)	TRUE	6.06595		CRAT	5.93962
ENSG00000107020	PLGRKT	-4.69916	1.45882e-07	chr9	5437431	5438430	-1.35	3.05e-06	Promoter (<=1kb)	TRUE	6.04916		CAVIN1	5.91082
ENSG00000120318	ARAP3	-5.12394	1.94798e-51	chr5	141664933	141665439	-0.88	0.00468	Promoter (1-2kb)	TRUE	6.00394		DNAJC18	5.8695
ENSG00000178445	GLDC	-3.86119	2.40672e-30	chr9	6645175	6646543	-2.13	5.21e-12	Promoter (<=1kb)	TRUE	5.99119		LRRC31	5.84532
ENSG00000123843	C4BPB	-4.73695	4.95235e-09	chr1	207088753	207089455	-1.22	6.87e-05	Promoter (<=1kb)	TRUE	5.95695		ABCC3	5.80605
ENSG00000095321	CRAT	-3.80962	4.08801e-39	chr9	129108870	129109822	-2.13	4.38e-12	Promoter (<=1kb)	TRUE	5.93962		IGHE	5.794
ENSG00000177469	CAVIN1	-2.76082	8.28079e-06	chr17	42423211	42423455	-3.15	1.96e-07	Promoter (<=1kb)	TRUE	5.91082		LINC00824	5.77232
ENSG00000150995	ITPR1	-4.45294	6.24295e-13	chr3	4492224	4493630	-1.44	2.57e-07	Promoter (<=1kb)	TRUE	5.89294		NKD1	5.77009
ENSG00000150995	ITPR1	-4.45294	6.24295e-13	chr3	4772074	4772798	-1.43	0.000123	Promoter (1-2kb)	TRUE	5.88294		ZNF215	5.76816
ENSG00000170464	DNAJC18	-3.2895	4.19471e-36	chr5	139445418	139446271	-2.58	4.86e-13	Promoter (<=1kb)	TRUE	5.8695		EXTL1	5.74062
ENSG00000114248	LRRC31	-4.16532	1.27308e-11	chr3	169869902	169870489	-1.68	0.000283	Promoter (<=1kb)	TRUE	5.84532		CDCP1	5.73486
ENSG00000108846	ABCC3	-3.39605	1.12449e-14	chr17	50671125	50671451	-2.41	1.09e-09	Promoter (1-2kb)	TRUE	5.80605		AC005865.2	5.70713
ENSG00000211891	IGHE	-4.554	3.21098e-17	chr14	105602572	105603927	-1.24	0.0435	Promoter (<=1kb)	TRUE	5.794		COL13A1	5.70467
ENSG00000254275	LINC00824	-2.76232	2.98774e-15	chr8	128427927	128428762	-3.01	9.79e-27	Promoter (<=1kb)	TRUE	5.77232		GRB10	5.6993
ENSG00000140807	NKD1	-3.71009	4.33335e-41	chr16	50626592	50627122	-2.06	2.82e-08	Promoter (1-2kb)	TRUE	5.77009		SERHL2	5.68362
ENSG00000149054	ZNF215	-4.01816	3.08667e-06	chr11	6925588	6926699	-1.75	9.69e-07	Promoter (<=1kb)	TRUE	5.76816		KRT81	5.6652
ENSG00000158008	EXTL1	-3.86062	0.000590717	chr1	26017486	26018230	-1.88	1.02e-09	Promoter (1-2kb)	TRUE	5.74062		ELMO1	5.58368
ENSG00000163814	CDCP1	-2.82486	3.56465e-22	chr3	45146156	45146507	-2.91	5.27e-08	Promoter (<=1kb)	TRUE	5.73486		SPACA6	5.50946
ENSG00000250770	AC005865.2	-3.46713	0.000885164	chr12	3365885	3366413	-2.24	4.64e-13	Promoter (<=1kb)	TRUE	5.70713		MALL	5.45999
ENSG00000197467	COL13A1	-4.11467	0.000843296	chr10	69942646	69942895	-1.59	2.65e-06	Promoter (1-2kb)	TRUE	5.70467		ICA1	5.41335
ENSG00000106070	GRB10	-4.0893	7.87554e-53	chr7	50733561	50734131	-1.61	3.51e-09	Promoter (1-2kb)	TRUE	5.6993		SDS	5.40436
ENSG00000108846	ABCC3	-3.39605	1.12449e-14	chr17	50686773	50687573	-2.3	7.49e-05	Promoter (<=1kb)	TRUE	5.69605		NEO1	5.34058
ENSG00000183569	SERHL2	-4.72362	2.91877e-169	chr22	42553511	42554223	-0.96	0.00159	Promoter (<=1kb)	TRUE	5.68362		AKR7A3	5.32488
ENSG00000150995	ITPR1	-4.45294	6.24295e-13	chr3	4711271	4712422	-1.23	5.15e-06	Promoter (<=1kb)	TRUE	5.68294		RPS6KA2	5.3175
ENSG00000205426	KRT81	-3.3052	1.15626e-57	chr12	52287995	52288650	-2.36	1.27e-14	Promoter (2-3kb)	TRUE	5.6652		CPNE2	5.31599
ENSG00000155849	ELMO1	-3.08368	2.32093e-29	chr7	37354357	37355019	-2.5	1.35e-14	Promoter (<=1kb)	TRUE	5.58368		RAP1GAP	5.30767
ENSG00000064763	FAR2	-4.05284	1.40369e-47	chr12	29148201	29149822	-1.52	1.17e-07	Promoter (<=1kb)	TRUE	5.57284		RFX3	5.24406
ENSG00000182310	SPACA6	-2.55946	2.32735e-37	chr19	51702027	51704394	-2.95	1.05e-31	Promoter (<=1kb)	TRUE	5.50946		PTCH1	5.23068
ENSG00000144063	MALL	-4.31999	6.67149e-05	chr2	110115521	110116807	-1.14	0.0001	Promoter (<=1kb)	TRUE	5.45999		KANK1	5.19039
ENSG00000003147	ICA1	-3.44335	1.82855e-29	chr7	8261419	8262631	-1.97	1.35e-10	Promoter (<=1kb)	TRUE	5.41335		C13orf46	5.18122
ENSG00000135094	SDS	-4.30436	4.35894e-17	chr12	113403716	113404669	-1.1	0.00023	Promoter (<=1kb)	TRUE	5.40436		TM4SF1	5.17003
ENSG00000182310	SPACA6	-2.55946	2.32735e-37	chr19	51688147	51689492	-2.84	7.86e-22	Promoter (<=1kb)	TRUE	5.39946		VSIG10L	5.1694
ENSG00000106070	GRB10	-4.0893	7.87554e-53	chr7	50793128	50793780	-1.28	0.000116	Promoter (<=1kb)	TRUE	5.3693		AC104073.1	5.12466
ENSG00000067141	NEO1	-3.29058	2.40334e-22	chr15	73051666	73052744	-2.05	3.81e-11	Promoter (<=1kb)	TRUE	5.34058		EPHB6	5.12329
ENSG00000162482	AKR7A3	-2.42488	1.15066e-14	chr1	19287093	19287535	-2.9	1.07e-11	Promoter (1-2kb)	TRUE	5.32488		ZNF197	5.12287
ENSG00000071242	RPS6KA2	-3.7575	2.12038e-61	chr6	166460866	166461362	-1.56	0.00013	Promoter (1-2kb)	TRUE	5.3175		LINC01270	5.11417
ENSG00000140848	CPNE2	-4.16599	2.94687e-39	chr16	57092533	57093276	-1.15	0.000502	Promoter (<=1kb)	TRUE	5.31599		MAN1C1	5.10682
ENSG00000150995	ITPR1	-4.45294	6.24295e-13	chr3	4722213	4722682	-0.86	0.0243	Promoter (1-2kb)	TRUE	5.31294		CLSTN3	5.10453
ENSG00000076864	RAP1GAP	-3.37767	5.54135e-101	chr1	21655760	21656671	-1.93	1.03e-08	Promoter (2-3kb)	TRUE	5.30767		KRT23	5.06395
ENSG00000080298	RFX3	-3.68406	3.39287e-12	chr9	3525784	3526966	-1.56	3.84e-09	Promoter (<=1kb)	TRUE	5.24406		COL6A1	5.05731
ENSG00000150995	ITPR1	-4.45294	6.24295e-13	chr3	4776773	4777567	-0.78	0.00534	Promoter (1-2kb)	TRUE	5.23294		FRMD1	5.05677
ENSG00000185920	PTCH1	-3.41068	2.82182e-07	chr9	95507173	95507952	-1.82	1.08e-06	Promoter (<=1kb)	TRUE	5.23068		TSNARE1	5.03971
ENSG00000107104	KANK1	-2.49039	1.24191e-24	chr9	706767	707453	-2.7	1.05e-19	Promoter (<=1kb)	TRUE	5.19039		TMEM173	5.00704
ENSG00000283199	C13orf46	-2.91122	0.000574585	chr13	113970308	113971299	-2.27	1.89e-13	Promoter (<=1kb)	TRUE	5.18122		PDE10A	4.98904
ENSG00000169908	TM4SF1	-3.78003	4.84708e-54	chr3	149377485	149378335	-1.39	6.38e-07	Promoter (<=1kb)	TRUE	5.17003		ZNF704	4.97761
ENSG00000186806	VSIG10L	-3.6994	2.58824e-56	chr19	51338883	51340173	-1.47	4.24e-08	Promoter (<=1kb)	TRUE	5.1694		SPRY4	4.96454
ENSG00000229064	AC104073.1	-3.23466	0.000195816	chr7	65249281	65250721	-1.89	1.49e-09	Promoter (1-2kb)	TRUE	5.12466		SLCO3A1	4.95766
ENSG00000106123	EPHB6	-4.04329	1.69621e-05	chr7	142853979	142855039	-1.08	0.00175	Promoter (<=1kb)	TRUE	5.12329		ABCG1	4.95013
ENSG00000186448	ZNF197	-3.52287	2.23675e-12	chr3	44624748	44625340	-1.6	4.2e-06	Promoter (<=1kb)	TRUE	5.12287		MPDZ	4.92784
ENSG00000203999	LINC01270	-3.59417	1.02972e-11	chr20	50295668	50296358	-1.52	1.87e-09	Promoter (2-3kb)	TRUE	5.11417		LINC01446	4.92381
ENSG00000117643	MAN1C1	-2.95682	1.03276e-18	chr1	25688332	25689093	-2.15	1.13e-10	Promoter (1-2kb)	TRUE	5.10682		ATP2C2	4.91578
ENSG00000139182	CLSTN3	-3.01453	1.4621e-42	chr12	7128802	7130871	-2.09	2.48e-11	Promoter (<=1kb)	TRUE	5.10453		SMOC1	4.91453
ENSG00000108244	KRT23	-3.07395	1.03943e-13	chr17	40936595	40937694	-1.99	2.94e-12	Promoter (<=1kb)	TRUE	5.06395		NRG2	4.91413
ENSG00000142156	COL6A1	-3.25731	1.51578e-07	chr21	45984071	45984381	-1.8	2.25e-06	Promoter (2-3kb)	TRUE	5.05731		NINL	4.90311
ENSG00000153303	FRMD1	-2.89677	0.000234727	chr6	168102591	168103168	-2.16	3.19e-07	Promoter (1-2kb)	TRUE	5.05677		TLR5	4.89791
ENSG00000171045	TSNARE1	-3.22971	6.36844e-19	chr8	142402932	142403629	-1.81	1.53e-10	Promoter (<=1kb)	TRUE	5.03971		SLC23A1	4.88182
ENSG00000184584	TMEM173	-2.75704	5.55837e-20	chr5	139481821	139482948	-2.25	1.36e-16	Promoter (<=1kb)	TRUE	5.00704		SHISA9	4.87808
ENSG00000112541	PDE10A	-4.01904	1.96894e-08	chr6	165987087	165988617	-0.97	0.00253	Promoter (<=1kb)	TRUE	4.98904		RHOBTB1	4.84912
ENSG00000164684	ZNF704	-3.45761	6.88001e-139	chr8	80873738	80874987	-1.52	2.74e-07	Promoter (<=1kb)	TRUE	4.97761		ETV4	4.84715
ENSG00000203999	LINC01270	-3.59417	1.02972e-11	chr20	50292486	50292988	-1.38	2.5e-07	Promoter (<=1kb)	TRUE	4.97417		RIN3	4.8188
ENSG00000203999	LINC01270	-3.59417	1.02972e-11	chr20	50312523	50313528	-1.38	3.86e-05	Promoter (1-2kb)	TRUE	4.97417		GAS6	4.79213
ENSG00000187678	SPRY4	-3.74454	6.5217e-27	chr5	142324555	142325478	-1.22	8.98e-05	Promoter (<=1kb)	TRUE	4.96454		PTP4A1	4.78159
ENSG00000176463	SLCO3A1	-3.53766	3.28527e-25	chr15	91852815	91853953	-1.42	1.89e-05	Promoter (<=1kb)	TRUE	4.95766		TCEAL3	4.78026
ENSG00000160179	ABCG1	-3.32013	4.85036e-14	chr21	42199178	42199800	-1.63	2.53e-06	Promoter (<=1kb)	TRUE	4.95013		ERMP1	4.74978
ENSG00000107186	MPDZ	-1.99784	9.70011e-05	chr9	13279451	13280079	-2.93	2.33e-11	Promoter (<=1kb)	TRUE	4.92784		JAK2	4.74797
ENSG00000205628	LINC01446	-2.08381	0.00127778	chr7	53811542	53812354	-2.84	2.37e-23	Promoter (<=1kb)	TRUE	4.92381		PHGDH	4.72418
ENSG00000064270	ATP2C2	-3.01578	2.237e-54	chr16	84407715	84408124	-1.9	4.77e-05	Promoter (<=1kb)	TRUE	4.91578		DLEC1	4.70656
ENSG00000198732	SMOC1	-3.24453	1.42305e-52	chr14	69876393	69877331	-1.67	3.1e-07	Promoter (2-3kb)	TRUE	4.91453		C1orf228	4.70187
ENSG00000158458	NRG2	-2.23413	7.05545e-24	chr5	140041567	140042150	-2.68	1.76e-19	Promoter (<=1kb)	TRUE	4.91413		SLC35C1	4.6676
ENSG00000076864	RAP1GAP	-3.37767	5.54135e-101	chr1	21623618	21624271	-1.53	2.63e-07	Promoter (1-2kb)	TRUE	4.90767		PALMD	4.66305
ENSG00000101004	NINL	-3.30311	2.38322e-07	chr20	25478712	25479476	-1.6	4.32e-05	Promoter (<=1kb)	TRUE	4.90311		BX322639.1	4.65202
ENSG00000187554	TLR5	-3.21791	9.48605e-17	chr1	223140591	223141329	-1.68	2.98e-09	Promoter (1-2kb)	TRUE	4.89791		AC120049.1	4.6246
ENSG00000170482	SLC23A1	-3.38182	4.29122e-06	chr5	139385231	139386337	-1.5	2.02e-07	Promoter (<=1kb)	TRUE	4.88182		TBC1D2B	4.58797
ENSG00000237515	SHISA9	-3.88808	6.15935e-18	chr16	12899073	12900118	-0.99	0.00391	Promoter (1-2kb)	TRUE	4.87808		GSDMC	4.58325
ENSG00000131771	PPP1R1B	-3.81482	4.61902e-68	chr17	39631134	39631852	-1.04	0.00029	Promoter (<=1kb)	TRUE	4.85482		DDIT4	4.58242
ENSG00000072422	RHOBTB1	-2.48912	8.53791e-09	chr10	60942591	60943234	-2.36	0.000658	Promoter (1-2kb)	TRUE	4.84912		AKR1B15	4.578
ENSG00000175832	ETV4	-3.45715	4.49377e-40	chr17	43528473	43528960	-1.39	7.81e-07	Promoter (1-2kb)	TRUE	4.84715		FYN	4.57002
ENSG00000164684	ZNF704	-3.45761	6.88001e-139	chr8	80673333	80674006	-1.38	1.96e-05	Promoter (<=1kb)	TRUE	4.83761		PLEK2	4.56089
ENSG00000100599	RIN3	-1.7288	0.00365952	chr14	92649993	92650486	-3.09	4.17e-24	Promoter (<=1kb)	TRUE	4.8188		KIAA1324	4.5536
ENSG00000164684	ZNF704	-3.45761	6.88001e-139	chr8	80659683	80660344	-1.36	9.24e-06	Promoter (<=1kb)	TRUE	4.81761		FFAR2	4.54755
ENSG00000183087	GAS6	-3.31213	2.77899e-11	chr13	113835568	113835955	-1.48	4.38e-05	Promoter (<=1kb)	TRUE	4.79213		SLC25A38	4.54509
ENSG00000112245	PTP4A1	-1.01159	1.56266e-09	chr6	63519280	63519686	-3.77	2.06e-07	Promoter (2-3kb)	TRUE	4.78159		RPS3AP54	4.54289
ENSG00000196507	TCEAL3	-3.51026	2.99735e-11	chrX	103607749	103608045	-1.27	0.0266	Promoter (<=1kb)	TRUE	4.78026		VTRNA1-3	4.54029
ENSG00000064270	ATP2C2	-3.01578	2.237e-54	chr16	84460920	84461825	-1.76	4.83e-06	Promoter (<=1kb)	TRUE	4.77578		EGR2	4.53866
ENSG00000134107	BHLHE40	-3.72932	1.74118e-59	chr3	4980231	4980529	-1.04	0.000492	Promoter (<=1kb)	TRUE	4.76932		FIBCD1	4.52228
ENSG00000099219	ERMP1	-3.09978	1.13287e-48	chr9	5832267	5833231	-1.65	9.92e-08	Promoter (<=1kb)	TRUE	4.74978		SERINC2	4.50558
ENSG00000096968	JAK2	-2.97797	5.52541e-24	chr9	4984628	4985505	-1.77	1.56e-10	Promoter (<=1kb)	TRUE	4.74797		OSBPL5	4.50209
ENSG00000108846	ABCC3	-3.39605	1.12449e-14	chr17	50660212	50661254	-1.35	1.88e-06	Promoter (<=1kb)	TRUE	4.74605		RBFOX3	4.4886
ENSG00000092621	PHGDH	-3.32418	2.92717e-43	chr1	119711738	119712487	-1.4	1.82e-06	Promoter (<=1kb)	TRUE	4.72418		MAFB	4.47706
ENSG00000064270	ATP2C2	-3.01578	2.237e-54	chr16	84370018	84371005	-1.7	7.34e-09	Promoter (1-2kb)	TRUE	4.71578		LRP5L	4.47516
ENSG00000008226	DLEC1	-2.36656	3.94644e-11	chr3	38040532	38041197	-2.34	3.74e-15	Promoter (1-2kb)	TRUE	4.70656		ZNF503-AS1	4.47289
ENSG00000139182	CLSTN3	-3.01453	1.4621e-42	chr12	7154045	7156026	-1.69	4.19e-10	Promoter (<=1kb)	TRUE	4.70453		TTC34	4.44723
ENSG00000198520	C1orf228	-2.68187	6.29995e-33	chr1	44700721	44701403	-2.02	4.14e-11	Promoter (<=1kb)	TRUE	4.70187		HSPB7	4.4405
ENSG00000182310	SPACA6	-2.55946	2.32735e-37	chr19	51690297	51690752	-2.12	3.04e-09	Promoter (1-2kb)	TRUE	4.67946		GPRC5B	4.43623
ENSG00000181830	SLC35C1	-1.9276	1.87647e-13	chr11	45807821	45808081	-2.74	6.18e-17	Promoter (2-3kb)	TRUE	4.6676		LINC00659	4.43225
ENSG00000099260	PALMD	-3.14305	2.46271e-08	chr1	99645160	99646403	-1.52	6.54e-06	Promoter (<=1kb)	TRUE	4.66305		IL17RD	4.42295
ENSG00000215146	BX322639.1	-2.45202	0.00371356	chr10	42367639	42368202	-2.2	1.5e-12	Promoter (<=1kb)	TRUE	4.65202		LINC02241	4.42079
ENSG00000175832	ETV4	-3.45715	4.49377e-40	chr17	43545519	43546776	-1.19	2.89e-05	Promoter (<=1kb)	TRUE	4.64715		TMEM44	4.38403
ENSG00000158458	NRG2	-2.23413	7.05545e-24	chr5	140039727	140040166	-2.4	7.92e-12	Promoter (2-3kb)	TRUE	4.63413		CDC42EP4	4.34853
ENSG00000267414	AC120049.1	-3.0346	0.00179073	chr18	44679036	44679502	-1.59	4.56e-05	Promoter (<=1kb)	TRUE	4.6246		LY6E-DT	4.33771
ENSG00000167202	TBC1D2B	-1.11797	3.27656e-07	chr15	78003564	78004352	-3.47	6.35e-24	Promoter (<=1kb)	TRUE	4.58797		ETFB	4.32739
ENSG00000147697	GSDMC	-2.91325	2.79172e-10	chr8	129752168	129754130	-1.67	3.95e-09	Promoter (<=1kb)	TRUE	4.58325		PTAFR	4.32054
ENSG00000168209	DDIT4	-3.61242	1.35449e-107	chr10	72272866	72274385	-0.97	0.000483	Promoter (<=1kb)	TRUE	4.58242		AUTS2	4.31522
ENSG00000227471	AKR1B15	-2.988	3.08078e-10	chr7	134563053	134564171	-1.59	4.69e-07	Promoter (<=1kb)	TRUE	4.578		GPRC5C	4.31338
ENSG00000010810	FYN	-2.63002	2.60764e-13	chr6	111707019	111707620	-1.94	0.000148	Promoter (<=1kb)	TRUE	4.57002		RN7SL472P	4.31052
ENSG00000100558	PLEK2	-3.14089	2.71267e-12	chr14	67413582	67414648	-1.42	1.04e-07	Promoter (1-2kb)	TRUE	4.56089		DCAF4L2	4.2999
ENSG00000116299	KIAA1324	-2.5636	7.88102e-14	chr1	109184763	109185726	-1.99	2.36e-11	Promoter (<=1kb)	TRUE	4.5536		LCN2	4.2857
ENSG00000126262	FFAR2	-1.31755	0.000195816	chr19	35442080	35442502	-3.23	6.5e-09	Promoter (1-2kb)	TRUE	4.54755		MXRA5	4.27173
ENSG00000144659	SLC25A38	-3.54509	1.5e-13	chr3	39383452	39384608	-1	0.000371	Promoter (<=1kb)	TRUE	4.54509		TRPV6	4.27067
ENSG00000229057	RPS3AP54	-1.93289	0.000834351	chr9	6664631	6665073	-2.61	4.54e-10	Promoter (2-3kb)	TRUE	4.54289		SYNE3	4.25438
ENSG00000202515	VTRNA1-3	-3.85029	0.00069953	chr5	140725800	140726539	-0.69	0.0159	Promoter (<=1kb)	TRUE	4.54029		SMARCD3	4.24895
ENSG00000122877	EGR2	-3.47866	0.0151198	chr10	62817891	62818182	-1.06	0.000224	Promoter (<=1kb)	TRUE	4.53866		PADI2	4.23908
ENSG00000130720	FIBCD1	-3.32228	5.74003e-05	chr9	130936281	130936910	-1.2	0.000211	Promoter (<=1kb)	TRUE	4.52228		ARSD	4.22904
ENSG00000168528	SERINC2	-1.73558	5.39978e-38	chr1	31407139	31407359	-2.77	2.47e-09	Promoter (2-3kb)	TRUE	4.50558		SPRY4-AS1	4.22724
ENSG00000021762	OSBPL5	-2.36209	3.47013e-61	chr11	3124372	3124744	-2.14	9.4e-12	Promoter (1-2kb)	TRUE	4.50209		AL035420.1	4.21329
ENSG00000167281	RBFOX3	-1.2686	9.58203e-06	chr17	79305683	79307200	-3.22	1.21e-21	Promoter (<=1kb)	TRUE	4.4886		OTX1	4.21015
ENSG00000204103	MAFB	-2.63706	1.69484e-05	chr20	40688978	40690252	-1.84	5.7e-09	Promoter (<=1kb)	TRUE	4.47706		C1orf127	4.20088
ENSG00000100068	LRP5L	-2.13516	2.08548e-28	chr22	25364256	25365108	-2.34	8.96e-14	Promoter (1-2kb)	TRUE	4.47516		LINC02568	4.20058
ENSG00000226051	ZNF503-AS1	-1.61289	0.0243085	chr10	75283340	75284282	-2.86	1.23e-17	Promoter (<=1kb)	TRUE	4.47289		PLEKHA7	4.19308
ENSG00000215912	TTC34	-2.86723	4.4502e-07	chr1	2801501	2802195	-1.58	2.45e-06	Promoter (<=1kb)	TRUE	4.44723		ABR	4.18732
ENSG00000173641	HSPB7	-2.4005	1.79445e-07	chr1	16017727	16018927	-2.04	7.75e-10	Promoter (<=1kb)	TRUE	4.4405		CEACAM6	4.18611
ENSG00000107104	KANK1	-2.49039	1.24191e-24	chr9	504258	504775	-1.95	8.04e-08	Promoter (<=1kb)	TRUE	4.44039		KDM4C	4.18509
ENSG00000167191	GPRC5B	-2.00623	0.000354717	chr16	19874771	19875755	-2.43	1.76e-09	Promoter (1-2kb)	TRUE	4.43623		CEACAM1	4.18401
ENSG00000228705	LINC00659	-1.14225	0.000494995	chr20	62773007	62773674	-3.29	1.12e-24	Promoter (1-2kb)	TRUE	4.43225		AC009407.1	4.18125
ENSG00000144730	IL17RD	-3.17295	1.64574e-07	chr3	57165009	57165512	-1.25	6.31e-05	Promoter (<=1kb)	TRUE	4.42295		FARP1	4.18008
ENSG00000251629	LINC02241	-2.84079	1.89661e-05	chr5	20616079	20617173	-1.58	2.87e-05	Promoter (<=1kb)	TRUE	4.42079		MAPT	4.17687
ENSG00000155849	ELMO1	-3.08368	2.32093e-29	chr7	37448503	37449412	-1.32	3.08e-05	Promoter (<=1kb)	TRUE	4.40368		ADORA1	4.15704
ENSG00000145014	TMEM44	-2.66403	4.21742e-22	chr3	194633156	194633968	-1.72	1.31e-09	Promoter (<=1kb)	TRUE	4.38403		RERG	4.15285
ENSG00000179604	CDC42EP4	-1.78853	5.52142e-10	chr17	73308304	73308679	-2.56	1.97e-13	Promoter (1-2kb)	TRUE	4.34853		IL20	4.15103
ENSG00000107104	KANK1	-2.49039	1.24191e-24	chr9	469611	470703	-1.85	1.21e-07	Promoter (<=1kb)	TRUE	4.34039		SORCS2	4.14771
ENSG00000247317	LY6E-DT	-2.41771	2.46389e-10	chr8	143013133	143013725	-1.92	4.65e-12	Promoter (<=1kb)	TRUE	4.33771		HBEGF	4.14294
ENSG00000105379	ETFB	-2.11739	2.97623e-19	chr19	51350401	51351201	-2.21	0.000192	Promoter (1-2kb)	TRUE	4.32739		CARD11	4.13264
ENSG00000169403	PTAFR	-1.88054	1.35434e-25	chr1	28190467	28191126	-2.44	3.94e-11	Promoter (2-3kb)	TRUE	4.32054		COL16A1	4.11443
ENSG00000158321	AUTS2	-2.89522	1.67187e-88	chr7	70693697	70694788	-1.42	7.56e-06	Promoter (<=1kb)	TRUE	4.31522		ADARB2-AS1	4.11138
ENSG00000170412	GPRC5C	-2.40338	7.78375e-11	chr17	74430638	74431045	-1.91	6.04e-08	Promoter (<=1kb)	TRUE	4.31338		TTC39B	4.10346
ENSG00000240457	RN7SL472P	-2.88052	1.07597e-05	chr14	102078503	102079623	-1.43	8.03e-05	Promoter (1-2kb)	TRUE	4.31052		SNAPC3	4.09291
ENSG00000176566	DCAF4L2	-2.7099	1.10962e-32	chr8	87872823	87874383	-1.59	1.16e-10	Promoter (<=1kb)	TRUE	4.2999		EDDM3A	4.0899
ENSG00000148346	LCN2	-2.9257	3.17203e-08	chr9	128148929	128149616	-1.36	3.2e-07	Promoter (<=1kb)	TRUE	4.2857		TRIO	4.08803
ENSG00000101825	MXRA5	-2.41173	0.000896286	chrX	3347879	3348521	-1.86	2.33e-07	Promoter (1-2kb)	TRUE	4.27173		EPHB4	4.07637
ENSG00000165125	TRPV6	-2.56067	5.08591e-54	chr7	142882136	142882579	-1.71	4.9e-08	Promoter (2-3kb)	TRUE	4.27067		HMGB1P41	4.06533
ENSG00000176438	SYNE3	-2.63438	1.12557e-08	chr14	95475765	95476323	-1.62	1.21e-06	Promoter (<=1kb)	TRUE	4.25438		FCHSD1	4.05058
ENSG00000082014	SMARCD3	-2.47895	1.255e-15	chr7	151271571	151272430	-1.77	1.92e-10	Promoter (2-3kb)	TRUE	4.24895		SLC22A4	4.04289
ENSG00000117115	PADI2	-3.07908	5.34098e-104	chr1	17119284	17119747	-1.16	9.25e-05	Promoter (<=1kb)	TRUE	4.23908		UNC5CL	4.04215
ENSG00000006756	ARSD	-2.50904	1.48195e-29	chrX	2928910	2929542	-1.72	6.23e-08	Promoter (<=1kb)	TRUE	4.22904		MNX1	4.03767
ENSG00000231185	SPRY4-AS1	-3.23724	7.42727e-07	chr5	142403378	142404276	-0.99	0.000166	Promoter (<=1kb)	TRUE	4.22724		CLEC2D	4.02434
ENSG00000100558	PLEK2	-3.14089	2.71267e-12	chr14	67412013	67412496	-1.08	0.000113	Promoter (<=1kb)	TRUE	4.22089		ATP7B	4.00836
ENSG00000234139	AL035420.1	-1.71329	0.000204728	chr20	36070074	36070790	-2.5	5.9e-13	Promoter (1-2kb)	TRUE	4.21329		PHLDA2	4.00556
ENSG00000115507	OTX1	-2.53015	4.57065e-05	chr2	63050209	63051076	-1.68	4.17e-09	Promoter (<=1kb)	TRUE	4.21015		PRKCH	4.00193
ENSG00000175262	C1orf127	-2.70088	4.35363e-13	chr1	10960370	10961275	-1.5	2.55e-05	Promoter (2-3kb)	TRUE	4.20088		KDM3B	4.00016
ENSG00000259459	LINC02568	-2.85058	2.14901e-26	chr15	63389849	63390209	-1.35	2.83e-05	Promoter (<=1kb)	TRUE	4.20058		UNC5A	3.99601
ENSG00000166689	PLEKHA7	-1.16308	2.08267e-12	chr11	16814995	16815662	-3.03	1.24e-23	Promoter (<=1kb)	TRUE	4.19308		ANKRD6	3.99566
ENSG00000122877	EGR2	-3.47866	0.0151198	chr10	62816190	62817149	-0.71	0.0143	Promoter (<=1kb)	TRUE	4.18866		RNF152	3.99156
ENSG00000159842	ABR	-2.89732	4.62628e-28	chr17	1047008	1047937	-1.29	0.000292	Promoter (2-3kb)	TRUE	4.18732		2009-09-01	3.95441
ENSG00000086548	CEACAM6	-3.49611	1.76866e-08	chr19	41753330	41755499	-0.69	0.0159	Promoter (<=1kb)	TRUE	4.18611		RIC1	3.94167
ENSG00000107077	KDM4C	-2.52509	1.60594e-21	chr9	6757018	6758561	-1.66	1.58e-10	Promoter (<=1kb)	TRUE	4.18509		JPH2	3.92472
ENSG00000163814	CDCP1	-2.82486	3.56465e-22	chr3	45137969	45139755	-1.36	1.32e-07	Promoter (<=1kb)	TRUE	4.18486		LINC00598	3.89112
ENSG00000079385	CEACAM1	-1.91401	4.05359e-05	chr19	42515298	42515561	-2.27	5.39e-07	Promoter (2-3kb)	TRUE	4.18401		EIF4EBP3	3.89054
ENSG00000261829	AC009407.1	-1.48125	0.0103916	chr2	231050383	231050844	-2.7	2.54e-14	Promoter (1-2kb)	TRUE	4.18125		TCF12	3.88594
ENSG00000152767	FARP1	-2.20008	1.22845e-16	chr13	98142837	98143485	-1.98	8.79e-11	Promoter (<=1kb)	TRUE	4.18008		LONRF1	3.88357
ENSG00000186868	MAPT	-2.65687	0.00102812	chr17	45973188	45974160	-1.52	2.18e-06	Promoter (<=1kb)	TRUE	4.17687		EGR1	3.88333
ENSG00000117643	MAN1C1	-2.95682	1.03276e-18	chr1	25775269	25775832	-1.22	0.000195	Promoter (1-2kb)	TRUE	4.17682		CELF3	3.88187
ENSG00000170464	DNAJC18	-3.2895	4.19471e-36	chr5	139438909	139439821	-0.88	0.000833	Promoter (<=1kb)	TRUE	4.1695		AK3	3.88151
ENSG00000158321	AUTS2	-2.89522	1.67187e-88	chr7	70728743	70730110	-1.27	9.17e-06	Promoter (<=1kb)	TRUE	4.16522		GIPR	3.877
ENSG00000163485	ADORA1	-2.70704	8.37252e-22	chr1	203129677	203130607	-1.45	5.62e-07	Promoter (<=1kb)	TRUE	4.15704		TMPRSS4	3.8739
ENSG00000134533	RERG	-2.48285	2.33476e-07	chr12	15348194	15348912	-1.67	5.53e-07	Promoter (<=1kb)	TRUE	4.15285		RRAGD	3.86462
ENSG00000162891	IL20	-3.18103	9.77829e-06	chr1	206863215	206863629	-0.97	0.000214	Promoter (1-2kb)	TRUE	4.15103		UNC5B	3.84864
ENSG00000184985	SORCS2	-3.31771	0.000104484	chr4	7381255	7382003	-0.83	0.0216	Promoter (<=1kb)	TRUE	4.14771		AC025259.3	3.83029
ENSG00000113070	HBEGF	-2.26294	7.18131e-07	chr5	140340738	140341892	-1.88	1.23e-11	Promoter (1-2kb)	TRUE	4.14294		AL391361.2	3.82473
ENSG00000175262	C1orf127	-2.70088	4.35363e-13	chr1	10979404	10980517	-1.44	1.38e-06	Promoter (1-2kb)	TRUE	4.14088		PTGS1	3.78059
ENSG00000134533	RERG	-2.48285	2.33476e-07	chr12	15216075	15216552	-1.65	5.87e-06	Promoter (1-2kb)	TRUE	4.13285		LAMA3	3.7713
ENSG00000198286	CARD11	-3.40264	0.00136929	chr7	2921112	2922004	-0.73	0.0407	Promoter (1-2kb)	TRUE	4.13264		TGFB3	3.75349
ENSG00000171310	CHST11	-2.98048	4.09012e-17	chr12	104456646	104457734	-1.15	0.000465	Promoter (<=1kb)	TRUE	4.13048		SUSD4	3.75248
ENSG00000250770	AC005865.2	-3.46713	0.000885164	chr12	3299863	3300877	-0.65	0.031	Promoter (<=1kb)	TRUE	4.11713		CTSH	3.75174
ENSG00000084636	COL16A1	-1.96443	1.12018e-05	chr1	31669701	31670508	-2.15	2.98e-11	Promoter (<=1kb)	TRUE	4.11443		GLYATL2	3.75029
ENSG00000205696	ADARB2-AS1	-3.24138	1.40308e-06	chr10	1526301	1527080	-0.87	0.000799	Promoter (<=1kb)	TRUE	4.11138		CD24	3.74225
ENSG00000162482	AKR7A3	-2.42488	1.15066e-14	chr1	19288738	19289128	-1.68	2.72e-06	Promoter (<=1kb)	TRUE	4.10488		TTLL3	3.73865
ENSG00000155158	TTC39B	-2.53346	1.79438e-16	chr9	15306021	15307669	-1.57	1.41e-09	Promoter (<=1kb)	TRUE	4.10346		AC004233.2	3.70885
ENSG00000073849	ST6GAL1	-2.91307	1.26378e-22	chr3	186931241	186932136	-1.19	0.00129	Promoter (<=1kb)	TRUE	4.10307		BDH1	3.70168
ENSG00000164975	SNAPC3	-2.42291	5.76559e-26	chr9	15422321	15423306	-1.67	6.36e-09	Promoter (<=1kb)	TRUE	4.09291		SHISA5	3.70065
ENSG00000181562	EDDM3A	-3.3899	1.28531e-12	chr14	20743503	20744019	-0.7	0.0353	Promoter (1-2kb)	TRUE	4.0899		RNASE1	3.69808
ENSG00000038382	TRIO	-2.53803	1.35582e-09	chr5	14144770	14145416	-1.55	4.78e-06	Promoter (<=1kb)	TRUE	4.08803		CCDC162P	3.69408
ENSG00000196411	EPHB4	-1.81637	6.60276e-26	chr7	100813853	100814411	-2.26	3.21e-13	Promoter (<=1kb)	TRUE	4.07637		DUSP4	3.68304
ENSG00000253516	HMGB1P41	-3.01533	1.74186e-15	chr8	80809933	80810928	-1.05	0.000393	Promoter (1-2kb)	TRUE	4.06533		ITGA9	3.67173
ENSG00000197948	FCHSD1	-2.65058	3.97731e-35	chr5	141645979	141646475	-1.4	4.67e-07	Promoter (<=1kb)	TRUE	4.05058		SLC43A2	3.66956
ENSG00000197208	SLC22A4	-1.47289	0.0197579	chr5	132321103	132322285	-2.57	1.08e-06	Promoter (<=1kb)	TRUE	4.04289		PTPRH	3.65571
ENSG00000124602	UNC5CL	-3.12215	3.96647e-08	chr6	41039052	41039761	-0.92	0.00373	Promoter (<=1kb)	TRUE	4.04215		SYTL2	3.65343
ENSG00000130675	MNX1	-2.34767	3.22771e-23	chr7	157007390	157008231	-1.69	1.34e-06	Promoter (<=1kb)	TRUE	4.03767		DUSP6	3.65128
ENSG00000130720	FIBCD1	-3.32228	5.74003e-05	chr9	130927511	130928830	-0.71	0.0178	Promoter (1-2kb)	TRUE	4.03228		PLEKHA5	3.64417
ENSG00000215912	TTC34	-2.86723	4.4502e-07	chr1	2787218	2787807	-1.16	0.0357	Promoter (1-2kb)	TRUE	4.02723		TSPAN9	3.63885
ENSG00000069493	CLEC2D	-2.90434	7.17703e-25	chr12	9673218	9674129	-1.12	0.000633	Promoter (<=1kb)	TRUE	4.02434		PFKFB1	3.63014
ENSG00000116299	KIAA1324	-2.5636	7.88102e-14	chr1	109162032	109162819	-1.45	1.65e-06	Promoter (<=1kb)	TRUE	4.0136		TTC7B	3.62934
ENSG00000123191	ATP7B	-2.36836	6.04128e-07	chr13	51958211	51958559	-1.64	0.000101	Promoter (1-2kb)	TRUE	4.00836		TMEM255B	3.62639
ENSG00000181649	PHLDA2	-2.78556	1.0373e-40	chr11	2929139	2929825	-1.22	8.99e-06	Promoter (<=1kb)	TRUE	4.00556		PHLDA1	3.62577
ENSG00000027075	PRKCH	-1.86193	2.3367e-18	chr14	61489625	61490404	-2.14	4.67e-13	Promoter (1-2kb)	TRUE	4.00193		PLIN1	3.61175
ENSG00000120733	KDM3B	-1.04016	8.74504e-10	chr5	138388683	138389129	-2.96	4.72e-08	Promoter (2-3kb)	TRUE	4.00016		ST3GAL5	3.59937
ENSG00000113763	UNC5A	-2.32601	0.00130844	chr5	176862303	176862940	-1.67	0.0179	Promoter (<=1kb)	TRUE	3.99601		DENND1C	3.59074
ENSG00000135299	ANKRD6	-2.05566	1.61257e-11	chr6	89509026	89510123	-1.94	3.92e-06	Promoter (<=1kb)	TRUE	3.99566		GABRA3	3.5906
ENSG00000170412	GPRC5C	-2.40338	7.78375e-11	chr17	74431853	74432270	-1.59	5.23e-07	Promoter (<=1kb)	TRUE	3.99338		LINC01252	3.58836
ENSG00000176641	RNF152	-1.85156	2.15256e-12	chr18	61887453	61888939	-2.14	1.45e-15	Promoter (<=1kb)	TRUE	3.99156		PTER	3.58585
ENSG00000073849	ST6GAL1	-2.91307	1.26378e-22	chr3	186976926	186977754	-1.07	0.000227	Promoter (1-2kb)	TRUE	3.98307		ZBTB4	3.57103
ENSG00000184640	2009-09-01	-1.01441	9.82082e-12	chr17	77451772	77452536	-2.94	1.66e-08	Promoter (<=1kb)	TRUE	3.95441		ZNF853	3.56119
ENSG00000101825	MXRA5	-2.41173	0.000896286	chrX	3345290	3346002	-1.54	2.17e-06	Promoter (<=1kb)	TRUE	3.95173		SLC25A4	3.55939
ENSG00000144730	IL17RD	-3.17295	1.64574e-07	chr3	57170072	57171254	-0.77	0.045	Promoter (<=1kb)	TRUE	3.94295		ZNF736	3.55337
ENSG00000107036	RIC1	-2.32167	8.00054e-19	chr9	5628517	5629635	-1.62	1.32e-08	Promoter (<=1kb)	TRUE	3.94167		CPXM1	3.54777
ENSG00000149596	JPH2	-2.79472	1.46738e-33	chr20	44187212	44187957	-1.13	0.000139	Promoter (<=1kb)	TRUE	3.92472		LINC02412	3.53901
ENSG00000170412	GPRC5C	-2.40338	7.78375e-11	chr17	74427201	74427709	-1.52	2.43e-07	Promoter (2-3kb)	TRUE	3.92338		TTC36	3.53315
ENSG00000163485	ADORA1	-2.70704	8.37252e-22	chr1	203153886	203154781	-1.21	1.85e-05	Promoter (1-2kb)	TRUE	3.91704		OLAH	3.53193
ENSG00000084636	COL16A1	-1.96443	1.12018e-05	chr1	31700936	31701949	-1.94	5.04e-09	Promoter (2-3kb)	TRUE	3.90443		HMGCL	3.53082
ENSG00000215483	LINC00598	-2.04112	0.00147294	chr13	40271770	40272646	-1.85	0.0136	Promoter (<=1kb)	TRUE	3.89112		AL513318.2	3.50021
ENSG00000243056	EIF4EBP3	-2.81054	0.000806634	chr5	140546904	140548022	-1.08	0.000422	Promoter (<=1kb)	TRUE	3.89054		ARHGEF10L	3.49995
ENSG00000140262	TCF12	-2.22594	3.90578e-08	chr15	56918221	56919457	-1.66	7.45e-09	Promoter (<=1kb)	TRUE	3.88594		ZBTB47	3.49801
ENSG00000154359	LONRF1	-1.50357	5.2125e-06	chr8	12726351	12726787	-2.38	1.79e-09	Promoter (<=1kb)	TRUE	3.88357		RAP1GAP2	3.47514
ENSG00000120738	EGR1	-2.57333	2.46383e-95	chr5	138464073	138465884	-1.31	2.25e-06	Promoter (<=1kb)	TRUE	3.88333		DAPK2	3.46704
ENSG00000159409	CELF3	-2.95187	9.9168e-17	chr1	151717630	151718632	-0.93	0.00345	Promoter (<=1kb)	TRUE	3.88187		PTPRU	3.45786
ENSG00000147853	AK3	-1.97151	1.59514e-28	chr9	4740912	4741422	-1.91	7.17e-07	Promoter (<=1kb)	TRUE	3.88151		ITGA2	3.45731
ENSG00000010310	GIPR	-3.217	8.64225e-32	chr19	45669087	45669532	-0.66	0.0464	Promoter (<=1kb)	TRUE	3.877		SLC16A3	3.45384
ENSG00000137648	TMPRSS4	-2.7839	9.82374e-07	chr11	118106716	118107106	-1.09	0.000451	Promoter (1-2kb)	TRUE	3.8739		NSG2	3.4396
ENSG00000117643	MAN1C1	-2.95682	1.03276e-18	chr1	25773381	25774257	-0.91	0.00456	Promoter (1-2kb)	TRUE	3.86682		DHCR24	3.43674
ENSG00000025039	RRAGD	-2.26462	0.000115025	chr6	89411834	89412642	-1.6	1.55e-05	Promoter (<=1kb)	TRUE	3.86462		CTNNB1	3.43372
ENSG00000107731	UNC5B	-2.94864	3.15197e-15	chr10	71212255	71212716	-0.9	0.0046	Promoter (<=1kb)	TRUE	3.84864		TMEM104	3.43228
ENSG00000259884	AC025259.3	-1.13029	0.000133562	chr12	52058689	52060789	-2.7	3.04e-08	Promoter (<=1kb)	TRUE	3.83029		SRCIN1	3.42915
ENSG00000224371	AL391361.2	-2.64473	0.000115012	chr6	160917703	160918910	-1.18	4.09e-05	Promoter (<=1kb)	TRUE	3.82473		MCC	3.4229
ENSG00000038382	TRIO	-2.53803	1.35582e-09	chr5	14489648	14490044	-1.27	0.0013	Promoter (1-2kb)	TRUE	3.80803		MAN2B2	3.39729
ENSG00000064270	ATP2C2	-3.01578	2.237e-54	chr16	84367762	84368601	-0.77	0.0205	Promoter (<=1kb)	TRUE	3.78578		PLCXD1	3.39045
ENSG00000147697	GSDMC	-2.91325	2.79172e-10	chr8	129786490	129787418	-0.87	0.00191	Promoter (<=1kb)	TRUE	3.78325		RASA3	3.38671
ENSG00000095303	PTGS1	-2.43059	1.41665e-12	chr9	122375038	122376969	-1.35	9.16e-06	Promoter (<=1kb)	TRUE	3.78059		PHLDB2	3.3736
ENSG00000073849	ST6GAL1	-2.91307	1.26378e-22	chr3	186998815	187000201	-0.86	0.00784	Promoter (2-3kb)	TRUE	3.77307		MYEF2	3.37127
ENSG00000053747	LAMA3	-2.3013	1.00983e-06	chr18	23943979	23944770	-1.47	5.8e-07	Promoter (1-2kb)	TRUE	3.7713		CACNA1D	3.35807
ENSG00000119699	TGFB3	-1.35349	2.19001e-11	chr14	75960082	75960884	-2.4	2.67e-12	Promoter (<=1kb)	TRUE	3.75349		TNIK	3.3503
ENSG00000143502	SUSD4	-2.58248	0.00238601	chr1	223363981	223364533	-1.17	0.00414	Promoter (<=1kb)	TRUE	3.75248		CX3CL1	3.35022
ENSG00000103811	CTSH	-1.90174	1.43692e-12	chr15	78951929	78952167	-1.85	0.00505	Promoter (2-3kb)	TRUE	3.75174		PLAU	3.35017
ENSG00000156689	GLYATL2	-2.87029	0.000452522	chr11	58845205	58845874	-0.88	0.0329	Promoter (<=1kb)	TRUE	3.75029		EPB41L1	3.32896
ENSG00000010810	FYN	-2.63002	2.60764e-13	chr6	111707776	111708074	-1.12	0.00699	Promoter (<=1kb)	TRUE	3.75002		ALPK1	3.3156
ENSG00000272398	CD24	-2.25225	1.70161e-62	chr6	106974175	106975443	-1.49	5.06e-08	Promoter (<=1kb)	TRUE	3.74225		ASAP3	3.31378
ENSG00000214021	TTLL3	-2.72865	3.87814e-25	chr3	9820748	9821292	-1.01	0.0245	Promoter (<=1kb)	TRUE	3.73865		TBC1D16	3.31008
ENSG00000105379	ETFB	-2.11739	2.97623e-19	chr19	51366343	51368100	-1.61	2.27e-09	Promoter (<=1kb)	TRUE	3.72739		GOLGA8B	3.28252
ENSG00000072422	RHOBTB1	-2.48912	8.53791e-09	chr10	60943634	60944564	-1.23	3.74e-05	Promoter (<=1kb)	TRUE	3.71912		FUCA1	3.2525
ENSG00000224371	AL391361.2	-2.64473	0.000115012	chr6	160919201	160920373	-1.07	0.000533	Promoter (<=1kb)	TRUE	3.71473		DEPTOR	3.25078
ENSG00000270168	AC004233.2	-2.66885	2.19457e-24	chr16	2985626	2986373	-1.04	0.00524	Promoter (1-2kb)	TRUE	3.70885		EPHX1	3.24443
ENSG00000161267	BDH1	-1.66168	0.00271082	chr3	197533724	197534679	-2.04	9.44e-13	Promoter (<=1kb)	TRUE	3.70168		CDC37L1	3.23641
ENSG00000164054	SHISA5	-1.42065	1.39609e-17	chr3	48502380	48503103	-2.28	3.9e-14	Promoter (<=1kb)	TRUE	3.70065		PYCARD-AS1	3.22923
ENSG00000072422	RHOBTB1	-2.48912	8.53791e-09	chr10	61001048	61001698	-1.21	0.000226	Promoter (<=1kb)	TRUE	3.69912		GPR160	3.22764
ENSG00000129538	RNASE1	-1.89808	3.77015e-06	chr14	20799690	20800785	-1.8	3.33e-09	Promoter (1-2kb)	TRUE	3.69808		TNFAIP8	3.22504
ENSG00000203799	CCDC162P	-1.68408	0.000519167	chr6	109343810	109344645	-2.01	2.01e-09	Promoter (<=1kb)	TRUE	3.69408		SH3PXD2B	3.20537
ENSG00000120875	DUSP4	-2.93304	3.59738e-74	chr8	29350327	29351189	-0.75	0.00785	Promoter (<=1kb)	TRUE	3.68304		AL096869.2	3.20425
ENSG00000144668	ITGA9	-2.71173	0.000486971	chr3	37451631	37452158	-0.96	0.0204	Promoter (<=1kb)	TRUE	3.67173		P4HA1	3.19555
ENSG00000167703	SLC43A2	-1.15956	1.74775e-09	chr17	1581121	1581930	-2.51	1.46e-13	Promoter (1-2kb)	TRUE	3.66956		VSTM2L	3.19225
ENSG00000080031	PTPRH	-1.15571	0.000507175	chr19	55212420	55212750	-2.5	8.15e-14	Promoter (2-3kb)	TRUE	3.65571		ZNF160	3.18495
ENSG00000137501	SYTL2	-2.32343	9.7676e-12	chr11	85723027	85723361	-1.33	0.000606	Promoter (1-2kb)	TRUE	3.65343		NUPR1	3.16765
ENSG00000139318	DUSP6	-1.56128	0.000298936	chr12	89351907	89353299	-2.09	4.54e-13	Promoter (<=1kb)	TRUE	3.65128		RARA	3.15397
ENSG00000052126	PLEKHA5	-2.37417	7.26768e-22	chr12	19129667	19130425	-1.27	0.00032	Promoter (<=1kb)	TRUE	3.64417		CISH	3.13728
ENSG00000011105	TSPAN9	-2.26885	1.0062e-18	chr12	3214448	3215559	-1.37	2.45e-06	Promoter (<=1kb)	TRUE	3.63885		NDUFA4L2	3.1286
ENSG00000158571	PFKFB1	-2.37014	2.51062e-08	chrX	54994355	54994997	-1.26	8.65e-05	Promoter (<=1kb)	TRUE	3.63014		SESN2	3.11932
ENSG00000165914	TTC7B	-1.59934	1.84409e-07	chr14	90645869	90646455	-2.03	3.07e-12	Promoter (<=1kb)	TRUE	3.62934		MGST1	3.11324
ENSG00000184497	TMEM255B	-2.13639	0.000723379	chr13	113758947	113759434	-1.49	8.24e-06	Promoter (<=1kb)	TRUE	3.62639		KIF21B	3.11058
ENSG00000139289	PHLDA1	-2.60577	3.43492e-09	chr12	76030895	76032095	-1.02	8.86e-05	Promoter (<=1kb)	TRUE	3.62577		PADI1	3.10579
ENSG00000135299	ANKRD6	-2.05566	1.61257e-11	chr6	89432826	89433434	-1.56	2.52e-08	Promoter (<=1kb)	TRUE	3.61566		SLC27A1	3.10149
ENSG00000166819	PLIN1	-2.28175	1.9062e-17	chr15	89680251	89681313	-1.33	0.000192	Promoter (<=1kb)	TRUE	3.61175		SLC16A9	3.08549
ENSG00000197948	FCHSD1	-2.65058	3.97731e-35	chr5	141651006	141651888	-0.95	0.000612	Promoter (<=1kb)	TRUE	3.60058		ITGA1	3.0722
ENSG00000115525	ST3GAL5	-1.82937	0.00324932	chr2	85899908	85900171	-1.77	0.00105	Promoter (2-3kb)	TRUE	3.59937		PHYKPL	3.07217
ENSG00000205744	DENND1C	-1.49074	1.8381e-05	chr19	6472838	6473244	-2.1	2.81e-08	Promoter (2-3kb)	TRUE	3.59074		DGAT2	3.06115
ENSG00000011677	GABRA3	-2.1906	2.84089e-06	chrX	152451464	152451940	-1.4	0.000891	Promoter (<=1kb)	TRUE	3.5906		AC011632.1	3.061
ENSG00000247157	LINC01252	-2.63836	0.000494384	chr12	11554070	11554548	-0.95	0.0366	Promoter (1-2kb)	TRUE	3.58836		PNPLA3	3.04961
ENSG00000165983	PTER	-2.90585	6.11159e-06	chr10	16436409	16437312	-0.68	0.0178	Promoter (<=1kb)	TRUE	3.58585		RASGRP2	3.04018
ENSG00000174282	ZBTB4	-1.46103	2.55226e-24	chr17	7477425	7478214	-2.11	1.95e-10	Promoter (1-2kb)	TRUE	3.57103		RNF39	3.02124
ENSG00000236609	ZNF853	-1.85119	0.0405207	chr7	6613694	6614119	-1.71	1.03e-06	Promoter (1-2kb)	TRUE	3.56119		PC	3.01952
ENSG00000151729	SLC25A4	-2.23939	3.49777e-07	chr4	185142864	185143710	-1.32	2.54e-05	Promoter (<=1kb)	TRUE	3.55939		STXBP1	3.01374
ENSG00000119699	TGFB3	-1.35349	2.19001e-11	chr14	75978144	75978917	-2.2	1.4e-12	Promoter (2-3kb)	TRUE	3.55349		P2RY6	3.00858
ENSG00000234444	ZNF736	-1.52337	0.00044189	chr7	64313658	64314417	-2.03	1.47e-12	Promoter (<=1kb)	TRUE	3.55337		WNT5A	3.00814
ENSG00000027075	PRKCH	-1.86193	2.3367e-18	chr14	61482593	61483071	-1.69	3.01e-07	Promoter (2-3kb)	TRUE	3.55193		S100A6	3.00767
ENSG00000088882	CPXM1	-2.57777	0.00161782	chr20	2801211	2802025	-0.97	0.00137	Promoter (<=1kb)	TRUE	3.54777		MTHFR	3.0016
ENSG00000258171	LINC02412	-1.98901	0.00633393	chr12	93173812	93174883	-1.55	1.22e-05	Promoter (<=1kb)	TRUE	3.53901		EPHA2	2.99069
ENSG00000172425	TTC36	-2.37315	1.64009e-29	chr11	118526918	118527665	-1.16	4.05e-05	Promoter (<=1kb)	TRUE	3.53315		FAM53C	2.98742
ENSG00000152463	OLAH	-2.00193	8.03594e-22	chr10	15035868	15036364	-1.53	0.00127	Promoter (2-3kb)	TRUE	3.53193		POU6F2	2.98599
ENSG00000117305	HMGCL	-2.60082	3.72642e-22	chr1	23838131	23839261	-0.93	0.0034	Promoter (<=1kb)	TRUE	3.53082		RASD2	2.98112
ENSG00000117305	HMGCL	-2.60082	3.72642e-22	chr1	23825088	23825634	-0.93	0.0206	Promoter (<=1kb)	TRUE	3.53082		PPP1R32	2.97643
ENSG00000269994	AL513318.2	-1.95021	0.0207443	chr9	87041889	87042397	-1.55	0.000105	Promoter (<=1kb)	TRUE	3.50021		AC002076.2	2.97581
ENSG00000074964	ARHGEF10L	-1.11995	8.31091e-07	chr1	17696472	17696931	-2.38	1.02e-08	Promoter (2-3kb)	TRUE	3.49995		INPP5A	2.97556
ENSG00000114853	ZBTB47	-2.08801	4.97986e-06	chr3	42652630	42653193	-1.41	7.56e-06	Promoter (<=1kb)	TRUE	3.49801		RAB11FIP3	2.96924
ENSG00000205744	DENND1C	-1.49074	1.8381e-05	chr19	6484298	6485049	-2	5.86e-08	Promoter (1-2kb)	TRUE	3.49074		PPIC	2.95589
ENSG00000132359	RAP1GAP2	-1.72514	1.24113e-27	chr17	2797648	2798111	-1.75	1.45e-05	Promoter (1-2kb)	TRUE	3.47514		ACVR2B	2.95455
ENSG00000035664	DAPK2	-1.47704	0.000550497	chr15	63925493	63926225	-1.99	1.3e-07	Promoter (<=1kb)	TRUE	3.46704		DDAH1	2.95126
ENSG00000060656	PTPRU	-1.98786	3.18534e-20	chr1	29239042	29239730	-1.47	2.06e-07	Promoter (2-3kb)	TRUE	3.45786		GDF15	2.94638
ENSG00000164171	ITGA2	-2.55731	8.95664e-05	chr5	52989043	52989990	-0.9	0.0034	Promoter (<=1kb)	TRUE	3.45731		PRRT3	2.94016
ENSG00000141526	SLC16A3	-1.43384	1.30058e-28	chr17	82228963	82229446	-2.02	2.09e-11	Promoter (<=1kb)	TRUE	3.45384		DMAC1	2.93922
ENSG00000170091	NSG2	-2.6496	0.000622734	chr5	174045430	174045790	-0.79	0.00813	Promoter (<=1kb)	TRUE	3.4396		LRIG1	2.93359
ENSG00000116133	DHCR24	-2.05674	7.41192e-33	chr1	54886950	54888692	-1.38	7.88e-06	Promoter (<=1kb)	TRUE	3.43674		ATG7	2.92864
ENSG00000168036	CTNNB1	-1.02372	4.5089e-07	chr3	41221615	41223027	-2.41	1.92e-12	Promoter (<=1kb)	TRUE	3.43372		PADI3	2.90862
ENSG00000109066	TMEM104	-1.18228	9.92928e-06	chr17	74777947	74778819	-2.25	1.42e-12	Promoter (1-2kb)	TRUE	3.43228		PLPP6	2.90097
ENSG00000277363	SRCIN1	-2.17915	3.56664e-18	chr17	38608513	38608848	-1.25	0.0126	Promoter (2-3kb)	TRUE	3.42915		SLC2A10	2.89908
ENSG00000129538	RNASE1	-1.89808	3.77015e-06	chr14	20800916	20802105	-1.53	3.98e-06	Promoter (<=1kb)	TRUE	3.42808		SPATA24	2.89847
ENSG00000171444	MCC	-1.2129	0.0327038	chr5	113488404	113489642	-2.21	1.46e-09	Promoter (<=1kb)	TRUE	3.4229		SH3BP5	2.8977
ENSG00000038382	TRIO	-2.53803	1.35582e-09	chr5	14142896	14143528	-0.88	0.0122	Promoter (<=1kb)	TRUE	3.41803		PLA2G2A	2.89554
ENSG00000013288	MAN2B2	-1.23729	2.46999e-08	chr4	6576427	6576812	-2.16	3.65e-07	Promoter (1-2kb)	TRUE	3.39729		AC005476.2	2.89119
ENSG00000182378	PLCXD1	-1.58045	2.53245e-10	chrX	276011	277068	-1.81	1.24e-10	Promoter (<=1kb)	TRUE	3.39045		LOXL2	2.88813
ENSG00000011105	TSPAN9	-2.26885	1.0062e-18	chr12	3076706	3077410	-1.12	0.000149	Promoter (<=1kb)	TRUE	3.38885		TRAK1	2.88135
ENSG00000185989	RASA3	-1.92671	8.81308e-30	chr13	114132302	114132975	-1.46	1.04e-05	Promoter (<=1kb)	TRUE	3.38671		KIAA2026	2.88095
ENSG00000144824	PHLDB2	-2.2536	0.000695979	chr3	111859056	111859449	-1.12	0.00266	Promoter (<=1kb)	TRUE	3.3736		LURAP1L	2.87889
ENSG00000104177	MYEF2	-2.13127	3.91469e-21	chr15	48177694	48178420	-1.24	0.000855	Promoter (<=1kb)	TRUE	3.37127		NAV2	2.87517
ENSG00000157388	CACNA1D	-1.41807	2.36475e-22	chr3	53671401	53672096	-1.94	1.13e-07	Promoter (<=1kb)	TRUE	3.35807		ADAMTSL4-AS1	2.87128
ENSG00000154310	TNIK	-2.5303	8.83355e-05	chr3	171459816	171461098	-0.82	0.0096	Promoter (<=1kb)	TRUE	3.3503		FBXO27	2.86966
ENSG00000006210	CX3CL1	-2.40022	5.7527e-15	chr16	57372231	57372577	-0.95	0.00332	Promoter (<=1kb)	TRUE	3.35022		DHRS3	2.86591
ENSG00000122861	PLAU	-1.94017	0.00065465	chr10	73906396	73907303	-1.41	8.99e-07	Promoter (1-2kb)	TRUE	3.35017		GLDN	2.86475
ENSG00000011105	TSPAN9	-2.26885	1.0062e-18	chr12	3202778	3203244	-1.07	0.00129	Promoter (1-2kb)	TRUE	3.33885		PSIP1	2.862
ENSG00000170412	GPRC5C	-2.40338	7.78375e-11	chr17	74442736	74443772	-0.93	0.00119	Promoter (<=1kb)	TRUE	3.33338		KRT86	2.85915
ENSG00000088367	EPB41L1	-1.75896	5.53057e-38	chr20	36169249	36171120	-1.57	9.11e-08	Promoter (2-3kb)	TRUE	3.32896		VASP	2.85859
ENSG00000073331	ALPK1	-2.3656	6.727e-26	chr4	112411767	112412038	-0.95	0.0123	Promoter (<=1kb)	TRUE	3.3156		VSIG10	2.85859
ENSG00000088280	ASAP3	-2.47378	3.83218e-36	chr1	23483997	23484797	-0.84	0.00347	Promoter (<=1kb)	TRUE	3.31378		C2	2.85811
ENSG00000167291	TBC1D16	-2.10008	1.09585e-42	chr17	79991624	79994192	-1.21	1.21e-05	Promoter (<=1kb)	TRUE	3.31008		ZDHHC21	2.85621
ENSG00000157388	CACNA1D	-1.41807	2.36475e-22	chr3	53664586	53665470	-1.89	4.76e-09	Promoter (<=1kb)	TRUE	3.30807		KLK2	2.85244
ENSG00000113070	HBEGF	-2.26294	7.18131e-07	chr5	140346363	140346955	-1.04	0.000434	Promoter (<=1kb)	TRUE	3.30294		PUM3	2.85198
ENSG00000107104	KANK1	-2.49039	1.24191e-24	chr9	734953	735516	-0.81	0.0404	Promoter (<=1kb)	TRUE	3.30039		SLC22A18	2.85059
ENSG00000215252	GOLGA8B	-2.18252	1.74241e-32	chr15	34583579	34583917	-1.1	0.00631	Promoter (<=1kb)	TRUE	3.28252		DNAJC22	2.85046
ENSG00000027075	PRKCH	-1.86193	2.3367e-18	chr14	61491005	61491550	-1.41	8.48e-07	Promoter (<=1kb)	TRUE	3.27193		FBXO41	2.84903
ENSG00000179163	FUCA1	-2.0425	2.54575e-28	chr1	23865123	23865936	-1.21	1.91e-05	Promoter (2-3kb)	TRUE	3.2525		DDIT4L	2.84835
ENSG00000155792	DEPTOR	-2.43078	3.7996e-21	chr8	119873243	119874374	-0.82	0.00477	Promoter (<=1kb)	TRUE	3.25078		STK32C	2.84534
ENSG00000143819	EPHX1	-1.19443	3.26158e-18	chr1	225826425	225826790	-2.05	8.68e-08	Promoter (1-2kb)	TRUE	3.24443		ADGRB2	2.84108
ENSG00000106993	CDC37L1	-1.35641	5.76769e-07	chr9	4678956	4679935	-1.88	1.92e-10	Promoter (<=1kb)	TRUE	3.23641		CPD	2.83882
ENSG00000027075	PRKCH	-1.86193	2.3367e-18	chr14	61485003	61485559	-1.37	3.07e-07	Promoter (<=1kb)	TRUE	3.23193		PROB1	2.83274
ENSG00000261359	PYCARD-AS1	-1.69923	0.00410483	chr16	31200595	31202220	-1.53	7.03e-07	Promoter (<=1kb)	TRUE	3.22923		SORBS3	2.83063
ENSG00000173890	GPR160	-1.89764	7.68914e-33	chr3	170046255	170046980	-1.33	1.09e-05	Promoter (2-3kb)	TRUE	3.22764		HDGFL3	2.82716
ENSG00000145779	TNFAIP8	-1.99504	1.26139e-05	chr5	119335035	119335416	-1.23	0.00336	Promoter (1-2kb)	TRUE	3.22504		MMP15	2.8261
ENSG00000174705	SH3PXD2B	-2.21537	1.36754e-10	chr5	172350577	172350988	-0.99	0.000767	Promoter (<=1kb)	TRUE	3.20537		CRELD1	2.81908
ENSG00000259163	AL096869.2	-2.06425	0.0038098	chr14	90641264	90642505	-1.14	0.00111	Promoter (<=1kb)	TRUE	3.20425		PGM1	2.818
ENSG00000021762	OSBPL5	-2.36209	3.47013e-61	chr11	3130246	3130948	-0.84	0.0072	Promoter (<=1kb)	TRUE	3.20209		MAP3K12	2.81778
ENSG00000122884	P4HA1	-1.70555	2.1677e-26	chr10	73017865	73018880	-1.49	1.8e-05	Promoter (1-2kb)	TRUE	3.19555		TUBB3	2.80328
ENSG00000132821	VSTM2L	-2.49225	9.5334e-05	chr20	37901734	37903294	-0.7	0.0125	Promoter (<=1kb)	TRUE	3.19225		HDAC4	2.7997
ENSG00000170949	ZNF160	-1.77495	1.03134e-12	chr19	53103035	53103972	-1.41	3.7e-07	Promoter (<=1kb)	TRUE	3.18495		JMJD1C	2.79764
ENSG00000176046	NUPR1	-2.07765	3.20259e-40	chr16	28538677	28539495	-1.09	9.77e-05	Promoter (<=1kb)	TRUE	3.16765		PLEKHG2	2.7964
ENSG00000008226	DLEC1	-2.36656	3.94644e-11	chr3	38116910	38118429	-0.79	0.0227	Promoter (<=1kb)	TRUE	3.15656		EPS8	2.79177
ENSG00000131759	RARA	-1.16397	8.76854e-19	chr17	40352766	40353342	-1.99	1.52e-09	Promoter (1-2kb)	TRUE	3.15397		RCL1	2.78702
ENSG00000114737	CISH	-2.09728	4.93674e-33	chr3	50611729	50612255	-1.04	0.000176	Promoter (<=1kb)	TRUE	3.13728		LY6E	2.78608
ENSG00000185633	NDUFA4L2	-1.9886	5.77512e-05	chr12	57240633	57241188	-1.14	0.000129	Promoter (<=1kb)	TRUE	3.1286		AURKAPS2	2.78368
ENSG00000130766	SESN2	-2.10932	2.80534e-11	chr1	28258887	28259940	-1.01	0.000255	Promoter (<=1kb)	TRUE	3.11932		AZGP1	2.78047
ENSG00000008394	MGST1	-1.53324	5.83947e-19	chr12	16350163	16350987	-1.58	1.38e-07	Promoter (<=1kb)	TRUE	3.11324		GAA	2.77577
ENSG00000116852	KIF21B	-2.10058	5.35283e-08	chr1	201019431	201020649	-1.01	0.000594	Promoter (2-3kb)	TRUE	3.11058		UHRF2	2.76981
ENSG00000142623	PADI1	-2.22579	2.03925e-05	chr1	17237055	17237597	-0.88	0.00283	Promoter (2-3kb)	TRUE	3.10579		HDAC11	2.76824
ENSG00000103811	CTSH	-1.90174	1.43692e-12	chr15	78930914	78931276	-1.2	0.000275	Promoter (<=1kb)	TRUE	3.10174		PJA2	2.76743
ENSG00000130304	SLC27A1	-1.83149	3.21098e-17	chr19	17499173	17500113	-1.27	1.6e-05	Promoter (<=1kb)	TRUE	3.10149		ZNF862	2.76588
ENSG00000165449	SLC16A9	-2.04549	0.000235179	chr10	59709458	59710010	-1.04	0.0089	Promoter (<=1kb)	TRUE	3.08549		HACE1	2.75898
ENSG00000203799	CCDC162P	-1.68408	0.000519167	chr6	109336277	109337478	-1.4	2.74e-07	Promoter (1-2kb)	TRUE	3.08408		LINC00514	2.75887
ENSG00000213949	ITGA1	-1.2922	1.85141e-06	chr5	52864282	52865309	-1.78	1.03e-07	Promoter (<=1kb)	TRUE	3.0722		AC073316.1	2.7588
ENSG00000175309	PHYKPL	-1.77217	1.97062e-20	chr5	178223218	178224593	-1.3	2.66e-06	Promoter (<=1kb)	TRUE	3.07217		ARHGAP40	2.75448
ENSG00000182378	PLCXD1	-1.58045	2.53245e-10	chrX	283150	283609	-1.49	1.84e-08	Promoter (<=1kb)	TRUE	3.07045		PANX1	2.75087
ENSG00000062282	DGAT2	-1.35115	0.0166366	chr11	75759548	75760235	-1.71	6.37e-09	Promoter (<=1kb)	TRUE	3.06115		FUT3	2.74132
ENSG00000253706	AC011632.1	-1.821	1.27215e-05	chr8	74866513	74867259	-1.24	0.000105	Promoter (<=1kb)	TRUE	3.061		VIPR1	2.73447
ENSG00000100344	PNPLA3	-1.23961	8.04592e-09	chr22	43925559	43926228	-1.81	0.00419	Promoter (1-2kb)	TRUE	3.04961		PLEKHG1	2.73391
ENSG00000068831	RASGRP2	-2.39018	0.00632496	chr11	64742834	64744306	-0.65	0.0465	Promoter (<=1kb)	TRUE	3.04018		MATR3	2.73067
ENSG00000204618	RNF39	-1.79124	0.00381942	chr6	30075692	30076549	-1.23	0.001	Promoter (<=1kb)	TRUE	3.02124		VPS13D	2.72817
ENSG00000173599	PC	-1.52952	2.38246e-13	chr11	66956852	66957180	-1.49	3.87e-07	Promoter (<=1kb)	TRUE	3.01952		FAM43A	2.72431
ENSG00000136854	STXBP1	-1.77374	5.29851e-23	chr9	127644184	127645175	-1.24	1.6e-05	Promoter (1-2kb)	TRUE	3.01374		MACF1	2.72343
ENSG00000144824	PHLDB2	-2.2536	0.000695979	chr3	111860454	111860792	-0.76	0.0458	Promoter (<=1kb)	TRUE	3.0136		DHRS7	2.72153
ENSG00000171631	P2RY6	-1.77858	2.24807e-26	chr11	73269564	73270192	-1.23	4.67e-05	Promoter (<=1kb)	TRUE	3.00858		TMEM120B	2.72083
ENSG00000114251	WNT5A	-2.35814	0.000535661	chr3	55485028	55485527	-0.65	0.0468	Promoter (2-3kb)	TRUE	3.00814		PLEKHG3	2.71202
ENSG00000197956	S100A6	-1.71767	3.59175e-19	chr1	153535600	153536866	-1.29	6.55e-06	Promoter (<=1kb)	TRUE	3.00767		IL4R	2.70346
ENSG00000168528	SERINC2	-1.73558	5.39978e-38	chr1	31416160	31416696	-1.27	6.46e-06	Promoter (2-3kb)	TRUE	3.00558		IL6R	2.69976
ENSG00000177000	MTHFR	-1.6016	3.95601e-18	chr1	11803536	11803790	-1.4	1.68e-07	Promoter (<=1kb)	TRUE	3.0016		GOLGA7B	2.68186
ENSG00000142627	EPHA2	-1.36069	1.06205e-08	chr1	16155857	16156391	-1.63	2.9e-06	Promoter (<=1kb)	TRUE	2.99069		TPT1-AS1	2.6812
ENSG00000120709	FAM53C	-2.15742	1.21994e-38	chr5	138337372	138338573	-0.83	0.00228	Promoter (<=1kb)	TRUE	2.98742		SLC7A11	2.67631
ENSG00000106536	POU6F2	-2.16599	1.40203e-08	chr7	39013090	39013527	-0.82	0.0393	Promoter (<=1kb)	TRUE	2.98599		MLPH	2.67582
ENSG00000100302	RASD2	-2.28112	2.44152e-25	chr22	35538631	35539042	-0.7	0.0229	Promoter (1-2kb)	TRUE	2.98112		AL137145.2	2.67452
ENSG00000162148	PPP1R32	-2.03643	3.41067e-17	chr11	61488370	61489115	-0.94	0.00718	Promoter (<=1kb)	TRUE	2.97643		SPTB	2.66172
ENSG00000278388	AC002076.2	-2.19581	0.0167375	chr7	93914547	93914982	-0.78	0.0329	Promoter (<=1kb)	TRUE	2.97581		TRIM62	2.65912
ENSG00000068383	INPP5A	-1.40556	1.36185e-05	chr10	132606870	132607208	-1.57	0.000793	Promoter (<=1kb)	TRUE	2.97556		ECE1	2.64821
ENSG00000090565	RAB11FIP3	-1.01924	1.89071e-13	chr16	476087	476487	-1.95	6.25e-10	Promoter (1-2kb)	TRUE	2.96924		EYA2	2.63982
ENSG00000168938	PPIC	-1.28589	6.37057e-05	chr5	123036075	123037218	-1.67	1.79e-08	Promoter (<=1kb)	TRUE	2.95589		SEMA4D	2.63895
ENSG00000114739	ACVR2B	-1.69455	3.42873e-15	chr3	38453038	38454339	-1.26	1.71e-05	Promoter (<=1kb)	TRUE	2.95455		CPAMD8	2.6368
ENSG00000153904	DDAH1	-1.42126	1.0822e-05	chr1	85464748	85465488	-1.53	0.0167	Promoter (<=1kb)	TRUE	2.95126		MIR2052HG	2.62884
ENSG00000120709	FAM53C	-2.15742	1.21994e-38	chr5	138331609	138332187	-0.79	0.0104	Promoter (<=1kb)	TRUE	2.94742		MCL1	2.62461
ENSG00000130513	GDF15	-2.22638	1.31205e-25	chr19	18385890	18386316	-0.72	0.0174	Promoter (<=1kb)	TRUE	2.94638		PLXNA2	2.61657
ENSG00000171444	MCC	-1.2129	0.0327038	chr5	113294579	113295213	-1.73	4.25e-05	Promoter (<=1kb)	TRUE	2.9429		2011-09-01	2.61555
ENSG00000163704	PRRT3	-1.46016	2.89055e-18	chr3	9952084	9952463	-1.48	1.4e-05	Promoter (<=1kb)	TRUE	2.94016		NDFIP1	2.60767
ENSG00000137038	DMAC1	-1.48922	0.000262005	chr9	7798985	7800195	-1.45	9.78e-07	Promoter (<=1kb)	TRUE	2.93922		AACS	2.59953
ENSG00000184640	2009-09-01	-1.01441	9.82082e-12	chr17	77372433	77373220	-1.92	4.22e-07	Promoter (<=1kb)	TRUE	2.93441		GRTP1	2.59558
ENSG00000144749	LRIG1	-1.31359	6.1038e-05	chr3	66418516	66418857	-1.62	0.0236	Promoter (<=1kb)	TRUE	2.93359		CLIP2	2.58892
ENSG00000215483	LINC00598	-2.04112	0.00147294	chr13	40536686	40537458	-0.89	0.0314	Promoter (<=1kb)	TRUE	2.93112		LCP2	2.5713
ENSG00000197548	ATG7	-1.68864	5.87384e-15	chr3	11334530	11335452	-1.24	0.000211	Promoter (1-2kb)	TRUE	2.92864		PLCG2	2.56742
ENSG00000142619	PADI3	-1.84862	2.2329e-19	chr1	17250352	17251381	-1.06	0.000101	Promoter (1-2kb)	TRUE	2.90862		OXTR	2.56271
ENSG00000205808	PLPP6	-1.34097	0.0324949	chr9	4662114	4663190	-1.56	5.82e-09	Promoter (<=1kb)	TRUE	2.90097		AC015712.1	2.5546
ENSG00000197496	SLC2A10	-1.49908	1.0366e-09	chr20	46714197	46715787	-1.4	4.92e-06	Promoter (<=1kb)	TRUE	2.89908		TJP3	2.55364
ENSG00000170469	SPATA24	-1.98847	9.72766e-05	chr5	139403408	139404417	-0.91	0.000657	Promoter (<=1kb)	TRUE	2.89847		ZNF556	2.55041
ENSG00000131370	SH3BP5	-2.0677	0.0124761	chr3	15331898	15332851	-0.83	0.00466	Promoter (<=1kb)	TRUE	2.8977		PARS2	2.54546
ENSG00000188257	PLA2G2A	-1.21554	0.00132395	chr1	19979593	19980722	-1.68	3.38e-06	Promoter (<=1kb)	TRUE	2.89554		AC005840.2	2.54239
ENSG00000103811	CTSH	-1.90174	1.43692e-12	chr15	78929640	78930363	-0.99	0.00119	Promoter (1-2kb)	TRUE	2.89174		EIF4G3	2.535
ENSG00000259146	AC005476.2	-1.88119	0.00147246	chr14	71321822	71322231	-1.01	0.0011	Promoter (<=1kb)	TRUE	2.89119		RANBP6	2.53416
ENSG00000134013	LOXL2	-1.44813	0.0207179	chr8	23370451	23371247	-1.44	0.000329	Promoter (<=1kb)	TRUE	2.88813		PSTPIP2	2.52427
ENSG00000145779	TNFAIP8	-1.99504	1.26139e-05	chr5	119268020	119268985	-0.89	0.00294	Promoter (<=1kb)	TRUE	2.88504		PDIK1L	2.51911
ENSG00000182606	TRAK1	-1.34135	2.1474e-24	chr3	42159775	42160453	-1.54	2.54e-06	Promoter (<=1kb)	TRUE	2.88135		NXPH4	2.51836
ENSG00000183354	KIAA2026	-1.47095	2.006e-21	chr9	6006959	6008673	-1.41	1.56e-07	Promoter (<=1kb)	TRUE	2.88095		ARHGDIB	2.51625
ENSG00000153714	LURAP1L	-1.18889	0.0431002	chr9	12775959	12776716	-1.69	2.71e-07	Promoter (<=1kb)	TRUE	2.87889		FAH	2.50942
ENSG00000166833	NAV2	-2.18517	3.53032e-22	chr11	20022067	20023342	-0.69	0.0462	Promoter (<=1kb)	TRUE	2.87517		RPGRIP1	2.50848
ENSG00000203804	ADAMTSL4-AS1	-1.30128	0.0217832	chr1	150571962	150572412	-1.57	1.34e-07	Promoter (2-3kb)	TRUE	2.87128		KIAA1522	2.50319
ENSG00000161243	FBXO27	-1.65966	0.00048656	chr19	39033208	39033715	-1.21	0.00022	Promoter (<=1kb)	TRUE	2.86966		LHFPL4	2.50032
ENSG00000162496	DHRS3	-1.57591	4.01738e-24	chr1	12595918	12596728	-1.29	6.13e-05	Promoter (<=1kb)	TRUE	2.86591		GTF2IRD1	2.50016
ENSG00000186417	GLDN	-1.46475	8.19135e-06	chr15	51359878	51360524	-1.4	0.00043	Promoter (<=1kb)	TRUE	2.86475		SQOR	2.4999
ENSG00000164985	PSIP1	-1.112	5.64168e-13	chr9	15510450	15511527	-1.75	6.32e-09	Promoter (<=1kb)	TRUE	2.862		AC008985.1	2.48323
ENSG00000170442	KRT86	-2.19915	1.2742e-09	chr12	52248716	52249452	-0.66	0.0288	Promoter (<=1kb)	TRUE	2.85915		RBM5	2.47265
ENSG00000125753	VASP	-1.28859	7.87052e-14	chr19	45520873	45521545	-1.57	1.62e-07	Promoter (1-2kb)	TRUE	2.85859		SUCLG2	2.47116
ENSG00000176834	VSIG10	-1.33859	4.12266e-08	chr12	118103868	118104129	-1.52	0.000179	Promoter (<=1kb)	TRUE	2.85859		SLC6A6	2.46488
ENSG00000166278	C2	-2.09811	0.000245416	chr6	31919798	31920363	-0.76	0.026	Promoter (<=1kb)	TRUE	2.85811		ANK3	2.46326
ENSG00000175893	ZDHHC21	-1.24621	5.69664e-05	chr9	14692978	14693582	-1.61	2.71e-06	Promoter (<=1kb)	TRUE	2.85621		ARHGAP26	2.46302
ENSG00000167751	KLK2	-2.19244	2.52475e-05	chr19	50870357	50870931	-0.66	0.0297	Promoter (<=1kb)	TRUE	2.85244		ZNF445	2.45916
ENSG00000080608	PUM3	-1.00198	2.78996e-09	chr9	2843520	2844413	-1.85	8.99e-12	Promoter (<=1kb)	TRUE	2.85198		ITPRIPL2	2.45862
ENSG00000110628	SLC22A18	-1.47059	4.693e-21	chr11	2899315	2899911	-1.38	2.45e-07	Promoter (<=1kb)	TRUE	2.85059		MPP3	2.44991
ENSG00000178401	DNAJC22	-2.04046	1.53051e-13	chr12	49347257	49348048	-0.81	0.0148	Promoter (<=1kb)	TRUE	2.85046		DUOX1	2.44933
ENSG00000163013	FBXO41	-1.83903	2.17185e-26	chr2	73269223	73269730	-1.01	0.00107	Promoter (<=1kb)	TRUE	2.84903		SPRED2	2.44461
ENSG00000145358	DDIT4L	-2.09835	0.0177857	chr4	100190076	100191138	-0.75	0.0121	Promoter (<=1kb)	TRUE	2.84835		ALS2CL	2.44333
ENSG00000165752	STK32C	-2.13534	1.06292e-27	chr10	132248925	132249699	-0.71	0.0405	Promoter (<=1kb)	TRUE	2.84534		SLC40A1	2.44222
ENSG00000143819	EPHX1	-1.19443	3.26158e-18	chr1	225813324	225813859	-1.65	4.34e-08	Promoter (2-3kb)	TRUE	2.84443		HECTD1	2.4382
ENSG00000121753	ADGRB2	-1.58108	0.00225947	chr1	31755150	31755741	-1.26	3.04e-05	Promoter (<=1kb)	TRUE	2.84108		EMP1	2.42906
ENSG00000108582	CPD	-1.11882	3.04491e-14	chr17	30450528	30451263	-1.72	2.13e-10	Promoter (<=1kb)	TRUE	2.83882		BBOF1	2.42499
ENSG00000228672	PROB1	-1.18274	0.0132714	chr5	139397470	139398242	-1.65	1.22e-06	Promoter (1-2kb)	TRUE	2.83274		TKT	2.42222
ENSG00000120896	SORBS3	-2.07063	2.15907e-09	chr8	22549112	22549865	-0.76	0.0307	Promoter (1-2kb)	TRUE	2.83063		PARVB	2.41613
ENSG00000166503	HDGFL3	-1.98716	3.9551e-11	chr15	83210595	83211027	-0.84	0.0198	Promoter (2-3kb)	TRUE	2.82716		PRDM1	2.40413
ENSG00000102996	MMP15	-1.9961	5.19782e-25	chr16	58027349	58028040	-0.83	0.0197	Promoter (1-2kb)	TRUE	2.8261		CDKN1A	2.39169
ENSG00000163703	CRELD1	-2.11908	1.16233e-21	chr3	9932901	9934208	-0.7	0.018	Promoter (<=1kb)	TRUE	2.81908		STIM1	2.38637
ENSG00000079739	PGM1	-2.138	5.36527e-10	chr1	63593352	63594708	-0.68	0.0444	Promoter (<=1kb)	TRUE	2.818		CYP4F23P	2.3787
ENSG00000139625	MAP3K12	-1.83778	1.48135e-22	chr12	53481569	53482331	-0.98	0.00596	Promoter (<=1kb)	TRUE	2.81778		PPM1M	2.37321
ENSG00000167191	GPRC5B	-2.00623	0.000354717	chr16	19884833	19885415	-0.8	0.0296	Promoter (<=1kb)	TRUE	2.80623		TRIB3	2.3663
ENSG00000258947	TUBB3	-2.08328	0.0159636	chr16	89923219	89923518	-0.72	0.0354	Promoter (<=1kb)	TRUE	2.80328		FASN	2.36472
ENSG00000068024	HDAC4	-1.5397	6.31786e-05	chr2	239157180	239158804	-1.26	1.18e-06	Promoter (1-2kb)	TRUE	2.7997		CBX4	2.36461
ENSG00000171988	JMJD1C	-1.07764	1.47063e-08	chr10	63465120	63466410	-1.72	3.11e-09	Promoter (<=1kb)	TRUE	2.79764		TMCC3	2.35168
ENSG00000090924	PLEKHG2	-2.1264	1.54096e-13	chr19	39411417	39412789	-0.67	0.0199	Promoter (<=1kb)	TRUE	2.7964		AC011379.2	2.33905
ENSG00000151491	EPS8	-1.61177	0.000228496	chr12	15788837	15790066	-1.18	3.58e-05	Promoter (<=1kb)	TRUE	2.79177		PEX14	2.33853
ENSG00000060656	PTPRU	-1.98786	3.18534e-20	chr1	29236203	29236717	-0.8	0.00743	Promoter (<=1kb)	TRUE	2.78786		SNHG12	2.33584
ENSG00000120158	RCL1	-1.16702	3.1956e-05	chr9	4792449	4793269	-1.62	1.02e-09	Promoter (<=1kb)	TRUE	2.78702		C20orf194	2.33296
ENSG00000160932	LY6E	-1.54608	1.43401e-24	chr8	143015877	143016645	-1.24	1.13e-05	Promoter (1-2kb)	TRUE	2.78608		FAM117A	2.33259
ENSG00000230165	AURKAPS2	-2.05368	1.00689e-07	chr10	114245451	114245922	-0.73	0.0196	Promoter (<=1kb)	TRUE	2.78368		LMO4	2.33018
ENSG00000152463	OLAH	-2.00193	8.03594e-22	chr10	15046670	15047502	-0.78	0.0126	Promoter (2-3kb)	TRUE	2.78193		FAM174A	2.32445
ENSG00000160862	AZGP1	-2.06047	1.53113e-46	chr7	99975836	99976357	-0.72	0.013	Promoter (<=1kb)	TRUE	2.78047		PAQR7	2.32201
ENSG00000160862	AZGP1	-2.06047	1.53113e-46	chr7	99973636	99974181	-0.72	0.0164	Promoter (1-2kb)	TRUE	2.78047		RELL2	2.31733
ENSG00000171298	GAA	-1.56577	1.82893e-24	chr17	80102728	80103302	-1.21	4.14e-06	Promoter (1-2kb)	TRUE	2.77577		PFN2	2.31718
ENSG00000147854	UHRF2	-1.11981	5.39105e-07	chr9	6412798	6413577	-1.65	6.13e-08	Promoter (<=1kb)	TRUE	2.76981		CELSR1	2.3082
ENSG00000163517	HDAC11	-1.71824	5.83502e-25	chr3	13484033	13486043	-1.05	0.000216	Promoter (2-3kb)	TRUE	2.76824		SLC6A8	2.30498
ENSG00000198961	PJA2	-1.20743	1.98044e-06	chr5	109380770	109381158	-1.56	0.000378	Promoter (2-3kb)	TRUE	2.76743		SH3KBP1	2.30019
ENSG00000106479	ZNF862	-1.71588	5.81264e-12	chr7	149854578	149855156	-1.05	0.00185	Promoter (<=1kb)	TRUE	2.76588		PRDX2	2.29965
ENSG00000085382	HACE1	-1.84898	6.50684e-13	chr6	104859558	104860205	-0.91	0.00138	Promoter (<=1kb)	TRUE	2.75898		CEP120	2.28823
ENSG00000262152	LINC00514	-1.93887	0.0415493	chr16	2991075	2991439	-0.82	0.0321	Promoter (<=1kb)	TRUE	2.75887		ATP10B	2.28688
ENSG00000217455	AC073316.1	-1.8288	0.00203067	chr7	3174618	3175075	-0.93	0.0459	Promoter (<=1kb)	TRUE	2.7588		IDI2-AS1	2.27965
ENSG00000171298	GAA	-1.56577	1.82893e-24	chr17	80111305	80112098	-1.19	2.38e-05	Promoter (<=1kb)	TRUE	2.75577		PGD	2.27804
ENSG00000124143	ARHGAP40	-1.50448	3.59693e-14	chr20	38628899	38629415	-1.25	0.000117	Promoter (1-2kb)	TRUE	2.75448		ROBO1	2.27747
ENSG00000110218	PANX1	-1.69087	0.0356495	chr11	94128498	94129506	-1.06	0.0001	Promoter (<=1kb)	TRUE	2.75087		EDEM1	2.26885
ENSG00000173890	GPR160	-1.89764	7.68914e-33	chr3	170037376	170038546	-0.85	0.00495	Promoter (<=1kb)	TRUE	2.74764		ANKHD1	2.26427
ENSG00000171124	FUT3	-1.94132	6.49447e-13	chr19	5850358	5851892	-0.8	0.00891	Promoter (<=1kb)	TRUE	2.74132		TMEM150A	2.2591
ENSG00000163013	FBXO41	-1.83903	2.17185e-26	chr2	73284453	73285052	-0.9	0.0204	Promoter (<=1kb)	TRUE	2.73903		MBNL2	2.25721
ENSG00000114812	VIPR1	-1.84447	9.5835e-30	chr3	42502288	42502927	-0.89	0.00197	Promoter (<=1kb)	TRUE	2.73447		SOX9	2.25028
ENSG00000120278	PLEKHG1	-1.91391	9.25914e-10	chr6	150767436	150768024	-0.82	0.00642	Promoter (<=1kb)	TRUE	2.73391		SPTBN1	2.24444
ENSG00000179163	FUCA1	-2.0425	2.54575e-28	chr1	23868120	23868536	-0.69	0.0225	Promoter (<=1kb)	TRUE	2.7325		CD164	2.2421
ENSG00000175309	PHYKPL	-1.77217	1.97062e-20	chr5	178234622	178235432	-0.96	0.00995	Promoter (1-2kb)	TRUE	2.73217		CLMN	2.23946
ENSG00000015479	MATR3	-1.75067	0.00226965	chr5	139293321	139294236	-0.98	0.000747	Promoter (<=1kb)	TRUE	2.73067		GOLM1	2.23902
ENSG00000048707	VPS13D	-1.33817	2.48359e-20	chr1	12276207	12276510	-1.39	0.00582	Promoter (<=1kb)	TRUE	2.72817		APBB3	2.23791
ENSG00000185112	FAM43A	-1.90431	3.67275e-10	chr3	194685601	194686265	-0.82	0.0118	Promoter (<=1kb)	TRUE	2.72431		SAMD12	2.22539
ENSG00000127603	MACF1	-1.59343	4.57527e-12	chr1	39408436	39409329	-1.13	9.21e-05	Promoter (<=1kb)	TRUE	2.72343		KAZN	2.22073
ENSG00000100612	DHRS7	-1.30153	9.83336e-10	chr14	60151608	60152051	-1.42	2.27e-07	Promoter (1-2kb)	TRUE	2.72153		AVIL	2.21885
ENSG00000188735	TMEM120B	-1.78083	2.30125e-25	chr12	121754797	121755318	-0.94	0.0452	Promoter (2-3kb)	TRUE	2.72083		DBNDD1	2.21332
ENSG00000126822	PLEKHG3	-1.19202	2.10299e-10	chr14	64717473	64718377	-1.52	5.65e-09	Promoter (1-2kb)	TRUE	2.71202		PXMP4	2.20383
ENSG00000077238	IL4R	-1.71346	3.96756e-14	chr16	27313456	27314089	-0.99	0.00264	Promoter (<=1kb)	TRUE	2.70346		INPP5B	2.20181
ENSG00000160712	IL6R	-1.98976	1.0155e-36	chr1	154405009	154406754	-0.71	0.0165	Promoter (<=1kb)	TRUE	2.69976		COMMD10	2.19839
ENSG00000155265	GOLGA7B	-1.80186	0.000353028	chr10	97861455	97862215	-0.88	0.0233	Promoter (2-3kb)	TRUE	2.68186		PCBP4	2.19612
ENSG00000170919	TPT1-AS1	-1.1512	2.39389e-07	chr13	45372938	45373630	-1.53	1.05e-06	Promoter (1-2kb)	TRUE	2.6812		CYSTM1	2.1899
ENSG00000151012	SLC7A11	-1.48631	3.24333e-11	chr4	138223213	138223596	-1.19	0.00403	Promoter (<=1kb)	TRUE	2.67631		PNPLA7	2.18761
ENSG00000115648	MLPH	-1.50582	2.01145e-17	chr2	237508972	237510167	-1.17	3.78e-05	Promoter (<=1kb)	TRUE	2.67582		SNX9	2.18177
ENSG00000215244	AL137145.2	-1.88452	0.000732229	chr10	6279536	6279829	-0.79	0.0063	Promoter (1-2kb)	TRUE	2.67452		TGFBR2	2.18108
ENSG00000070182	SPTB	-1.88172	0.00138814	chr14	64764655	64765041	-0.78	0.0293	Promoter (<=1kb)	TRUE	2.66172		PDSS2	2.18033
ENSG00000169403	PTAFR	-1.88054	1.35434e-25	chr1	28193690	28194232	-0.78	0.0163	Promoter (<=1kb)	TRUE	2.66054		SYTL1	2.17623
ENSG00000116525	TRIM62	-1.58912	9.87885e-17	chr1	33176375	33176897	-1.07	0.000298	Promoter (<=1kb)	TRUE	2.65912		AES	2.1724
ENSG00000117298	ECE1	-1.00821	2.19943e-08	chr1	21276103	21276822	-1.64	2.31e-07	Promoter (2-3kb)	TRUE	2.64821		TWF2	2.16628
ENSG00000064655	EYA2	-1.67982	1.17255e-15	chr20	46894233	46895059	-0.96	0.00608	Promoter (<=1kb)	TRUE	2.63982		TLDC1	2.16408
ENSG00000187764	SEMA4D	-1.06895	9.09932e-06	chr9	89388127	89388640	-1.57	2.98e-06	Promoter (<=1kb)	TRUE	2.63895		SIL1	2.16374
ENSG00000173890	GPR160	-1.89764	7.68914e-33	chr3	170049324	170050312	-0.74	0.0139	Promoter (<=1kb)	TRUE	2.63764		MTFR1L	2.15741
ENSG00000160111	CPAMD8	-1.5868	0.000583688	chr19	17025091	17026204	-1.05	0.00102	Promoter (<=1kb)	TRUE	2.6368		ARF4	2.14849
ENSG00000254349	MIR2052HG	-1.33884	0.00641381	chr8	74599494	74600536	-1.29	8.16e-06	Promoter (<=1kb)	TRUE	2.62884		CCNG1	2.14636
ENSG00000157388	CACNA1D	-1.41807	2.36475e-22	chr3	53799681	53800549	-1.21	1.09e-05	Promoter (<=1kb)	TRUE	2.62807		PYGM	2.13864
ENSG00000143384	MCL1	-1.49461	2.53415e-25	chr1	150578729	150580096	-1.13	2.47e-05	Promoter (<=1kb)	TRUE	2.62461		MRVI1	2.13725
ENSG00000076356	PLXNA2	-1.86657	1.34328e-09	chr1	208243885	208245640	-0.75	0.0174	Promoter (<=1kb)	TRUE	2.61657		TRNAU1AP	2.13406
ENSG00000138758	2011-09-01	-1.43555	9.04167e-12	chr4	77021491	77021999	-1.18	0.00852	Promoter (<=1kb)	TRUE	2.61555		MAN2A1	2.12924
ENSG00000131507	NDFIP1	-1.28767	4.82824e-15	chr5	142145085	142145595	-1.32	7.28e-05	Promoter (2-3kb)	TRUE	2.60767		TINAGL1	2.12759
ENSG00000081760	AACS	-1.25953	2.32283e-15	chr12	125094857	125095634	-1.34	3.99e-06	Promoter (2-3kb)	TRUE	2.59953		PCDH1	2.12596
ENSG00000139835	GRTP1	-1.62558	1.97957e-07	chr13	113363316	113364120	-0.97	0.000827	Promoter (<=1kb)	TRUE	2.59558		ZNF217	2.12353
ENSG00000106665	CLIP2	-1.64892	4.68214e-18	chr7	74380503	74381042	-0.94	0.0025	Promoter (<=1kb)	TRUE	2.58892		DMXL1	2.11938
ENSG00000203799	CCDC162P	-1.68408	0.000519167	chr6	109294013	109294359	-0.9	0.00241	Promoter (<=1kb)	TRUE	2.58408		CEBPB	2.11059
ENSG00000043462	LCP2	-1.8913	0.0190629	chr5	170253835	170254540	-0.68	0.0391	Promoter (2-3kb)	TRUE	2.5713		RPS6KA1	2.10499
ENSG00000188735	TMEM120B	-1.78083	2.30125e-25	chr12	121773042	121773725	-0.79	0.0414	Promoter (2-3kb)	TRUE	2.57083		MIR4435-2HG	2.10165
ENSG00000157388	CACNA1D	-1.41807	2.36475e-22	chr3	53493939	53494680	-1.15	0.000385	Promoter (<=1kb)	TRUE	2.56807		SNORC	2.09941
ENSG00000197943	PLCG2	-1.53742	7.22519e-06	chr16	81888654	81890624	-1.03	0.00126	Promoter (<=1kb)	TRUE	2.56742		ERN1	2.09567
ENSG00000180914	OXTR	-1.58271	8.92093e-05	chr3	8769301	8769638	-0.98	0.0143	Promoter (<=1kb)	TRUE	2.56271		Z84492.1	2.09389
ENSG00000232386	AC015712.1	-1.9346	3.92668e-08	chr15	100849441	100850488	-0.62	0.0482	Promoter (<=1kb)	TRUE	2.5546		ZC3H12A	2.09087
ENSG00000105289	TJP3	-1.05364	3.76421e-11	chr19	3708302	3708536	-1.5	0.00014	Promoter (<=1kb)	TRUE	2.55364		LDLRAD4	2.08669
ENSG00000172000	ZNF556	-1.75041	0.00596331	chr19	2866960	2867416	-0.8	0.00888	Promoter (<=1kb)	TRUE	2.55041		MYO18A	2.08603
ENSG00000153714	LURAP1L	-1.18889	0.0431002	chr9	12774902	12775564	-1.36	8.42e-05	Promoter (<=1kb)	TRUE	2.54889		CLINT1	2.07917
ENSG00000162396	PARS2	-1.95546	0.00657792	chr1	54764210	54765076	-0.59	0.0442	Promoter (<=1kb)	TRUE	2.54546		INPP5J	2.07325
ENSG00000256433	AC005840.2	-1.63239	0.000193093	chr12	6392149	6393053	-0.91	0.000621	Promoter (<=1kb)	TRUE	2.54239		MST1	2.07049
ENSG00000075151	EIF4G3	-1.585	1.2969e-28	chr1	21176520	21177311	-0.95	0.0011	Promoter (<=1kb)	TRUE	2.535		CD163L1	2.06526
ENSG00000137040	RANBP6	-1.08416	0.000169759	chr9	6014872	6016147	-1.45	7.46e-06	Promoter (<=1kb)	TRUE	2.53416		CLCN6	2.06009
ENSG00000152229	PSTPIP2	-1.90427	1.18294e-11	chr18	46068808	46069685	-0.62	0.0326	Promoter (2-3kb)	TRUE	2.52427		SPATA7	2.05146
ENSG00000155265	GOLGA7B	-1.80186	0.000353028	chr10	97848797	97850373	-0.72	0.0289	Promoter (<=1kb)	TRUE	2.52186		SELENON	2.04997
ENSG00000175087	PDIK1L	-1.07911	9.82474e-06	chr1	26114215	26114859	-1.44	3.81e-07	Promoter (2-3kb)	TRUE	2.51911		APC2	2.04539
ENSG00000182379	NXPH4	-1.72836	3.96756e-14	chr12	57213403	57214683	-0.79	0.00735	Promoter (2-3kb)	TRUE	2.51836		TMF1	2.03693
ENSG00000111348	ARHGDIB	-1.10625	3.89728e-06	chr12	14960864	14961823	-1.41	7.76e-06	Promoter (<=1kb)	TRUE	2.51625		PIPOX	2.03174
ENSG00000103876	FAH	-1.42942	3.14197e-12	chr15	80160508	80161142	-1.08	0.00019	Promoter (<=1kb)	TRUE	2.50942		CHMP4BP1	2.0283
ENSG00000092200	RPGRIP1	-1.09848	0.00228813	chr14	21319871	21320652	-1.41	7.66e-07	Promoter (<=1kb)	TRUE	2.50848		CALM1	2.0273
ENSG00000162522	KIAA1522	-1.39319	8.44744e-23	chr1	32763011	32763544	-1.11	3.74e-05	Promoter (2-3kb)	TRUE	2.50319		ZNF607	2.02518
ENSG00000156959	LHFPL4	-1.46032	0.00484994	chr3	9552284	9552580	-1.04	0.00988	Promoter (<=1kb)	TRUE	2.50032		ZNF264	2.02238
ENSG00000006704	GTF2IRD1	-1.12016	2.27142e-11	chr7	74455075	74455696	-1.38	3.12e-06	Promoter (<=1kb)	TRUE	2.50016		TLCD2	2.01969
ENSG00000137767	SQOR	-1.4199	0.0473833	chr15	45634639	45635350	-1.08	0.000278	Promoter (<=1kb)	TRUE	2.4999		SIPA1	2.01769
ENSG00000278999	AC008985.1	-1.77323	0.00333963	chr19	47663264	47664643	-0.71	0.0115	Promoter (<=1kb)	TRUE	2.48323		SNX2	2.0171
ENSG00000116525	TRIM62	-1.58912	9.87885e-17	chr1	33180685	33182551	-0.89	0.00199	Promoter (<=1kb)	TRUE	2.47912		ACOT6	2.01688
ENSG00000003756	RBM5	-1.55265	5.83044e-22	chr3	50088446	50089499	-0.92	0.00258	Promoter (<=1kb)	TRUE	2.47265		TCAIM	2.00184
ENSG00000172340	SUCLG2	-1.56116	7.90836e-13	chr3	67654040	67654988	-0.91	0.000956	Promoter (<=1kb)	TRUE	2.47116		MYO5B	1.99128
ENSG00000131389	SLC6A6	-1.81488	1.97684e-12	chr3	14402110	14403001	-0.65	0.0283	Promoter (<=1kb)	TRUE	2.46488		JPH1	1.99127
ENSG00000114812	VIPR1	-1.84447	9.5835e-30	chr3	42489565	42490822	-0.62	0.0394	Promoter (<=1kb)	TRUE	2.46447		UBC	1.98656
ENSG00000151150	ANK3	-1.57326	1.65193e-29	chr10	60392387	60392703	-0.89	0.00582	Promoter (2-3kb)	TRUE	2.46326		TNFRSF1A	1.98629
ENSG00000145819	ARHGAP26	-1.33302	7.88312e-08	chr5	142874257	142875080	-1.13	0.000451	Promoter (<=1kb)	TRUE	2.46302		UBA7	1.98485
ENSG00000185219	ZNF445	-1.14916	6.53893e-09	chr3	44477382	44478135	-1.31	0.000206	Promoter (<=1kb)	TRUE	2.45916		ZMYM6	1.98426
ENSG00000205730	ITPRIPL2	-1.54862	0.000109057	chr16	19116810	19117443	-0.91	0.00364	Promoter (2-3kb)	TRUE	2.45862		DEPP1	1.9797
ENSG00000176834	VSIG10	-1.33859	4.12266e-08	chr12	118102149	118102696	-1.12	0.00554	Promoter (<=1kb)	TRUE	2.45859		RASAL1	1.97914
ENSG00000161647	MPP3	-1.01991	1.36708e-08	chr17	43822723	43823925	-1.43	5.06e-06	Promoter (1-2kb)	TRUE	2.44991		MANF	1.97817
ENSG00000137857	DUOX1	-1.50933	0.0110658	chr15	45146474	45147148	-0.94	0.00346	Promoter (<=1kb)	TRUE	2.44933		SLC25A37	1.9739
ENSG00000198369	SPRED2	-1.56461	3.13473e-13	chr2	65366648	65368109	-0.88	0.00122	Promoter (<=1kb)	TRUE	2.44461		UBE2J1	1.97271
ENSG00000178038	ALS2CL	-1.70333	1.00671e-18	chr3	46692623	46693863	-0.74	0.011	Promoter (<=1kb)	TRUE	2.44333		HSPA9	1.96681
ENSG00000138449	SLC40A1	-1.70222	2.99544e-07	chr2	189580407	189581965	-0.74	0.0296	Promoter (<=1kb)	TRUE	2.44222		EPB41	1.96632
ENSG00000167703	SLC43A2	-1.15956	1.74775e-09	chr17	1575817	1576342	-1.28	4.98e-05	Promoter (2-3kb)	TRUE	2.43956		CD164L2	1.96517
ENSG00000088367	EPB41L1	-1.75896	5.53057e-38	chr20	36093255	36094608	-0.68	0.0282	Promoter (<=1kb)	TRUE	2.43896		TMEM40	1.95915
ENSG00000092148	HECTD1	-1.0482	7.92863e-16	chr14	31165599	31166915	-1.39	5.15e-06	Promoter (1-2kb)	TRUE	2.4382		GNAS	1.95435
ENSG00000134531	EMP1	-1.12906	4.71241e-07	chr12	13208622	13209422	-1.3	2.54e-05	Promoter (2-3kb)	TRUE	2.42906		TTC21A	1.95398
ENSG00000119636	BBOF1	-1.30499	0.00016634	chr14	74028184	74029269	-1.12	0.0013	Promoter (2-3kb)	TRUE	2.42499		PDK3	1.95132
ENSG00000234444	ZNF736	-1.52337	0.00044189	chr7	64306852	64307736	-0.9	0.00106	Promoter (<=1kb)	TRUE	2.42337		AKR1B1	1.94703
ENSG00000163931	TKT	-1.40222	2.05341e-28	chr3	53243229	53243610	-1.02	0.00311	Promoter (1-2kb)	TRUE	2.42222		AGO1	1.94406
ENSG00000197548	ATG7	-1.68864	5.87384e-15	chr3	11272037	11272737	-0.73	0.0142	Promoter (<=1kb)	TRUE	2.41864		LINC00284	1.94072
ENSG00000188677	PARVB	-1.15613	0.00343394	chr22	44168246	44168789	-1.26	0.00212	Promoter (<=1kb)	TRUE	2.41613		ZMYM4	1.93626
ENSG00000119699	TGFB3	-1.35349	2.19001e-11	chr14	75981061	75982846	-1.06	0.000469	Promoter (<=1kb)	TRUE	2.41349		ITGA3	1.93469
ENSG00000057657	PRDM1	-1.21413	0.00113346	chr6	106085366	106086477	-1.19	1.04e-05	Promoter (<=1kb)	TRUE	2.40413		SEMA4B	1.92952
ENSG00000131759	RARA	-1.16397	8.76854e-19	chr17	40311148	40312165	-1.24	2.46e-05	Promoter (1-2kb)	TRUE	2.40397		WWP1	1.92626
ENSG00000171631	P2RY6	-1.77858	2.24807e-26	chr11	73271969	73272745	-0.62	0.0409	Promoter (<=1kb)	TRUE	2.39858		UPRT	1.92504
ENSG00000124762	CDKN1A	-1.70169	0.0138029	chr6	36678499	36678990	-0.69	0.0429	Promoter (<=1kb)	TRUE	2.39169		ZNF630	1.92453
ENSG00000167323	STIM1	-1.14637	2.34254e-09	chr11	3904723	3905938	-1.24	3.12e-05	Promoter (1-2kb)	TRUE	2.38637		TADA3	1.91327
ENSG00000269516	CYP4F23P	-1.6287	0.012387	chr19	15562799	15564092	-0.75	0.0191	Promoter (<=1kb)	TRUE	2.3787		CEP85	1.90399
ENSG00000048707	VPS13D	-1.33817	2.48359e-20	chr1	12478072	12478848	-1.04	0.000335	Promoter (<=1kb)	TRUE	2.37817		EXOSC7	1.90242
ENSG00000164088	PPM1M	-1.22321	2.44663e-05	chr3	52244223	52244614	-1.15	5.4e-05	Promoter (1-2kb)	TRUE	2.37321		NRBF2	1.89743
ENSG00000101255	TRIB3	-1.5263	2.56997e-27	chr20	381679	382104	-0.84	0.00124	Promoter (<=1kb)	TRUE	2.3663		JUNB	1.89615
ENSG00000169710	FASN	-1.78472	5.9328e-43	chr17	82097466	82098945	-0.58	0.0389	Promoter (<=1kb)	TRUE	2.36472		ATG14	1.88551
ENSG00000141582	CBX4	-1.70461	5.77473e-37	chr17	79835862	79837484	-0.66	0.0246	Promoter (<=1kb)	TRUE	2.36461		AL121906.2	1.88392
ENSG00000122884	P4HA1	-1.70555	2.1677e-26	chr10	73095920	73097279	-0.65	0.029	Promoter (<=1kb)	TRUE	2.35555		MMP24OS	1.87755
ENSG00000057704	TMCC3	-1.42168	3.95104e-09	chr12	94614047	94614703	-0.93	0.0145	Promoter (1-2kb)	TRUE	2.35168		EMC3	1.87138
ENSG00000254363	AC011379.2	-1.11905	0.0372746	chr5	140156913	140157794	-1.22	6.23e-06	Promoter (<=1kb)	TRUE	2.33905		C15orf62	1.87042
ENSG00000142655	PEX14	-1.21853	4.70005e-05	chr1	10474671	10475375	-1.12	0.000201	Promoter (<=1kb)	TRUE	2.33853		SNX3	1.86072
ENSG00000197989	SNHG12	-1.12584	2.58144e-12	chr1	28581257	28582419	-1.21	8.57e-06	Promoter (<=1kb)	TRUE	2.33584		BRK1	1.85635
ENSG00000088854	C20orf194	-1.31296	4.81536e-09	chr20	3312862	3313826	-1.02	0.000824	Promoter (2-3kb)	TRUE	2.33296		CCSER1	1.85517
ENSG00000121104	FAM117A	-1.58259	0.0211249	chr17	49729908	49731049	-0.75	0.0348	Promoter (1-2kb)	TRUE	2.33259		CLIC4	1.85307
ENSG00000143013	LMO4	-1.41018	7.26505e-13	chr1	87328268	87329008	-0.92	0.00102	Promoter (<=1kb)	TRUE	2.33018		AP1G2	1.85058
ENSG00000138758	2011-09-01	-1.43555	9.04167e-12	chr4	76949526	76950033	-0.89	0.0422	Promoter (<=1kb)	TRUE	2.32555		ZC2HC1A	1.83856
ENSG00000174132	FAM174A	-1.33445	0.000194919	chr5	100535012	100535908	-0.99	0.00294	Promoter (<=1kb)	TRUE	2.32445		SLC1A5	1.83656
ENSG00000182749	PAQR7	-1.43201	6.3849e-17	chr1	25871889	25872826	-0.89	0.0146	Promoter (<=1kb)	TRUE	2.32201		RBSN	1.82923
ENSG00000164054	SHISA5	-1.42065	1.39609e-17	chr3	48507262	48508097	-0.9	0.00566	Promoter (2-3kb)	TRUE	2.32065		ARSK	1.82701
ENSG00000048707	VPS13D	-1.33817	2.48359e-20	chr1	12230707	12231647	-0.98	0.00324	Promoter (<=1kb)	TRUE	2.31817		GADD45G	1.82544
ENSG00000164620	RELL2	-1.23733	0.000183613	chr5	141636340	141638100	-1.08	0.00027	Promoter (<=1kb)	TRUE	2.31733		ZFHX2	1.82515
ENSG00000070087	PFN2	-1.47718	0.000114744	chr3	149970078	149971546	-0.84	0.0107	Promoter (<=1kb)	TRUE	2.31718		NPC2	1.82148
ENSG00000105289	TJP3	-1.05364	3.76421e-11	chr19	3748143	3749195	-1.26	0.000127	Promoter (<=1kb)	TRUE	2.31364		PROM2	1.81698
ENSG00000167703	SLC43A2	-1.15956	1.74775e-09	chr17	1576762	1577935	-1.15	2.44e-05	Promoter (<=1kb)	TRUE	2.30956		ZSWIM4	1.81325
ENSG00000075275	CELSR1	-1.0982	1.31189e-13	chr22	46377375	46378081	-1.21	8.34e-05	Promoter (<=1kb)	TRUE	2.3082		ANO10	1.81201
ENSG00000162496	DHRS3	-1.57591	4.01738e-24	chr1	12597761	12598343	-0.73	0.00921	Promoter (1-2kb)	TRUE	2.30591		DDAH2	1.8117
ENSG00000130821	SLC6A8	-1.41498	2.78225e-25	chrX	153687632	153688102	-0.89	0.00255	Promoter (<=1kb)	TRUE	2.30498		SEC13	1.80413
ENSG00000147010	SH3KBP1	-1.47019	0.00512729	chrX	19889502	19890226	-0.83	0.0239	Promoter (1-2kb)	TRUE	2.30019		SBSPON	1.79508
ENSG00000167815	PRDX2	-1.08965	4.97986e-06	chr19	12801625	12802334	-1.21	0.0003	Promoter (<=1kb)	TRUE	2.29965		ACTN1	1.77719
ENSG00000168944	CEP120	-1.65823	4.29743e-11	chr5	123423115	123424023	-0.63	0.0375	Promoter (<=1kb)	TRUE	2.28823		UBE2W	1.77571
ENSG00000118322	ATP10B	-1.57688	0.00184201	chr5	160685336	160685890	-0.71	0.00928	Promoter (<=1kb)	TRUE	2.28688		RHOA	1.77069
ENSG00000232656	IDI2-AS1	-1.23965	0.0134138	chr10	1034624	1035679	-1.04	0.00235	Promoter (1-2kb)	TRUE	2.27965		SUMF1	1.77027
ENSG00000165914	TTC7B	-1.59934	1.84409e-07	chr14	90816400	90816698	-0.68	0.0376	Promoter (<=1kb)	TRUE	2.27934		RNF145	1.76515
ENSG00000142657	PGD	-1.06804	3.57672e-12	chr1	10414968	10415664	-1.21	4.01e-06	Promoter (<=1kb)	TRUE	2.27804		ARHGAP32	1.76476
ENSG00000169855	ROBO1	-1.41747	8.03201e-07	chr3	79018634	79019964	-0.86	0.0131	Promoter (<=1kb)	TRUE	2.27747		PNRC1	1.75718
ENSG00000151150	ANK3	-1.57326	1.65193e-29	chr10	60139436	60141533	-0.7	0.0221	Promoter (<=1kb)	TRUE	2.27326		YBX3	1.75104
ENSG00000151150	ANK3	-1.57326	1.65193e-29	chr10	60114746	60115365	-0.7	0.0314	Promoter (<=1kb)	TRUE	2.27326		ZNF251	1.74072
ENSG00000134109	EDEM1	-1.46885	5.33475e-11	chr3	5186998	5188156	-0.8	0.00287	Promoter (<=1kb)	TRUE	2.26885		CHKA	1.73444
ENSG00000131503	ANKHD1	-1.18427	8.71497e-11	chr5	140400724	140402083	-1.08	7.84e-05	Promoter (<=1kb)	TRUE	2.26427		GTPBP6	1.73279
ENSG00000168890	TMEM150A	-1.3591	2.44194e-16	chr2	85604207	85605187	-0.9	0.00385	Promoter (1-2kb)	TRUE	2.2591		BLVRB	1.72247
ENSG00000139793	MBNL2	-1.22721	1.41644e-08	chr13	97359301	97359713	-1.03	0.00265	Promoter (2-3kb)	TRUE	2.25721		TMEM260	1.71702
ENSG00000125398	SOX9	-1.51028	9.41608e-09	chr17	72120524	72121773	-0.74	0.00908	Promoter (<=1kb)	TRUE	2.25028		POC1A	1.70321
ENSG00000101255	TRIB3	-1.5263	2.56997e-27	chr20	380142	381391	-0.72	0.00787	Promoter (<=1kb)	TRUE	2.2463		SAMD8	1.6939
ENSG00000115306	SPTBN1	-1.04444	1.02381e-08	chr2	54559669	54560701	-1.2	0.000356	Promoter (1-2kb)	TRUE	2.24444		CCNJL	1.68469
ENSG00000135535	CD164	-1.5121	9.41488e-20	chr6	109382047	109383441	-0.73	0.0115	Promoter (<=1kb)	TRUE	2.2421		CEBPD	1.63587
ENSG00000165959	CLMN	-1.15946	5.25835e-18	chr14	95307294	95307767	-1.08	0.00133	Promoter (<=1kb)	TRUE	2.23946		GRB7	1.62768
ENSG00000135052	GOLM1	-1.30902	6.15692e-21	chr9	86099194	86099749	-0.93	0.00795	Promoter (<=1kb)	TRUE	2.23902		ENGASE	1.6195
ENSG00000113108	APBB3	-1.42791	7.87052e-14	chr5	140564144	140565205	-0.81	0.00349	Promoter (<=1kb)	TRUE	2.23791		MYL6	1.60641
ENSG00000177570	SAMD12	-1.54539	3.01342e-12	chr8	118620561	118623238	-0.68	0.0146	Promoter (<=1kb)	TRUE	2.22539		Grand Total	12.5036
ENSG00000189337	KAZN	-1.55073	8.37252e-22	chr1	14945407	14946192	-0.67	0.0306	Promoter (<=1kb)	TRUE	2.22073
ENSG00000135407	AVIL	-1.47885	0.0014486	chr12	57810493	57811232	-0.74	0.0208	Promoter (1-2kb)	TRUE	2.21885
ENSG00000003249	DBNDD1	-1.18332	0.000481993	chr16	90019851	90021251	-1.03	0.000753	Promoter (<=1kb)	TRUE	2.21332
ENSG00000108582	CPD	-1.11882	3.04491e-14	chr17	30376440	30377153	-1.09	0.000195	Promoter (1-2kb)	TRUE	2.20882
ENSG00000126262	FFAR2	-1.31755	0.000195816	chr19	35448686	35450050	-0.89	0.00377	Promoter (<=1kb)	TRUE	2.20755
ENSG00000101417	PXMP4	-1.14383	1.13891e-06	chr20	33718423	33718719	-1.06	0.000598	Promoter (1-2kb)	TRUE	2.20383
ENSG00000151150	ANK3	-1.57326	1.65193e-29	chr10	60732807	60733729	-0.63	0.0373	Promoter (<=1kb)	TRUE	2.20326
ENSG00000204084	INPP5B	-1.46181	6.02976e-07	chr1	37931528	37932221	-0.74	0.0102	Promoter (<=1kb)	TRUE	2.20181
ENSG00000145781	COMMD10	-1.26839	6.6896e-07	chr5	116084637	116085481	-0.93	0.00335	Promoter (<=1kb)	TRUE	2.19839
ENSG00000131507	NDFIP1	-1.28767	4.82824e-15	chr5	142108532	142109240	-0.91	0.0015	Promoter (<=1kb)	TRUE	2.19767
ENSG00000090097	PCBP4	-1.37612	0.000482048	chr3	51973633	51974719	-0.82	0.00718	Promoter (<=1kb)	TRUE	2.19612
ENSG00000154359	LONRF1	-1.50357	5.2125e-06	chr8	12754039	12754501	-0.69	0.042	Promoter (<=1kb)	TRUE	2.19357
ENSG00000120306	CYSTM1	-1.2799	3.04965e-05	chr5	140174715	140175837	-0.91	0.00179	Promoter (<=1kb)	TRUE	2.1899
ENSG00000130653	PNPLA7	-1.38761	1.8227e-06	chr9	137479433	137479944	-0.8	0.0163	Promoter (<=1kb)	TRUE	2.18761
ENSG00000130340	SNX9	-1.07177	3.0821e-07	chr6	157700016	157700495	-1.11	0.00204	Promoter (<=1kb)	TRUE	2.18177
ENSG00000163513	TGFBR2	-1.24108	0.0226753	chr3	30606182	30607202	-0.94	0.00267	Promoter (<=1kb)	TRUE	2.18108
ENSG00000164494	PDSS2	-1.35033	0.00635695	chr6	107458984	107459988	-0.83	0.0059	Promoter (<=1kb)	TRUE	2.18033
ENSG00000142765	SYTL1	-1.33623	2.73495e-20	chr1	27341584	27342474	-0.84	0.0121	Promoter (<=1kb)	TRUE	2.17623
ENSG00000104964	AES	-1.1224	1.01456e-13	chr19	3054825	3056685	-1.05	9.47e-05	Promoter (<=1kb)	TRUE	2.1724
ENSG00000110628	SLC22A18	-1.47059	4.693e-21	chr11	2924257	2925166	-0.7	0.0448	Promoter (2-3kb)	TRUE	2.17059
ENSG00000247596	TWF2	-1.20628	1.73743e-09	chr3	52231623	52232046	-0.96	0.0336	Promoter (<=1kb)	TRUE	2.16628
ENSG00000140950	TLDC1	-1.45408	1.88057e-17	chr16	84501971	84502436	-0.71	0.0185	Promoter (2-3kb)	TRUE	2.16408
ENSG00000120725	SIL1	-1.29374	6.53784e-12	chr5	139131355	139132055	-0.87	0.0444	Promoter (<=1kb)	TRUE	2.16374
ENSG00000117640	MTFR1L	-1.55741	2.4551e-17	chr1	25819265	25820294	-0.6	0.049	Promoter (<=1kb)	TRUE	2.15741
ENSG00000124143	ARHGAP40	-1.50448	3.59693e-14	chr20	38604874	38605407	-0.65	0.0426	Promoter (2-3kb)	TRUE	2.15448
ENSG00000168374	ARF4	-1.25849	2.58893e-08	chr3	57596551	57598132	-0.89	0.00166	Promoter (<=1kb)	TRUE	2.14849
ENSG00000113328	CCNG1	-1.38636	2.39168e-06	chr5	163437214	163437999	-0.76	0.0119	Promoter (<=1kb)	TRUE	2.14636
ENSG00000068976	PYGM	-1.00864	0.0185435	chr11	64762412	64763794	-1.13	0.000317	Promoter (2-3kb)	TRUE	2.13864
ENSG00000072952	MRVI1	-1.50725	9.63717e-05	chr11	10652872	10654947	-0.63	0.0466	Promoter (<=1kb)	TRUE	2.13725
ENSG00000180098	TRNAU1AP	-1.35406	1.41204e-13	chr1	28552419	28553821	-0.78	0.00633	Promoter (<=1kb)	TRUE	2.13406
ENSG00000112893	MAN2A1	-1.47924	3.36014e-16	chr5	109688736	109690097	-0.65	0.0327	Promoter (<=1kb)	TRUE	2.12924
ENSG00000142910	TINAGL1	-1.20759	2.04271e-09	chr1	31576273	31576701	-0.92	0.0132	Promoter (<=1kb)	TRUE	2.12759
ENSG00000156453	PCDH1	-1.37596	2.12585e-11	chr5	141865771	141866679	-0.75	0.012	Promoter (<=1kb)	TRUE	2.12596
ENSG00000171940	ZNF217	-1.13353	6.98436e-15	chr20	53596437	53597251	-0.99	0.00128	Promoter (2-3kb)	TRUE	2.12353
ENSG00000145819	ARHGAP26	-1.33302	7.88312e-08	chr5	142769798	142770923	-0.79	0.008	Promoter (<=1kb)	TRUE	2.12302
ENSG00000172869	DMXL1	-1.24938	1.29756e-09	chr5	119070465	119071601	-0.87	0.0022	Promoter (<=1kb)	TRUE	2.11938
ENSG00000167202	TBC1D2B	-1.11797	3.27656e-07	chr15	78065326	78065887	-1	0.000557	Promoter (<=1kb)	TRUE	2.11797
ENSG00000163931	TKT	-1.40222	2.05341e-28	chr3	53255626	53256298	-0.71	0.0139	Promoter (<=1kb)	TRUE	2.11222
ENSG00000172216	CEBPB	-1.54059	5.24315e-37	chr20	50190049	50191633	-0.57	0.0372	Promoter (<=1kb)	TRUE	2.11059
ENSG00000117676	RPS6KA1	-1.39499	4.19088e-15	chr1	26529527	26531510	-0.71	0.0221	Promoter (<=1kb)	TRUE	2.10499
ENSG00000172965	MIR4435-2HG	-1.03165	1.42295e-07	chr2	111234887	111236355	-1.07	0.00224	Promoter (2-3kb)	TRUE	2.10165
ENSG00000164054	SHISA5	-1.42065	1.39609e-17	chr3	48472688	48473730	-0.68	0.0289	Promoter (<=1kb)	TRUE	2.10065
ENSG00000182600	SNORC	-1.31941	0.0109032	chr2	232876253	232876871	-0.78	0.0264	Promoter (<=1kb)	TRUE	2.09941
ENSG00000178607	ERN1	-1.18567	7.2765e-08	chr17	64056220	64056936	-0.91	0.00138	Promoter (1-2kb)	TRUE	2.09567
ENSG00000271858	Z84492.1	-1.35389	0.00252811	chr3	50364953	50365738	-0.74	0.0125	Promoter (<=1kb)	TRUE	2.09389
ENSG00000163874	ZC3H12A	-1.30087	3.19819e-14	chr1	37474192	37474699	-0.79	0.0111	Promoter (<=1kb)	TRUE	2.09087
ENSG00000168675	LDLRAD4	-1.26669	2.27605e-08	chr18	13541658	13542456	-0.82	0.022	Promoter (<=1kb)	TRUE	2.08669
ENSG00000247596	TWF2	-1.20628	1.73743e-09	chr3	52237412	52239253	-0.88	0.00293	Promoter (<=1kb)	TRUE	2.08628
ENSG00000196535	MYO18A	-1.49603	5.46821e-16	chr17	29124010	29125376	-0.59	0.0411	Promoter (2-3kb)	TRUE	2.08603
ENSG00000113282	CLINT1	-1.46917	3.23798e-15	chr5	157857904	157859325	-0.61	0.0437	Promoter (<=1kb)	TRUE	2.07917
ENSG00000185133	INPP5J	-1.24325	1.91174e-10	chr22	31122191	31123015	-0.83	0.012	Promoter (<=1kb)	TRUE	2.07325
ENSG00000173531	MST1	-1.16049	1.98104e-07	chr3	49686583	49686942	-0.91	0.0107	Promoter (<=1kb)	TRUE	2.07049
ENSG00000048707	VPS13D	-1.33817	2.48359e-20	chr1	12229687	12230275	-0.73	0.0184	Promoter (<=1kb)	TRUE	2.06817
ENSG00000177675	CD163L1	-1.34526	0.00249385	chr12	7369269	7369755	-0.72	0.0222	Promoter (<=1kb)	TRUE	2.06526
ENSG00000162522	KIAA1522	-1.39319	8.44744e-23	chr1	32742738	32744138	-0.67	0.0356	Promoter (<=1kb)	TRUE	2.06319
ENSG00000011021	CLCN6	-1.24009	1.09747e-08	chr1	11805245	11806459	-0.82	0.0039	Promoter (<=1kb)	TRUE	2.06009
ENSG00000011021	CLCN6	-1.24009	1.09747e-08	chr1	11838462	11838966	-0.82	0.0197	Promoter (2-3kb)	TRUE	2.06009
ENSG00000042317	SPATA7	-1.38146	0.000115157	chr14	88384963	88386068	-0.67	0.0228	Promoter (<=1kb)	TRUE	2.05146
ENSG00000162430	SELENON	-1.13997	7.56873e-11	chr1	25799917	25800332	-0.91	0.0142	Promoter (<=1kb)	TRUE	2.04997
ENSG00000115266	APC2	-1.34539	0.00555231	chr19	1453559	1453911	-0.7	0.0418	Promoter (<=1kb)	TRUE	2.04539
ENSG00000142655	PEX14	-1.21853	4.70005e-05	chr1	10472077	10472732	-0.82	0.00944	Promoter (<=1kb)	TRUE	2.03853
ENSG00000048707	VPS13D	-1.33817	2.48359e-20	chr1	12480844	12481131	-0.7	0.0131	Promoter (2-3kb)	TRUE	2.03817
ENSG00000144747	TMF1	-1.16693	6.99596e-08	chr3	69051866	69052751	-0.87	0.000996	Promoter (<=1kb)	TRUE	2.03693
ENSG00000142765	SYTL1	-1.33623	2.73495e-20	chr1	27349218	27350101	-0.7	0.03	Promoter (<=1kb)	TRUE	2.03623
ENSG00000156453	PCDH1	-1.37596	2.12585e-11	chr5	141878282	141879742	-0.66	0.0189	Promoter (<=1kb)	TRUE	2.03596
ENSG00000179761	PIPOX	-1.33174	0.0286515	chr17	29048638	29049259	-0.7	0.0342	Promoter (1-2kb)	TRUE	2.03174
ENSG00000100344	PNPLA3	-1.23961	8.04592e-09	chr22	43921504	43922309	-0.79	0.0197	Promoter (1-2kb)	TRUE	2.02961
ENSG00000258469	CHMP4BP1	-1.4283	2.24155e-06	chr14	55297917	55298888	-0.6	0.0444	Promoter (<=1kb)	TRUE	2.0283
ENSG00000198668	CALM1	-1.1573	1.90495e-18	chr14	90399145	90399812	-0.87	0.0078	Promoter (<=1kb)	TRUE	2.0273
ENSG00000198182	ZNF607	-1.33518	0.0376947	chr19	37719171	37720062	-0.69	0.0282	Promoter (<=1kb)	TRUE	2.02518
ENSG00000162522	KIAA1522	-1.39319	8.44744e-23	chr1	32753419	32754474	-0.63	0.0417	Promoter (<=1kb)	TRUE	2.02319
ENSG00000083844	ZNF264	-1.07238	0.00593313	chr19	57191352	57191885	-0.95	0.00221	Promoter (<=1kb)	TRUE	2.02238
ENSG00000185561	TLCD2	-1.17969	3.50658e-08	chr17	1710359	1710738	-0.84	0.00418	Promoter (<=1kb)	TRUE	2.01969
ENSG00000213445	SIPA1	-1.15769	0.00851604	chr11	65643872	65644340	-0.86	0.0118	Promoter (1-2kb)	TRUE	2.01769
ENSG00000205302	SNX2	-1.1471	3.35504e-09	chr5	122774656	122775638	-0.87	0.00148	Promoter (<=1kb)	TRUE	2.0171
ENSG00000205669	ACOT6	-1.25688	0.000118994	chr14	73609911	73611325	-0.76	0.0119	Promoter (<=1kb)	TRUE	2.01688
ENSG00000178607	ERN1	-1.18567	7.2765e-08	chr17	64081896	64082791	-0.82	0.00288	Promoter (1-2kb)	TRUE	2.00567
ENSG00000171940	ZNF217	-1.13353	6.98436e-15	chr20	53578733	53580120	-0.87	0.000719	Promoter (2-3kb)	TRUE	2.00353
ENSG00000179152	TCAIM	-1.07184	0.00111155	chr3	44338029	44338936	-0.93	0.00066	Promoter (<=1kb)	TRUE	2.00184
ENSG00000198668	CALM1	-1.1573	1.90495e-18	chr14	90396646	90397788	-0.84	0.00298	Promoter (<=1kb)	TRUE	1.9973
ENSG00000167306	MYO5B	-1.34128	1.01767e-12	chr18	50097646	50098084	-0.65	0.0363	Promoter (<=1kb)	TRUE	1.99128
ENSG00000104369	JPH1	-1.17127	4.61733e-09	chr8	74320458	74323252	-0.82	0.00713	Promoter (<=1kb)	TRUE	1.99127
ENSG00000165959	CLMN	-1.15946	5.25835e-18	chr14	95197444	95198116	-0.83	0.00699	Promoter (<=1kb)	TRUE	1.98946
ENSG00000150991	UBC	-1.41656	7.97499e-34	chr12	124914100	124914903	-0.57	0.0357	Promoter (<=1kb)	TRUE	1.98656
ENSG00000067182	TNFRSF1A	-1.24629	6.14038e-12	chr12	6341853	6342510	-0.74	0.0179	Promoter (<=1kb)	TRUE	1.98629
ENSG00000182179	UBA7	-1.25485	0.0104779	chr3	49813668	49814313	-0.73	0.0199	Promoter (<=1kb)	TRUE	1.98485
ENSG00000163867	ZMYM6	-1.18426	2.29838e-08	chr1	35031286	35032279	-0.8	0.00497	Promoter (<=1kb)	TRUE	1.98426
ENSG00000165507	DEPP1	-1.1397	0.030061	chr10	44978505	44979336	-0.84	0.00301	Promoter (<=1kb)	TRUE	1.9797
ENSG00000111344	RASAL1	-1.29914	3.33294e-08	chr12	113135686	113135971	-0.68	0.0475	Promoter (<=1kb)	TRUE	1.97914
ENSG00000145050	MANF	-1.06817	6.37638e-07	chr3	51388482	51389496	-0.91	0.00137	Promoter (<=1kb)	TRUE	1.97817
ENSG00000145050	MANF	-1.06817	6.37638e-07	chr3	51384607	51385350	-0.91	0.00177	Promoter (<=1kb)	TRUE	1.97817
ENSG00000130653	PNPLA7	-1.38761	1.8227e-06	chr9	137482131	137482495	-0.59	0.0352	Promoter (1-2kb)	TRUE	1.97761
ENSG00000147454	SLC25A37	-1.1539	1.65703e-08	chr8	23538756	23539272	-0.82	0.0194	Promoter (2-3kb)	TRUE	1.9739
ENSG00000198833	UBE2J1	-1.37271	3.1146e-14	chr6	89352373	89353225	-0.6	0.0335	Promoter (<=1kb)	TRUE	1.97271
ENSG00000113013	HSPA9	-1.09681	3.47017e-15	chr5	138575115	138576009	-0.87	0.00258	Promoter (<=1kb)	TRUE	1.96681
ENSG00000159023	EPB41	-1.26632	4.58209e-09	chr1	28886791	28887333	-0.7	0.0299	Promoter (<=1kb)	TRUE	1.96632
ENSG00000174950	CD164L2	-1.18517	0.00229006	chr1	27382847	27383764	-0.78	0.00831	Promoter (<=1kb)	TRUE	1.96517
ENSG00000100612	DHRS7	-1.30153	9.83336e-10	chr14	60164803	60165696	-0.66	0.0238	Promoter (<=1kb)	TRUE	1.96153
ENSG00000088726	TMEM40	-1.07915	4.08541e-09	chr3	12758734	12760133	-0.88	0.00288	Promoter (<=1kb)	TRUE	1.95915
ENSG00000087460	GNAS	-1.03435	3.40817e-16	chr20	58890851	58891697	-0.92	0.00249	Promoter (<=1kb)	TRUE	1.95435
ENSG00000168026	TTC21A	-1.10398	8.07531e-09	chr3	39140725	39142477	-0.85	0.00889	Promoter (2-3kb)	TRUE	1.95398
ENSG00000067992	PDK3	-1.05132	0.00433214	chrX	24494020	24495182	-0.9	0.00514	Promoter (<=1kb)	TRUE	1.95132
ENSG00000085662	AKR1B1	-1.23703	0.00104135	chr7	134458426	134459338	-0.71	0.0381	Promoter (<=1kb)	TRUE	1.94703
ENSG00000205669	ACOT6	-1.25688	0.000118994	chr14	73612095	73612889	-0.69	0.0374	Promoter (<=1kb)	TRUE	1.94688
ENSG00000092847	AGO1	-1.05406	1.47631e-10	chr1	35869319	35870168	-0.89	0.00472	Promoter (<=1kb)	TRUE	1.94406
ENSG00000233725	LINC00284	-1.00072	0.0457462	chr13	44021818	44022980	-0.94	0.0198	Promoter (<=1kb)	TRUE	1.94072
ENSG00000146463	ZMYM4	-1.16626	5.8477e-13	chr1	35268537	35269075	-0.77	0.0181	Promoter (<=1kb)	TRUE	1.93626
ENSG00000005884	ITGA3	-1.07469	5.13539e-13	chr17	50062211	50062805	-0.86	0.0166	Promoter (<=1kb)	TRUE	1.93469
ENSG00000166689	PLEKHA7	-1.16308	2.08267e-12	chr11	16805893	16807532	-0.77	0.0157	Promoter (2-3kb)	TRUE	1.93308
ENSG00000185033	SEMA4B	-1.01952	8.95358e-08	chr15	90191474	90192257	-0.91	0.0129	Promoter (<=1kb)	TRUE	1.92952
ENSG00000123124	WWP1	-1.25626	5.59467e-16	chr8	86341769	86343191	-0.67	0.0213	Promoter (<=1kb)	TRUE	1.92626
ENSG00000094841	UPRT	-1.02504	0.0198366	chrX	75273587	75274812	-0.9	0.00111	Promoter (<=1kb)	TRUE	1.92504
ENSG00000221994	ZNF630	-1.29453	8.1265e-05	chrX	48071400	48072024	-0.63	0.0298	Promoter (<=1kb)	TRUE	1.92453
ENSG00000171148	TADA3	-1.12327	4.59699e-05	chr3	9792408	9793671	-0.79	0.00456	Promoter (<=1kb)	TRUE	1.91327
ENSG00000130695	CEP85	-1.09399	6.62453e-06	chr1	26233759	26234627	-0.81	0.00643	Promoter (<=1kb)	TRUE	1.90399
ENSG00000075914	EXOSC7	-1.00242	7.65004e-05	chr3	44975200	44976657	-0.9	0.0105	Promoter (<=1kb)	TRUE	1.90242
ENSG00000081760	AACS	-1.25953	2.32283e-15	chr12	125124428	125125892	-0.64	0.0389	Promoter (<=1kb)	TRUE	1.89953
ENSG00000125753	VASP	-1.28859	7.87052e-14	chr19	45528005	45529302	-0.61	0.0411	Promoter (2-3kb)	TRUE	1.89859
ENSG00000198961	PJA2	-1.20743	1.98044e-06	chr5	109409458	109410837	-0.69	0.0144	Promoter (<=1kb)	TRUE	1.89743
ENSG00000148572	NRBF2	-1.07743	6.60451e-08	chr10	63132897	63133831	-0.82	0.00416	Promoter (<=1kb)	TRUE	1.89743
ENSG00000171223	JUNB	-1.13615	8.72135e-10	chr19	12791340	12791977	-0.76	0.0055	Promoter (<=1kb)	TRUE	1.89615
ENSG00000126775	ATG14	-1.11551	1.45062e-08	chr14	55411540	55413875	-0.77	0.00464	Promoter (<=1kb)	TRUE	1.88551
ENSG00000275223	AL121906.2	-1.12392	0.0429797	chr20	33654028	33654518	-0.76	0.0225	Promoter (1-2kb)	TRUE	1.88392
ENSG00000126005	MMP24OS	-1.01755	1.24928e-10	chr20	35268939	35269721	-0.86	0.0115	Promoter (2-3kb)	TRUE	1.87755
ENSG00000125037	EMC3	-1.00138	4.08346e-06	chr3	9976702	9977515	-0.87	0.00225	Promoter (<=1kb)	TRUE	1.87138
ENSG00000188277	C15orf62	-1.03042	0.00648973	chr15	40769269	40770138	-0.84	0.00777	Promoter (<=1kb)	TRUE	1.87042
ENSG00000171988	JMJD1C	-1.07764	1.47063e-08	chr10	63216697	63217672	-0.79	0.013	Promoter (<=1kb)	TRUE	1.86764
ENSG00000112335	SNX3	-1.05072	2.08489e-06	chr6	108260299	108261606	-0.81	0.0098	Promoter (<=1kb)	TRUE	1.86072
ENSG00000187764	SEMA4D	-1.06895	9.09932e-06	chr9	89435463	89435826	-0.79	0.0125	Promoter (<=1kb)	TRUE	1.85895
ENSG00000254999	BRK1	-1.01635	8.82753e-05	chr3	10115198	10116114	-0.84	0.00582	Promoter (<=1kb)	TRUE	1.85635
ENSG00000184305	CCSER1	-1.10517	0.0158059	chr4	90127091	90129017	-0.75	0.00836	Promoter (<=1kb)	TRUE	1.85517
ENSG00000169504	CLIC4	-1.18307	1.9324e-05	chr1	24744914	24745683	-0.67	0.0258	Promoter (<=1kb)	TRUE	1.85307
ENSG00000213983	AP1G2	-1.10058	1.06343e-10	chr14	23569425	23570177	-0.75	0.02	Promoter (1-2kb)	TRUE	1.85058
ENSG00000168026	TTC21A	-1.10398	8.07531e-09	chr3	39124910	39126758	-0.74	0.0164	Promoter (2-3kb)	TRUE	1.84398
ENSG00000104427	ZC2HC1A	-1.06856	1.40599e-07	chr8	78665536	78666695	-0.77	0.00997	Promoter (<=1kb)	TRUE	1.83856
ENSG00000142657	PGD	-1.06804	3.57672e-12	chr1	10398494	10399585	-0.77	0.00775	Promoter (<=1kb)	TRUE	1.83804
ENSG00000171988	JMJD1C	-1.07764	1.47063e-08	chr10	63268832	63269442	-0.76	0.00659	Promoter (<=1kb)	TRUE	1.83764
ENSG00000105281	SLC1A5	-1.03656	1.09592e-10	chr19	46788240	46789594	-0.8	0.00474	Promoter (<=1kb)	TRUE	1.83656
ENSG00000131381	RBSN	-1.13923	4.72708e-05	chr3	15098698	15099701	-0.69	0.0383	Promoter (<=1kb)	TRUE	1.82923
ENSG00000164291	ARSK	-1.19701	0.0125092	chr5	95554516	95555438	-0.63	0.0253	Promoter (<=1kb)	TRUE	1.82701
ENSG00000130222	GADD45G	-1.12544	2.60656e-08	chr9	89604346	89605221	-0.7	0.0402	Promoter (<=1kb)	TRUE	1.82544
ENSG00000136367	ZFHX2	-1.03515	0.0061492	chr14	23551340	23552049	-0.79	0.0099	Promoter (<=1kb)	TRUE	1.82515
ENSG00000119655	NPC2	-1.21148	7.53232e-08	chr14	74493247	74494128	-0.61	0.0436	Promoter (<=1kb)	TRUE	1.82148
ENSG00000155066	PROM2	-1.08698	8.14269e-17	chr2	95277461	95277801	-0.73	0.0226	Promoter (<=1kb)	TRUE	1.81698
ENSG00000132003	ZSWIM4	-1.02325	1.15703e-08	chr19	13803022	13803899	-0.79	0.00804	Promoter (1-2kb)	TRUE	1.81325
ENSG00000160746	ANO10	-1.20201	2.51188e-06	chr3	43621751	43622784	-0.61	0.042	Promoter (<=1kb)	TRUE	1.81201
ENSG00000213722	DDAH2	-1.0217	3.46052e-08	chr6	31729182	31730360	-0.79	0.00714	Promoter (<=1kb)	TRUE	1.8117
ENSG00000157020	SEC13	-1.09413	4.15138e-08	chr3	10320872	10321486	-0.71	0.0159	Promoter (<=1kb)	TRUE	1.80413
ENSG00000090565	RAB11FIP3	-1.01924	1.89071e-13	chr16	503343	503783	-0.78	0.04	Promoter (<=1kb)	TRUE	1.79924
ENSG00000164764	SBSPON	-1.03508	0.00230246	chr8	73090103	73091399	-0.76	0.0029	Promoter (1-2kb)	TRUE	1.79508
ENSG00000175087	PDIK1L	-1.07911	9.82474e-06	chr1	26110932	26112435	-0.71	0.0182	Promoter (<=1kb)	TRUE	1.78911
ENSG00000072110	ACTN1	-1.03719	5.18134e-12	chr14	68978765	68979951	-0.74	0.00628	Promoter (<=1kb)	TRUE	1.77719
ENSG00000104343	UBE2W	-1.07571	1.23553e-06	chr8	73878182	73879413	-0.7	0.0162	Promoter (<=1kb)	TRUE	1.77571
ENSG00000067560	RHOA	-1.15069	2.27205e-12	chr3	49411557	49412575	-0.62	0.0406	Promoter (<=1kb)	TRUE	1.77069
ENSG00000144455	SUMF1	-1.14027	0.000278279	chr3	4466794	4467664	-0.63	0.0316	Promoter (<=1kb)	TRUE	1.77027
ENSG00000145860	RNF145	-1.07515	3.06765e-15	chr5	159209511	159210603	-0.69	0.0262	Promoter (<=1kb)	TRUE	1.76515
ENSG00000134909	ARHGAP32	-1.19476	1.33107e-22	chr11	129189715	129190466	-0.57	0.0481	Promoter (1-2kb)	TRUE	1.76476
ENSG00000146278	PNRC1	-1.05718	4.85491e-11	chr6	89080354	89082069	-0.7	0.016	Promoter (<=1kb)	TRUE	1.75718
ENSG00000105281	SLC1A5	-1.03656	1.09592e-10	chr19	46784584	46785288	-0.72	0.0124	Promoter (<=1kb)	TRUE	1.75656
ENSG00000060138	YBX3	-1.00104	2.18915e-12	chr12	10721863	10723609	-0.75	0.01	Promoter (<=1kb)	TRUE	1.75104
ENSG00000198169	ZNF251	-1.12072	7.74354e-05	chr8	144754939	144755834	-0.62	0.0344	Promoter (<=1kb)	TRUE	1.74072
ENSG00000110721	CHKA	-1.12444	2.36009e-12	chr11	68121127	68122111	-0.61	0.0352	Promoter (<=1kb)	TRUE	1.73444
ENSG00000184640	2009-09-01	-1.01441	9.82082e-12	chr17	77286087	77289021	-0.72	0.0151	Promoter (<=1kb)	TRUE	1.73441
ENSG00000178605	GTPBP6	-1.01279	2.93301e-11	chrX	317847	319195	-0.72	0.00832	Promoter (<=1kb)	TRUE	1.73279
ENSG00000090013	BLVRB	-1.00247	2.66623e-09	chr19	40463301	40464608	-0.72	0.00946	Promoter (1-2kb)	TRUE	1.72247
ENSG00000120733	KDM3B	-1.04016	8.74504e-10	chr5	138352191	138353579	-0.68	0.0423	Promoter (<=1kb)	TRUE	1.72016
ENSG00000070269	TMEM260	-1.08702	9.88587e-07	chr14	56579267	56580202	-0.63	0.0252	Promoter (<=1kb)	TRUE	1.71702
ENSG00000168036	CTNNB1	-1.02372	4.5089e-07	chr3	41199020	41199769	-0.69	0.025	Promoter (<=1kb)	TRUE	1.71372
ENSG00000164087	POC1A	-1.05321	0.000562373	chr3	52153398	52154984	-0.65	0.0278	Promoter (<=1kb)	TRUE	1.70321
ENSG00000213983	AP1G2	-1.10058	1.06343e-10	chr14	23567105	23567920	-0.6	0.035	Promoter (<=1kb)	TRUE	1.70058
ENSG00000156671	SAMD8	-1.0739	1.26613e-08	chr10	75111105	75112320	-0.62	0.0388	Promoter (<=1kb)	TRUE	1.6939
ENSG00000135083	CCNJL	-1.02469	4.18783e-05	chr5	160315878	160316390	-0.66	0.0232	Promoter (2-3kb)	TRUE	1.68469
ENSG00000221869	CEBPD	-1.00587	8.59687e-06	chr8	47737688	47739110	-0.63	0.0242	Promoter (<=1kb)	TRUE	1.63587
ENSG00000141738	GRB7	-1.02768	7.13634e-12	chr17	39735977	39736595	-0.6	0.0422	Promoter (1-2kb)	TRUE	1.62768
ENSG00000167280	ENGASE	-1.0295	1.30575e-11	chr17	79074365	79075148	-0.59	0.0435	Promoter (<=1kb)	TRUE	1.6195
ENSG00000092841	MYL6	-1.03641	2.54869e-15	chr12	56157736	56159410	-0.57	0.0424	Promoter (<=1kb)	TRUE	1.60641
